# Supplementary material for: Phylogenomic assessment of 23 equid alphaherpesvirus 1 isolates obtained from USA-based equids
Source: Virol J. 2023 Nov 29;20:278. doi: 10.1186/s12985-023-02248-z (PMC10688130; doi:10.1186/s12985-023-02248-z)
Supplement: Supplementary file 1 — Additional file 1: Table S1. Details of all 137 EHV-1 isolates used for this study including the 114 archived isolates obtained from Genbank. [file 12985_2023_2248_MOESM1_ESM.xlsx]

## Sheet: Sheet1
Strain ID	Ascession Number	Geographic location	Disease type	Isolation year
LS9816616	Pending	California, USA	Abortion	1998
LS180416	Pending	Indiana, USA	Abortion	2018
KU206463	BERKSHIRE/7/1996	Berkshire, UK	Abortion	1996
KT324730	1074-94	Toowoomba, Australia	Abortion	1994
KU206462	HAMPSHIRE/1/2008	Hampshire, UK	Abortion	2008
KT324725	3045-07	New South Wales, Australia	Abortion	2007
KT324733	717A-82	Victoria, Australia	Neurological/Abortion	1982
LS113812	Pending	Iowa, USA	Abortion	2021
LS100106	Pending	Indiana, USA	Abortion	2010
KF644578	01c1	Japan	Unknown	Unknown
KF644579	89c25	Japan	Unknown	Unknown
KF644576	00c19	Japan	Unknown	Unknown
KF644577	89c105	Japan	Unknown	Unknown
KF644566	90c16	Japan	Unknown	Unknown
KU206464	LEICESTERSHIRE/22/1996	Leicestershire, UK	Neurological	1996
KU206465	UK/32/1982	UK	Abortion	1982
KU206466	HERTFORDSHIRE/188/2010	Hertfordshire, UK	Ataxia	2010
NC_001491	Ab4	UK	Unknown	Unknown
KU206468	Ab1 ‐ 1979	UK	Abortion	1979
MT063054	YM2019	China	Unknown	2019
KU206467	HONG KONG/57/1984	Hong Kong	Respiratory	1984
LS213627	Pending	Iowa, USA	Abortion	2021
MF975656	RacL11	USA	Unknown	Unknown
MF975655	KyA	USA	Unknown	Unknown
KU206480	SUFFOLK/123/2005	Suffolk,UK	Abortion	2005
KU206477	ARMY 183 ‐ 1941	USA	Respiratory	1941
KF644570	NY05	USA	Unknown	Unknown
KU206474	SUFFOLK/10/2012	Suffolk, UK	Abortion	2012
KU206475	LINCOLNSHIRE/2/2012	Lincolnshire, UK	Abortion	2012
KU206476	HERTFORDSHIRE/109/2009	Hertfordshire, UK	Died one day post partum	2009
LS050627	Pending	North Dakota, USA	Abortion	2005
LS161221	Pending	Indiana, USA	Abortion	2016
LS161227	Pending	Indiana, USA	Abortion	2016
LS170109	Pending	Indiana, USA	Abortion	2017
KT324724	NZA-77	New Zealand	Abortion	1977
LS0433182	Pending	South Dakota, USA	Neurological	2004
KF644572	VA02	USA	Unknown	Unknown
LS140325	Pending	Indiana, USA	Abortion	2014
LS9922376	Pending	California, USA	Abortion	1999
LS143101	Pending	Indiana, USA	Abortion	2014
LS140310	Pending	Indiana, USA	Abortion	2014
KT324727	2222-03	Scone, Australia	Abortion	2003
LS170307	Pending	Indiana, USA	Abortion	2017
LS080124	Pending	Indiana, USA	Abortion	2008
KT324731	1029-93	Wakefield, Australia	Abortion	1993
KU206472	ESSEX/81/1994	Essex, UK	Abortion	1994
KU206470	OXFORDSHIRE/206/2013	Oxfordshire, UK	Ataxia	2013
KU206473	YORKSHIRE/114/1999	Yorkshire,UK	Abortion	1999
KU206469	DEVONSHIRE/97/2012	Devonshire, UK	Neurological	2012
KU206471	OXFORDSHIRE/207/2013	Oxfordshire, UK	Ataxia	2013
MT077857	EHV1/Meerut/2014	India	Unknown	2014
MW396758	Hisar-9/2014	India	Unknown	2014
MW396759	Hisar-1/2017	India	Unknown	2017
MW396756	Delhi-3/2007	India	Unknown	2007
MW396760	Hisar-1/2018	India	Unknown	2018
MW396757	Tohana-2/2013	India	Unknown	2013
KU206453	KENT/43/1994	Kent, UK	Abortion	1994
KU206452	SUFFOLK/45/2013	Suffolk, UK	Abortion	2013
KU206451	BRISTOL/2/1993	Bristol, UK	Abortion	1993
AY464052	V592	UK	Unknown	Unknown
KF644568	NMKT04	UK	Unknown	Unknown
KU206457	OXFORDSHIRE/34/2011	Oxfordshire, UK	Abortion	2011
KU206458	SUFFOLK/41/2013	Suffolk, UK	Abortion	2013
KU206460	SUFFOLK/110/1994	Suffolk, UK	Abortion	1994
KU206455	BUCKINGHAMSHIRE/93/2011	Buckinghamshire, UK	Abortion	2011
KY852346	Hertfordshire/150/2016	Hertfordshire,UK	Unknown	2016
KU206456	OXFORDSHIRE/31/2011	Oxfordshire, UK	Abortion	2011
KU206454	OXFORDSHIRE/27/2011	Oxfordshire, UK	Neurological	2011
KU206461	ABERDEENSHIRE/84/2013	Aberdeenshire, UK	Abortion	2013
KU206459	SUFFOLK/73/1985	Suffolk, UK	Abortion	1985
KU206479	SUFFOLK/91/1994	Suffolk, UK	Abortion	1994
KU206447	GLOUCESTERSHIRE/54/2013	Gloucestershire, UK	Neurological	2013
KU206449	GLOUCESTERSHIRE/108/2013	Gloucestershire, UK	Neurological	2013
KU206450	GLOUCESTERSHIRE/114/2013	Gloucestershire, UK	Neurological	2013
KU206446	GLOUCESTERSHIRE/77/2013	Gloucestershire, UK	Neurological	2013
KU206444	UK/58/2003	UK	Neurological	2003
KU206448	GLOUCESTERSHIRE/70/2013	Gloucestershire, UK	Neurological	2013
KU206445	GLOUCESTERSHIRE/127/1998	Gloucestershire, UK	Neurological	1998
KU206441	SUFFOLK/82/2013	Suffolk, UK	Abortion	2013
LS9719959	Pending	Virginia, USA	Abortion	1997
KU206443	SUFFOLK/87/2009	Suffolk, UK	Abortion	2009
KU206442	SUFFOLK/89/2013	Suffolk, UK	Abortion	2013
LS110097	Pending	Iowa, USA	Abortion	2021
LS111457	Pending	Iowa, USA	Abortion	2021
LS110976	Pending	Iowa, USA	Abortion	2021
LS119764	Pending	Iowa, USA	Abortion	2021
LS110114	Pending	Iowa, USA	Abortion	2021
MW855962	FR/Valencia2/2021	France	Unknown	2021
MW855961	FR/Valencia1/2021	France	Unknown	2021
MZ357402	H3_Allg_92_21/CH/2021	Switzerland	Unknown	2021
MW855958	BE/21P40/2021	Belgium	Unknown	2021
MW855959	BE/21P41/2021	Belgium	Unknown	2021
MW855960	BE/21P43_BD5/2021	Belgium	Unknown	2021
KU206440	DEVON/28/2003	Devon, UK	Respiratory	2003
KU206439	CAMBRIDGESHIRE/96/2013	Cambridgeshire, UK	Abortion	2013
KU206424	BRISTOL/55/2004	Bristol, UK	Abortion	2004
KU206425	SUFFOLK/48/2013	Suffolk, UK	Abortion	2013
KU206418	YORKSHIRE/1/1993	Yorkshire, UK	Abortion	1993
KU206427	NORFOLK/124/2010	Norfolk, UK	Abortion	2010
KU206429	DERBYSHIRE/39/2002	Derbyshire, UK	Abortion	2002
KU206421	WILTSHIRE/40/1996	Wiltshire, UK	Abortion	1996
KU206417	SUFFOLK/16/1996	Suffolk, UK	Abortion	1996
KU206422	SUFFOLK/60/1996	Suffolk, UK	Abortion	1996
KU206432	CAMBRIDGESHIRE/3/1995	Cambridgeshire, UK	Abortion	1995
KU206416	LINCOLNSHIRE/13/1996	Lincolnshire, UK	Abortion	1996
KU206419	HAMPSHIRE/77/2009	Hampshire, UK	Abortion	2009
KU206420	NOTTINGHAMSHIRE/70/2004	Nottinghamshire, UK	Abortion	2004
KU206430	SUFFOLK/48/2005	Suffolk, UK	Respiratory	2005
KU206426	SUFFOLK/125/2013	Suffolk, UK	Abortion	2013
KU206433	BUCKINGHAMSHIRE/114/2010	Buckinghamshire, UK	Abortion	2010
KU206413	LEICESTERSHIRE/13/2000	Leicestershire, UK	Abortion	2000
KU206412	LINCOLNSHIRE/10/1996	Lincolnshire, UK	Abortion	1996
KU206428	BUCKINGHAMSHIRE/9/1993	Buckinghamshire, UK	Abortion	1993
KU206431	BUCKINGHAMSHIRE/24/2012	Buckinghamshire, UK	Abortion	2012
KU206436	STAFFORDSHIRE/80/1989	Staffordshire, UK	Abortion	1989
LS130922	Pending	Iowa, USA	Abortion	2013
KU206415	UK/106/1985	UK	Conjunctivitis	1985
KT324729	1966-02	Seymour, Australia	Abortion	2022
KT324726	3038-07	Victoria, Australia	Neurological	2007
KU206435	KENT/177/1991	Kent, UK	Abortion	1991
KU206434	UK/109/1994	UK	Abortion	1994
KT324728	2019-02	Clayton, Australia	Abortion	2002
KT324734	438-77	Scone, Australia	Abortion	1977
KU206414	UK/58/1995	UK	Abortion	1995
KT324732	970-90	South Australia, Australia	Abortion	1990
KU206437	YORKSHIRE/12/1990	Yorkshire, UK	Abortion	1990
KU206406	CHESHIRE/275/2010	Cheshire, UK	Abortion	2010
KU206423	LEICESTERSHIRE/59/1996	Leicestershire, UK	Abortion	1996
KU206409	SUFFOLK/82/1994	Suffolk, UK	Respiratory	1994
KU206407	SHROPSHIRE/38/1996	Shropshire, UK	Abortion	1996
KF644567	FL06	USA	Unknown	Unknown
KU206410	ESSEX/199/2005	Essex, UK	Abortion	2005
KU206405	SHROPSHIRE/167/2006	Shropshire, UK	Abortion	2006
KU206411	ESSEX/200/2005	Essex, UK	Abortion	2005
KU206408	SHROPSHIRE/68/1989	Shropshire, UK	Abortion	1989
KU206404	NOTTINGHAMSHIRE/10/2004	Nottinghamshire, UK	Abortion	2004
KU206438	BERKSHIRE/64/2009	Berkshire, UK	Abortion	2009
EHV-8	NC017826	China	Unknown	Unknown
