# Supplementary material for: Phylogenomic assessment of 23 equid alphaherpesvirus 1 isolates obtained from USA-based equids
Source: Virol J. 2023 Nov 29;20:278. doi: 10.1186/s12985-023-02248-z (PMC10688130; doi:10.1186/s12985-023-02248-z)
Supplement: Supplementary file 3 — Additional file 3: Tables S3–S25. Nucleotide substitution tables for the 23 newly sequenced 23 USA EHV-1 isolates. Details include substitution position and size, type and amino acid change (if any). [file 12985_2023_2248_MOESM3_ESM.xlsx]

## Sheet: ST3-LS050627
Minimum	Maximum	Length	Polymorphism Type	Change	Codon Change	Amino Acid Change	Protein Effect	CDS	CDS Position
127	143	17	Deletion (tandem repeat)	(AGGCCACGCCCACTGGG)12 -> (AGGCCACGCCCACTGGG)11
225	224	0	Insertion (tandem repeat)	(AGGCCACGCCCACTGGG)12 -> (AGGCCACGCCCACTGGG)13
519	518	0	Insertion (tandem repeat)	(TGGGGCTCACTGCTATGC)19 -> (TGGGGCTCACTGCTATGC)20
609	626	18	Deletion (tandem repeat)	(TGGGGCTCACTGCTATGC)19 -> (TGGGGCTCACTGCTATGC)18
876	876	1	SNP (transition)	C -> T
5517	5517	1	SNP (transversion)	A -> C	GTC -> GGC	V -> G	Substitution	unknown CDS	341
5585	5585	1	SNP (transition)	C -> T	GCG -> GCA		None	unknown CDS	273
5893	5892	0	Insertion (tandem repeat)	(TG)2 -> (TG)3
5898	5898	1	SNP (transition)	C -> T
6142	6142	1	SNP (transition)	C -> T	AAG -> AAA		None	glycoprotein K CDS	882
6330	6330	1	SNP (transition)	A -> G	TTG -> CTG		None	glycoprotein K CDS	694
6805	6805	1	SNP (transition)	G -> A	AGC -> AGT		None	glycoprotein K CDS	219
10620	10620	1	SNP (transition)	A -> G	AAC -> GAC	N -> D	Substitution	unknown CDS	340
11158	11158	1	SNP (transition)	G -> A	TCC -> TCT		None	deoxyuridine triphosphatase CDS	939
11761	11761	1	SNP (transversion)	G -> T	CGC -> CGA		None	deoxyuridine triphosphatase CDS	336
13094	13094	1	SNP (transversion)	A -> C	AAG -> CAG	K -> Q	Substitution	tegument protein CDS	565
13277	13277	1	SNP (transversion)	G -> T	GCT -> TCT	A -> S	Substitution	tegument protein CDS	748
15178	15178	1	SNP (transversion)	C -> G
15383	15383	1	SNP (transversion)	C -> A	CGC -> CGA		None	tegument protein CDS	84
16213	16213	1	SNP (transition)	T -> C	TTA -> TCA	L -> S	Substitution	tegument protein CDS	914
16512	16512	1	SNP (transition)	G -> A	GCA -> ACA	A -> T	Substitution	tegument protein CDS	1213
16677	16677	1	SNP (transition)	A -> G	ACC -> GCC	T -> A	Substitution	tegument protein CDS	1378
16773	16773	1	SNP (transition)	G -> A	GAA -> AAA	E -> K	Substitution	tegument protein CDS	1474
17110	17110	1	SNP (transversion)	C -> G	GCT -> GGT	A -> G	Substitution	tegument protein CDS	1811
17209	17209	1	SNP (transition)	C -> T	GCA -> GTA	A -> V	Substitution	tegument protein CDS	1910
19746	19746	1	SNP (transition)	A -> G	AAT -> GAT	N -> D	Substitution	tegument protein CDS	1681
21491	21491	1	SNP (transition)	A -> G	GTT -> GTC		None	glycoprotein C CDS	1353
22271	22271	1	SNP (transition)	C -> T	ACG -> ACA		None	glycoprotein C CDS	573
23249	23249	1	SNP (transition)	A -> G	ATT -> ATC		None	putative integral membrane protein CDS	978
27258	27259	2	Substitution	GG -> AA	TCG,GAT -> TCA,AAT	SD -> SN	Substitution	tegument protein CDS	1005
27439	27439	1	SNP (transition)	G -> A	GCT -> ACT	A -> T	Substitution	tegument protein CDS	1186
28116	28116	1	SNP (transition)	A -> G	TTG -> CTG		None	small subunit of ribonucleotide reductase CDS	736
29981	29981	1	SNP (transition)	C -> T	GGT -> AGT	G -> S	Substitution	large subunit of ribonucleotide reductase CDS	1288
31502	31501	0	Insertion	G
31620	31620	1	SNP (transition)	G -> A	CCC -> TCC	P -> S	Substitution	capsid protein CDS	1288
31692	31692	1	SNP (transition)	A -> G	TTG -> CTG		None	capsid protein CDS	1216
39071	39071	1	SNP (transition)	T -> C	ATT -> ATC		None	very large tegument protein CDS	2493
43535	43535	1	SNP (transition)	G -> A	CCG -> CCA		None	very large tegument protein CDS	6957
44188	44188	1	SNP (transition)	C -> T	TCT -> TTT	S -> F	Substitution	very large tegument protein CDS	7610
44334	44334	1	SNP (transition)	A -> G	AGC -> GGC	S -> G	Substitution	very large tegument protein CDS	7756
44872	44873	2	Substitution	CC -> GG	GCC -> GGG	A -> G	Substitution	very large tegument protein CDS	8294
44874	44875	2	Substitution	CC -> GT	CCC -> GTC	P -> V	Substitution	very large tegument protein CDS	8296
44877	44879	2	Substitution	GCC -> TCT	GCC -> TCT	A -> S	Substitution	very large tegument protein CDS	8299
44885	44885	1	SNP (transversion)	C -> A	GCC -> GCA		None	very large tegument protein CDS	8307
44886	44886	1	SNP (transversion)	C -> G	CCG -> GCG	P -> A	Substitution	very large tegument protein CDS	8308
44905	44907	3	Substitution	CCC -> GGG	GCC,CCC -> GGG,GCC	AP -> GA	Substitution	very large tegument protein CDS	8327
44908	44908	1	SNP (transversion)	C -> A	CCC -> CAC	P -> H	Substitution	very large tegument protein CDS	8330
44908	44908	1	SNP (transition)	C -> T	CCC -> CTC	P -> L	Substitution	very large tegument protein CDS	8330
44910	44913	3	Substitution	GCCG -> TCTA	GCC,GCG -> TCT,ACG	AA -> ST	Substitution	very large tegument protein CDS	8332
44919	44927	9	Deletion	CCGGCCAAAA	CCG,GCC,AAA ->	PAK ->	Deletion	very large tegument protein CDS	8341
44929	44929	1	SNP (transition)	C -> T	TCT -> TTT	S -> F	Substitution	very large tegument protein CDS	8351
44932	44932	1	SNP (transversion)	C -> G	GCG -> GGG	A -> G	Substitution	very large tegument protein CDS	8354
44935	44942	8	Deletion	CGGCCCCC			Frame Shift	very large tegument protein CDS	8357
45068	45068	1	SNP (transition)	G -> A	AAG -> AAA		None	very large tegument protein CDS	8490
45074	45074	1	SNP (transition)	G -> A	CAG -> CAA		None	very large tegument protein CDS	8496
45075	45077	2	Substitution	GCC -> ACA	GCC -> ACA	A -> T	Substitution	very large tegument protein CDS	8497
45080	45080	1	SNP (transition)	G -> A	AAG -> AAA		None	very large tegument protein CDS	8502
45081	45083	2	Substitution	GAC -> TAA			Truncation	very large tegument protein CDS	8503
45084	45086	2	Substitution	CAG -> GAT	CAG -> GAT	Q -> D	Substitution	very large tegument protein CDS	8506
45089	45089	1	SNP (transition)	C -> T	GCC -> GCT		None	very large tegument protein CDS	8511
45090	45092	2	Substitution	AAG -> GAA	AAG -> GAA	K -> E	Substitution	very large tegument protein CDS	8512
45094	45094	1	SNP (transversion)	A -> T	GAC -> GTC	D -> V	Substitution	very large tegument protein CDS	8516
45101	45101	1	SNP (transversion)	C -> A	GCC -> GCA		None	very large tegument protein CDS	8523
45105	45106	2	Deletion	GA			Frame Shift	very large tegument protein CDS	8527
45107	45107	1	SNP (transversion)	C -> A	GAC -> GAA	D -> E	Substitution	very large tegument protein CDS	8529
45255	45255	1	SNP (transition)	T -> C	TTG -> CTG		None	very large tegument protein CDS	8677
47847	47847	1	SNP (transversion)	T -> A	TCA -> TCT		None	membrane associated phosphoprotein CDS	318
48318	48318	1	SNP (transition)	A -> G	ATT -> ATC		None	DNA packaging protein CDS	408
49041	49041	1	SNP (transition)	T -> C	CTT -> CTC		None	DNA packaging protein CDS	345
49989	49989	1	SNP (transition)	C -> T	GCC -> GCT		None	DNA packaging protein CDS	1293
50206	50206	1	SNP (transition)	C -> T	CTA -> TTA		None	DNA packaging protein CDS	1510
50586	50586	1	SNP (transversion)	A -> C	AAG -> ACG	K -> T	Substitution	unknown CDS	35
52151	52151	1	SNP (transition)	T -> C	AAG -> GAG	K -> E	Substitution	DNA polymerase CDS	2968
52865	52865	1	SNP (transition)	T -> C	AAC -> GAC	N -> D	Substitution	DNA polymerase CDS	2254
54195	54195	1	SNP (transition)	A -> G	TTT -> TTC		None	DNA polymerase CDS	924
55151	55150	0	Insertion (tandem repeat)	(T)6 -> (T)7
55378	55378	1	SNP (transition)	A -> G
55655	55655	1	SNP (transition)	G -> A	AGC -> AAC	S -> N	Substitution	ssDNA binding protein CDS	269
58401	58401	1	SNP (transversion)	C -> A	CGC -> CGA		None	ssDNA binding protein CDS	3015
59301	59301	1	SNP (transition)	T -> C	TTG -> TCG	L -> S	Substitution	DNA packaging protein CDS	125
62709	62709	1	SNP (transition)	A -> G	TCA -> TCG		None	envelope glycoprotein B CDS	1344
64667	64667	1	SNP (transversion)	G -> T	CAG -> CAT	Q -> H	Substitution	unknown CDS	156
64708	64708	1	SNP (transition)	G -> A	GGT -> GAT	G -> D	Substitution	unknown CDS	197
64814	64814	1	SNP (transversion)	C -> A	GCC -> GCA		None	unknown CDS	303
67161	67161	1	SNP (transversion)	C -> A	TTG -> TTT	L -> F	Substitution	unknown CDS	1749
67696	67696	1	SNP (transition)	C -> T	AGA -> AAA	R -> K	Substitution	unknown CDS	1214
68771	68771	1	SNP (transversion)	G -> T	CGC -> AGC	R -> S	Substitution	unknown CDS	139
70274	70274	1	SNP (transversion)	G -> T	TCG -> TCT		None	thymidine kinase CDS	432
72443	72443	1	SNP (transition)	T -> C	TTA -> TCA	L -> S	Substitution	envelope glycoprotein H CDS	1319
73824	73823	0	Insertion (tandem repeat)	(GCGGGAGCGAGGGCTGCTGCGGCGGCGGCGCG)9 -> (GCGGGAGCGAGGGCTGCTGCGGCGGCGGCGCG)10
73916	73947	32	Deletion (tandem repeat)	(GCGGGAGCGAGGGCTGCTGCGGCGGCGGCGCG)9 -> (GCGGGAGCGAGGGCTGCTGCGGCGGCGGCGCG)8
74815	74815	1	SNP (transition)	A -> G	GTA -> GCA	V -> A	Substitution	tegument protein CDS	1343
74829	74829	1	SNP (transition)	A -> G	AGT -> AGC		None	tegument protein CDS	1329
74941	74941	1	SNP (transition)	T -> C	TAT -> TGT	Y -> C	Substitution	tegument protein CDS	1217
75571	75571	1	SNP (transition)	T -> C	CAT -> CGT	H -> R	Substitution	tegument protein CDS	587
75660	75660	1	SNP (transition)	A -> G	ACT -> ACC		None	tegument protein CDS	498
76703	76703	1	SNP (transition)	T -> C
77127	77127	1	SNP (transversion)	T -> G	CTT -> CTG		None	integral membrane protein CDS	402
78892	78892	1	SNP (transition)	A -> G	GCA -> GCG		None	major capsid protein CDS	1257
81459	81459	1	SNP (transition)	G -> A	AGG -> AAG	R -> K	Substitution	major capsid protein CDS	3824
84465	84465	1	SNP (transition)	G -> A	AGT -> AAT	S -> N	Substitution	putative product ORF45 CDS	53
86903	86903	1	SNP (transversion)	G -> C	GTG -> GTC		None	tegument protein CDS	351
90811	90811	1	SNP (transition)	C -> T	CTG -> TTG		None	tegument protein CDS	1510
92166	92166	1	SNP (transition)	T -> C	TCG -> CCG	S -> P	Substitution	deoxyribonuclease CDS	1099
95394	95394	1	SNP (transition)	G -> A	GAC -> AAC	D -> N	Substitution	origin binding protein CDS	1072
102258	102258	1	SNP (transversion)	C -> A	CGA -> CTA	R -> L	Substitution	minor capsid protein CDS	65
103442	103442	1	SNP (transversion)	A -> C	ACA -> ACC		None	component of DNA helicase-primase complex CDS	1137
104012	104012	1	SNP (transition)	G -> A	GGG -> GGA		None	component of DNA helicase-primase complex CDS	1707
104716	104716	1	SNP (transition)	G -> A	AGG -> AAG	R -> K	Substitution	component of DNA helicase-primase complex CDS	2411
106311	106311	1	SNP (transversion)	C -> A	GAC -> TAC	D -> Y	Substitution	unknown CDS	37
106751	106751	1	SNP (transition)	G -> A	CGC -> CGT		None	unknown CDS	297
107935	107935	1	SNP (transition)	T -> C	GAA -> GAG		None	uracil-DNA glycosylase CDS	141
108594	108594	1	SNP (transition)	G -> A	GTC -> GTT		None	envelope glycoprotein H CDS	141
108682	108682	1	SNP (transition)	T -> C	CAA -> CGA	Q -> R	Substitution	envelope glycoprotein H CDS	53
108991	108991	1	SNP (transition)	A -> G
108992	108992	1	SNP (transversion)	A -> C
109144	109144	1	SNP (transition)	A -> G
109256	109256	1	SNP (transition)	G -> A
109319	109319	1	SNP (transition)	A -> G
109423	109423	1	SNP (transition)	G -> A
109747	109747	1	SNP (transition)	G -> A
109757	109757	1	SNP (transition)	A -> G
110244	110244	1	SNP (transversion)	T -> A
110472	110472	1	SNP (transition)	A -> G	TTG -> CTG		None	transcriptional regulator CDS	1480
112353	112354	2	Substitution	CC -> TA
112356	112393	38	Deletion	GCCCTAGCCCCCTGCCCTAGCCCCCTGCCCTAGCCCCC
112395	112395	1	SNP (transition)	G -> A
112491	112490	0	Insertion (tandem repeat)	(CC)4 -> (CC)5
112794	112794	1	SNP (transversion)	A -> C
112885	112884	0	Insertion (tandem repeat)	(CC)3 -> (CC)4
112937	112937	1	Deletion (tandem repeat)	(G)9 -> (G)8
112946	112946	1	SNP (transition)	C -> T
113051	113053	3	Substitution	AGG -> TTC
113087	113487	401	Deletion	-TAGTGACGTAGCGGAAGGGGAGGAGCAGGAAGGGGAGGAGCAGGAAGGGGAGGAGCAGGAAGGGGAGGAGCAGGAAGGGGAGGAGCAGGAAGGGGAGGAGCAGGAAGGGGAGGAGCAGGAAGGGGAGGAGCAGGAAGGGGAGGAGCAGGAAGGGGAGGAGCAGGAAGGGGAGGAGCAGGAAGGGGAGGAGCAGGAAGGGGAGGAGCAGGAAGGGGAGGAGCAGGAAGGGGAGGAGCAGGAAGGGGAGGAGCAGGAAGGGGAGGAGCAGGAACCATCAACCCGCCCATCAACCCGCCCATCAACCCGCCCATCAACCCGCCCATCAACCCGCCCATCAACCCGCCCATCAACCCGCCCATCAACCCGCCCATCAACCCGCCCATCAACCCGCCCATCAA…
114948	114948	1	SNP (transversion)	T -> G	CGA -> CGC		None	transcriptional regulator CDS	3351
116357	116357	1	SNP (transversion)	A -> T	TCC -> ACC	S -> T	Substitution	transcriptional regulator CDS	1942
118233	118233	1	SNP (transversion)	T -> G	GGA -> GGC		None	transcriptional regulator CDS	66
118421	118421	1	SNP (transition)	G -> A
118738	118738	1	SNP (transition)	T -> C
119105	119104	0	Insertion (tandem repeat)	(C)7 -> (C)8
119944	119946	3	Deletion	CCC -> GGG
119959	119959	1	SNP (transition)	G -> A
120265	120293	29	Deletion	TGGGGGGGGCAAAAATTTTTGAGCGCAAC
120327	120330	4	Deletion (tandem repeat)	(GG)6 -> (GG)4
120436	120435	0	Insertion (tandem repeat)	(G)5 -> (G)6
121008	121048	41	Deletion	AGCTCCGGCGACCCCGGCCCAGCCCAGCTCCGGCGACCCCG
122347	122347	1	SNP (transition)	C -> T
122425	122427	3	Deletion	GGT
123452	123453	2	Deletion (tandem repeat)	(GG)5 -> (GG)4
123548	123548	1	SNP (transition)	G -> A
123578	123592	15	Deletion	GCCGAGCGGGGGAGA
123604	123629	26	Deletion	GGCCGAGCGGGGGAGAGCGGTAGGGG
123890	123890	1	SNP (transition)	A -> G	TTT -> TCT	F -> S	Substitution	IR6 CDS	782
123913	123913	1	SNP (transition)	C -> T	CAG -> CAA		None	IR6 CDS	759
124708	124707	0	Insertion	+C			Frame Shift	ORF68 CDS	1044
124751	124751	1	SNP (transition)	T -> C	ACC -> GCC	T -> A	Substitution	ORF68 CDS	1000
124997	124997	1	SNP (transition)	A -> G	TGG -> CGG	W -> R	Substitution	ORF68 CDS	754
124997	124997	1	SNP (transition)	A -> G	TGG -> CGG	W -> R	Substitution	truncated virion membrane protein CDS	754
125038	125038	1	SNP (transversion)	G -> T	CCG -> CAG	P -> Q	Substitution	ORF68 CDS	713
125038	125038	1	SNP (transversion)	G -> T	CCG -> CAG	P -> Q	Substitution	truncated virion membrane protein CDS	713
125041	125041	1	SNP (transversion)	A -> C	CTG -> CGG	L -> R	Substitution	ORF68 CDS	710
125041	125041	1	SNP (transversion)	A -> C	CTG -> CGG	L -> R	Substitution	truncated virion membrane protein CDS	710
125415	125415	1	SNP (transition)	A -> G	CTT -> CTC		None	ORF68 CDS	336
125415	125415	1	SNP (transition)	A -> G	CTT -> CTC		None	truncated virion membrane protein CDS	336
127176	127176	1	SNP (transition)	C -> T	GCC -> GCT		None	envelope glycoprotein G CDS	21
128202	128202	1	SNP (transition)	C -> T	GGC -> GGT		None	envelope glycoprotein G CDS	1047
129144	129144	1	SNP (transition)	G -> A	ACG -> ACA		None	envelope glycoprotein CDS	573
129159	129159	1	SNP (transition)	G -> A	ACG -> ACA		None	envelope glycoprotein CDS	588
129174	129174	1	SNP (transition)	G -> A	ACG -> ACA		None	envelope glycoprotein CDS	603
129189	129189	1	SNP (transition)	G -> A	ACG -> ACA		None	envelope glycoprotein CDS	618
129325	129327	2	Substitution	ACC -> GCA	ACC -> GCA	T -> A	Substitution	envelope glycoprotein CDS	754
129337	129336	0	Insertion	GCTACCACCACCGCG	-> GCT,ACC,ACC,ACC,GCG	-> ATTTA	Insertion	envelope glycoprotein CDS	766
129348	129348	1	SNP (transition)	T -> C	ACT -> ACC		None	envelope glycoprotein CDS	777
129420	129434	15	Deletion (tandem repeat)	(GCGGCTACCACCACC)13 -> (GCGGCTACCACCACC)12	ACC,ACC,GCG,GCT,ACC,ACC -> ACC	TTAATT -> T	Deletion	envelope glycoprotein CDS	849
132945	132945	1	SNP (transition)	T -> C	GTC -> GCC	V -> A	Substitution	envelope glycoprotein I CDS	365
137276	137276	1	SNP (transversion)	T -> G
137279	137279	1	SNP (transversion)	C -> A
137320	137320	1	SNP (transition)	T -> C
137566	137566	1	SNP (transition)	A -> G
137610	137609	0	Insertion	G
138404	138404	1	SNP (transition)	G -> A	CAG -> CAA		None	IR6 CDS	759
138427	138427	1	SNP (transition)	T -> C	TTT -> TCT	F -> S	Substitution	IR6 CDS	782
138700	138741	42	Deletion	TCCCCCGCTCGGCCTCCCCTACCGCTCTCCCCCGCTCGGCCT
138769	138769	1	SNP (transition)	C -> T
138856	138857	2	Deletion (tandem repeat)	(CC)5 -> (CC)4
139881	139882	2	Deletion (tandem repeat)	(CC)4 -> (CC)3
139970	139970	1	SNP (transition)	G -> A
141163	141235	73	Deletion	TGGTGGACGGCGTCCCCCGCTGGGCCATGCGGCAGGATCCGTCGCACGCCCCGCACGGCTGTCCGTGGGGCAT	ATG,CCC,CAC,GGA,CAG,CCG,TGC,GGG,GCG,TGC,GAC,GGA,TCC,TGC,CGC,ATG,GCC,CAG,CGG,GGG,ACG,CCG,TCC,ACC,AGC ->	MPHGQPCGACDGSCRMAQRGTPSTS ->	Start Codon Loss	putative host range determinant protein CDS	1
141236	141256	21	Deletion	GGCTGGGCCGGGGTCGCCGGA
141877	141876	0	Insertion (tandem repeat)	(C)5 -> (C)6
141978	141981	4	Deletion (tandem repeat)	(CC)6 -> (CC)4
142028	142051	24	Deletion	CGCTCAAAAATTTTTGCCCCCCCC
142358	142358	1	SNP (transition)	C -> T
142366	142367	2	Deletion (tandem repeat)	(GG)4 -> (GG)3
143206	143205	0	Insertion (tandem repeat)	(G)7 -> (G)8
143579	143579	1	SNP (transition)	A -> G
143896	143896	1	SNP (transition)	C -> T
144084	144084	1	SNP (transversion)	A -> C	GGA -> GGC		None	transcriptional regulator CDS	66
145960	145960	1	SNP (transversion)	T -> A	TCC -> ACC	S -> T	Substitution	transcriptional regulator CDS	1942
147369	147369	1	SNP (transversion)	A -> C	CGA -> CGC		None	transcriptional regulator CDS	3351
148826	148938	113	Deletion	GGGCGGGTTGATGGGCGGGTTGATGGGCGGGTTGATGGGCGGGTTGATGGGCGGGTTGATGGGCGGGTTGATGGGCGGGTTGATGGGCGGGTTGATGGGCGGGTTGATGGGCG
148949	148949	1	SNP (transition)	C -> T
148960	148960	1	SNP (transition)	T -> C
148989	148989	1	Insertion	C -> TGG
149034	149227	194	Deletion	CTTCCTGCTCCTCCCCTTCCTGCTCCTCCCCTTCCTGCTCCTCCCCTTCCTGCTCCTCCCCTTCCTGCTCCTCCCCTTCCTGCTCCTCCCCTTCCTGCTCCTCCCCTTCCTGCTCCTCCCCTTCCTGCTCCTCCCCTTCCTGCTCCTCCCCTTCCTGCTCCTCCCCTTCCTGCTCCTCCCCTTCCGCTACGTCA
149264	149266	3	Substitution	CCT -> GAA
149371	149372	2	Deletion	GC -> A

## Sheet: ST4-LS080124
Minimum	Maximum	Length	Polymorphism Type	Change	Codon Change	Amino Acid Change	Protein Effect	CDS	CDS Position
127	143	17	Deletion (tandem repeat)	(AGGCCACGCCCACTGGG)12 -> (AGGCCACGCCCACTGGG)11
225	224	0	Insertion (tandem repeat)	(AGGCCACGCCCACTGGG)12 -> (AGGCCACGCCCACTGGG)13
580	615	36	Deletion (tandem repeat)	(TGGGGCTCACTGCTATGC)19 -> (TGGGGCTCACTGCTATGC)17
633	632	0	Insertion (tandem repeat)	(TGGGGCTCACTGCTATGC)19 -> (TGGGGCTCACTGCTATGC)21
876	876	1	SNP (transition)	C -> T
5517	5517	1	SNP (transversion)	A -> C	GTC -> GGC	V -> G	Substitution	unknown CDS	341
5585	5585	1	SNP (transition)	C -> T	GCG -> GCA		None	unknown CDS	273
5893	5892	0	Insertion (tandem repeat)	(TG)2 -> (TG)3
5898	5898	1	SNP (transition)	C -> T
6142	6142	1	SNP (transition)	C -> T	AAG -> AAA		None	glycoprotein K CDS	882
6330	6330	1	SNP (transition)	A -> G	TTG -> CTG		None	glycoprotein K CDS	694
6805	6805	1	SNP (transition)	G -> A	AGC -> AGT		None	glycoprotein K CDS	219
7437	7437	1	SNP (transition)	G -> A	TCT -> TTT	S -> F	Substitution	primase CDS	2846
10620	10620	1	SNP (transition)	A -> G	AAC -> GAC	N -> D	Substitution	unknown CDS	340
11158	11158	1	SNP (transition)	G -> A	TCC -> TCT		None	deoxyuridine triphosphatase CDS	939
11761	11761	1	SNP (transversion)	G -> T	CGC -> CGA		None	deoxyuridine triphosphatase CDS	336
13094	13094	1	SNP (transversion)	A -> C	AAG -> CAG	K -> Q	Substitution	tegument protein CDS	565
13277	13277	1	SNP (transversion)	G -> T	GCT -> TCT	A -> S	Substitution	tegument protein CDS	748
15178	15178	1	SNP (transversion)	C -> G
15383	15383	1	SNP (transversion)	C -> A	CGC -> CGA		None	tegument protein CDS	84
16213	16213	1	SNP (transition)	T -> C	TTA -> TCA	L -> S	Substitution	tegument protein CDS	914
16512	16512	1	SNP (transition)	G -> A	GCA -> ACA	A -> T	Substitution	tegument protein CDS	1213
16677	16677	1	SNP (transition)	A -> G	ACC -> GCC	T -> A	Substitution	tegument protein CDS	1378
17110	17110	1	SNP (transversion)	C -> G	GCT -> GGT	A -> G	Substitution	tegument protein CDS	1811
17209	17209	1	SNP (transition)	C -> T	GCA -> GTA	A -> V	Substitution	tegument protein CDS	1910
17646	17646	1	SNP (transition)	C -> T	CTA -> TTA		None	tegument protein CDS	2347
19746	19746	1	SNP (transition)	A -> G	AAT -> GAT	N -> D	Substitution	tegument protein CDS	1681
21491	21491	1	SNP (transition)	A -> G	GTT -> GTC		None	glycoprotein C CDS	1353
22271	22271	1	SNP (transition)	C -> T	ACG -> ACA		None	glycoprotein C CDS	573
23249	23249	1	SNP (transition)	A -> G	ATT -> ATC		None	putative integral membrane protein CDS	978
27258	27259	2	Substitution	GG -> AA	TCG,GAT -> TCA,AAT	SD -> SN	Substitution	tegument protein CDS	1005
28116	28116	1	SNP (transition)	A -> G	TTG -> CTG		None	small subunit of ribonucleotide reductase CDS	736
29981	29981	1	SNP (transition)	C -> T	GGT -> AGT	G -> S	Substitution	large subunit of ribonucleotide reductase CDS	1288
31502	31501	0	Insertion	G
31620	31620	1	SNP (transition)	G -> A	CCC -> TCC	P -> S	Substitution	capsid protein CDS	1288
31692	31692	1	SNP (transition)	A -> G	TTG -> CTG		None	capsid protein CDS	1216
32059	32059	1	SNP (transition)	G -> A	AGC -> AGT		None	capsid protein CDS	849
39071	39071	1	SNP (transition)	T -> C	ATT -> ATC		None	very large tegument protein CDS	2493
44334	44334	1	SNP (transition)	A -> G	AGC -> GGC	S -> G	Substitution	very large tegument protein CDS	7756
44872	44873	2	Substitution	CC -> GG	GCC -> GGG	A -> G	Substitution	very large tegument protein CDS	8294
44874	44875	2	Substitution	CC -> GT	CCC -> GTC	P -> V	Substitution	very large tegument protein CDS	8296
44877	44879	2	Substitution	GCC -> TCT	GCC -> TCT	A -> S	Substitution	very large tegument protein CDS	8299
44880	44880	1	SNP (transition)	G -> A	GCG -> ACG	A -> T	Substitution	very large tegument protein CDS	8302
44885	44886	2	Substitution	CC -> TT	GCC,CCG -> GCT,TCG	AP -> AS	Substitution	very large tegument protein CDS	8307
44887	44887	1	SNP (transition)	C -> T	CCG -> CTG	P -> L	Substitution	very large tegument protein CDS	8309
44887	44888	2	Substitution	CG -> GC	CCG -> CGC	P -> R	Substitution	very large tegument protein CDS	8309
44892	44897	5	Substitution	AAATCT -> GGGGCC	AAA,TCT -> GGG,GCC	KS -> GA	Substitution	very large tegument protein CDS	8314
44905	44906	2	Substitution	CC -> AA	GCC -> GAA	A -> E	Substitution	very large tegument protein CDS	8327
44907	44908	2	Substitution	CC -> GA	CCC -> GAC	P -> D	Substitution	very large tegument protein CDS	8329
44910	44912	3	Substitution	GCC -> CAA	GCC -> CAA	A -> Q	Substitution	very large tegument protein CDS	8332
44913	44913	1	SNP (transition)	G -> A	GCG -> ACG	A -> T	Substitution	very large tegument protein CDS	8335
44915	44921	6	Substitution	GGCCCCG -> AAAATCA	GCG,GCC,CCG -> GCA,AAA,TCA	AAP -> AKS	Substitution	very large tegument protein CDS	8337
44927	44952	25	Deletion	ATCTGCGGCGGCCCCCGCCGCGGCCC -> CGG			Frame Shift	very large tegument protein CDS	8349
44956	44958	3	Substitution	CCA -> GGG	GCC,AAA -> GGG,GAA	AK -> GE	Substitution	very large tegument protein CDS	8378
44974	44975	2	Substitution	CC -> TG	CCC -> CTG	P -> L	Substitution	very large tegument protein CDS	8396
45047	45047	1	SNP (transition)	T -> C	GCT -> GCC		None	very large tegument protein CDS	8469
45048	45050	3	Substitution	GAA -> CCC	GAA -> CCC	E -> P	Substitution	very large tegument protein CDS	8470
45052	45052	1	SNP (transition)	T -> C	GTC -> GCC	V -> A	Substitution	very large tegument protein CDS	8474
45054	45056	2	Substitution	CCA -> GCG	CCA -> GCG	P -> A	Substitution	very large tegument protein CDS	8476
45057	45059	3	Substitution	AAG -> GCC	AAG -> GCC	K -> A	Substitution	very large tegument protein CDS	8479
45068	45068	1	SNP (transition)	G -> A	AAG -> AAA		None	very large tegument protein CDS	8490
45074	45077	3	Substitution	GGCC -> AACA	CAG,GCC -> CAA,ACA	QA -> QT	Substitution	very large tegument protein CDS	8496
45080	45080	1	SNP (transition)	G -> A	AAG -> AAA		None	very large tegument protein CDS	8502
45081	45082	2	Substitution	GA -> TC	GAC -> TCC	D -> S	Substitution	very large tegument protein CDS	8503
45083	45083	1	SNP (transversion)	C -> A	GAC -> GAA	D -> E	Substitution	very large tegument protein CDS	8505
45084	45084	1	SNP (transversion)	C -> G	CAG -> GAG	Q -> E	Substitution	very large tegument protein CDS	8506
45084	45085	2	Substitution	CA -> AC	CAG -> ACG	Q -> T	Substitution	very large tegument protein CDS	8506
45086	45086	1	SNP (transversion)	G -> T	CAG -> CAT	Q -> H	Substitution	very large tegument protein CDS	8508
45089	45089	1	SNP (transition)	C -> T	GCC -> GCT		None	very large tegument protein CDS	8511
45090	45092	2	Substitution	AAG -> GAA	AAG -> GAA	K -> E	Substitution	very large tegument protein CDS	8512
45094	45094	1	SNP (transversion)	A -> T	GAC -> GTC	D -> V	Substitution	very large tegument protein CDS	8516
45101	45101	1	SNP (transversion)	C -> A	GCC -> GCA		None	very large tegument protein CDS	8523
45105	45107	3	Deletion	GAC	GAC ->	D ->	Deletion	very large tegument protein CDS	8527
45109	45109	1	SNP (transversion)	A -> C	CAG -> CCG	Q -> P	Substitution	very large tegument protein CDS	8531
45255	45255	1	SNP (transition)	T -> C	TTG -> CTG		None	very large tegument protein CDS	8677
47847	47847	1	SNP (transversion)	T -> A	TCA -> TCT		None	membrane associated phosphoprotein CDS	318
49041	49041	1	SNP (transition)	T -> C	CTT -> CTC		None	DNA packaging protein CDS	345
49989	49989	1	SNP (transition)	C -> T	GCC -> GCT		None	DNA packaging protein CDS	1293
50586	50586	1	SNP (transversion)	A -> C	AAG -> ACG	K -> T	Substitution	unknown CDS	35
52151	52151	1	SNP (transition)	T -> C	AAG -> GAG	K -> E	Substitution	DNA polymerase CDS	2968
53135	53135	1	SNP (transversion)	T -> G	AGT -> CGT	S -> R	Substitution	DNA polymerase CDS	1984
54195	54195	1	SNP (transition)	A -> G	TTT -> TTC		None	DNA polymerase CDS	924
55378	55378	1	SNP (transition)	A -> G
55655	55655	1	SNP (transition)	G -> A	AGC -> AAC	S -> N	Substitution	ssDNA binding protein CDS	269
58401	58401	1	SNP (transversion)	C -> A	CGC -> CGA		None	ssDNA binding protein CDS	3015
59301	59301	1	SNP (transition)	T -> C	TTG -> TCG	L -> S	Substitution	DNA packaging protein CDS	125
62709	62709	1	SNP (transition)	A -> G	TCA -> TCG		None	envelope glycoprotein B CDS	1344
64667	64667	1	SNP (transversion)	G -> T	CAG -> CAT	Q -> H	Substitution	unknown CDS	156
64708	64708	1	SNP (transition)	G -> A	GGT -> GAT	G -> D	Substitution	unknown CDS	197
64814	64814	1	SNP (transversion)	C -> A	GCC -> GCA		None	unknown CDS	303
67161	67161	1	SNP (transversion)	C -> A	TTG -> TTT	L -> F	Substitution	unknown CDS	1749
67696	67696	1	SNP (transition)	C -> T	AGA -> AAA	R -> K	Substitution	unknown CDS	1214
68771	68771	1	SNP (transversion)	G -> T	CGC -> AGC	R -> S	Substitution	unknown CDS	139
70274	70274	1	SNP (transversion)	G -> T	TCG -> TCT		None	thymidine kinase CDS	432
72443	72443	1	SNP (transition)	T -> C	TTA -> TCA	L -> S	Substitution	envelope glycoprotein H CDS	1319
73858	73858	1	Deletion	G
73885	73890	6	Deletion (tandem repeat)	(GCG)4 -> (GCG)2
73917	73922	6	Deletion (tandem repeat)	(GCG)4 -> (GCG)2
73954	73954	1	Deletion	G
73981	73986	6	Deletion (tandem repeat)	(GCG)4 -> (GCG)2
74013	74018	6	Deletion (tandem repeat)	(GCG)4 -> (GCG)2
74045	74050	6	Deletion (tandem repeat)	(GCG)4 -> (GCG)2
74815	74815	1	SNP (transition)	A -> G	GTA -> GCA	V -> A	Substitution	tegument protein CDS	1343
74829	74829	1	SNP (transition)	A -> G	AGT -> AGC		None	tegument protein CDS	1329
74941	74941	1	SNP (transition)	T -> C	TAT -> TGT	Y -> C	Substitution	tegument protein CDS	1217
75571	75571	1	SNP (transition)	T -> C	CAT -> CGT	H -> R	Substitution	tegument protein CDS	587
75660	75660	1	SNP (transition)	A -> G	ACT -> ACC		None	tegument protein CDS	498
76703	76703	1	SNP (transition)	T -> C
77127	77127	1	SNP (transversion)	T -> G	CTT -> CTG		None	integral membrane protein CDS	402
78892	78892	1	SNP (transition)	A -> G	GCA -> GCG		None	major capsid protein CDS	1257
81459	81459	1	SNP (transition)	G -> A	AGG -> AAG	R -> K	Substitution	major capsid protein CDS	3824
84465	84465	1	SNP (transition)	G -> A	AGT -> AAT	S -> N	Substitution	putative product ORF45 CDS	53
84803	84803	1	SNP (transition)	C -> T	CTG -> TTG		None	putative product ORF45 CDS	391
85276	85276	1	SNP (transition)	T -> C	GGT -> GGC		None	putative product ORF45 CDS	864
86903	86903	1	SNP (transversion)	G -> C	GTG -> GTC		None	tegument protein CDS	351
90811	90811	1	SNP (transition)	C -> T	CTG -> TTG		None	tegument protein CDS	1510
92166	92166	1	SNP (transition)	T -> C	TCG -> CCG	S -> P	Substitution	deoxyribonuclease CDS	1099
95394	95394	1	SNP (transition)	G -> A	GAC -> AAC	D -> N	Substitution	origin binding protein CDS	1072
103442	103442	1	SNP (transversion)	A -> C	ACA -> ACC		None	component of DNA helicase-primase complex CDS	1137
104012	104012	1	SNP (transition)	G -> A	GGG -> GGA		None	component of DNA helicase-primase complex CDS	1707
104716	104716	1	SNP (transition)	G -> A	AGG -> AAG	R -> K	Substitution	component of DNA helicase-primase complex CDS	2411
106751	106751	1	SNP (transition)	G -> A	CGC -> CGT		None	unknown CDS	297
107935	107935	1	SNP (transition)	T -> C	GAA -> GAG		None	uracil-DNA glycosylase CDS	141
108682	108682	1	SNP (transition)	T -> C	CAA -> CGA	Q -> R	Substitution	envelope glycoprotein H CDS	53
108745	108745	1	SNP (transversion)	G -> T
109144	109144	1	SNP (transition)	A -> G
109256	109256	1	SNP (transition)	G -> A
109319	109319	1	SNP (transition)	A -> G
109423	109423	1	SNP (transition)	G -> A
109747	109747	1	SNP (transition)	G -> A
109757	109757	1	SNP (transition)	A -> G
110244	110244	1	SNP (transversion)	T -> A
110472	110472	1	SNP (transition)	A -> G	TTG -> CTG		None	transcriptional regulator CDS	1480
111238	111238	1	SNP (transition)	C -> T	ACG -> ACA		None	transcriptional regulator CDS	714
112344	112403	60	Deletion	CCCTAGCCCCCTGCCCTAGCCCCCTGCCCTAGCCCCCTGCCCTAGCCCCCTGCCCTAGCC
112484	112483	0	Insertion (tandem repeat)	(CC)4 -> (CC)5
112794	112794	1	SNP (transversion)	A -> C
112892	112892	1	SNP (transversion)	A -> C
112937	112936	0	Insertion (tandem repeat)	(G)9 -> (G)10
112946	112946	1	SNP (transition)	C -> T
113051	113053	3	Substitution	AGG -> TTC
113143	113488	346	Deletion	AGGAAGGGGAGGAGCAGGAAGGGGAGGAGCAGGAAGGGGAGGAGCAGGAAGGGGAGGAGCAGGAAGGGGAGGAGCAGGAAGGGGAGGAGCAGGAAGGGGAGGAGCAGGAAGGGGAGGAGCAGGAAGGGGAGGAGCAGGAAGGGGAGGAGCAGGAAGGGGAGGAGCAGGAAGGGGAGGAGCAGGAAGGGGAGGAGCAGGAAGGGGAGGAGCAGGAACCATCAACCCGCCCATCAACCCGCCCATCAACCCGCCCATCAACCCGCCCATCAACCCGCCCATCAACCCGCCCATCAACCCGCCCATCAACCCGCCCATCAACCCGCCCATCAACCCGCCCATCAACCCG
114851	114851	1	SNP (transversion)	T -> G	AAC -> CAC	N -> H	Substitution	transcriptional regulator CDS	3448
114948	114948	1	SNP (transversion)	T -> G	CGA -> CGC		None	transcriptional regulator CDS	3351
116357	116357	1	SNP (transversion)	A -> T	TCC -> ACC	S -> T	Substitution	transcriptional regulator CDS	1942
117476	117476	1	SNP (transversion)	C -> A	GCT -> TCT	A -> S	Substitution	transcriptional regulator CDS	823
118065	118065	1	SNP (transition)	T -> C	GGA -> GGG		None	transcriptional regulator CDS	234
118233	118233	1	SNP (transversion)	T -> G	GGA -> GGC		None	transcriptional regulator CDS	66
118421	118421	1	SNP (transition)	G -> A
118738	118738	1	SNP (transition)	T -> C
119105	119104	0	Insertion (tandem repeat)	(C)7 -> (C)8
119959	119959	1	SNP (transition)	G -> A
120264	120288	25	Deletion	GTGGGGGGGGCAAAAATTTTTGAGC
120330	120333	4	Deletion (tandem repeat)	(GG)6 -> (GG)4
120437	120436	0	Insertion (tandem repeat)	(G)5 -> (G)6
120989	120989	1	SNP (transition)	G -> A
120990	120990	1	SNP (transversion)	G -> C
120991	120991	1	SNP (transversion)	C -> G
120995	120995	1	SNP (transversion)	C -> A
120996	121081	86	Deletion	CCGGCCCAGCCCAGCTCCGGCGACCCCGGCCCAGCCCAGCTCCGGCGACCCCGGCCCAGCCCAGCTCCGGCGACCCCGGCCCAGCC
121082	121155	74	Deletion	ATGCCCCACGGACAGCCGTGCGGGGCGTGCGACGGATCCTGCCGCATGGCCCAGCGGGGGACGCCGTCCACCAG	ATG,CCC,CAC,GGA,CAG,CCG,TGC,GGG,GCG,TGC,GAC,GGA,TCC,TGC,CGC,ATG,GCC,CAG,CGG,GGG,ACG,CCG,TCC,ACC,AGC ->	MPHGQPCGACDGSCRMAQRGTPSTS ->	Start Codon Loss	putative host range determinant protein CDS	1
121156	121156	1	SNP (transversion)	C -> G	AGC -> AGG	S -> R	Substitution	putative host range determinant protein CDS	75
121366	121366	1	SNP (transversion)	G -> T	GTG -> GTT		None	putative host range determinant protein CDS	285
122060	122060	1	SNP (transition)	C -> T
122347	122347	1	SNP (transition)	C -> T
122418	122427	10	Deletion	AGGGTGGGGT
122429	122429	1	SNP (transversion)	G -> T
123452	123453	2	Deletion (tandem repeat)	(GG)5 -> (GG)4
123548	123548	1	SNP (transition)	G -> A
123890	123890	1	SNP (transition)	A -> G	TTT -> TCT	F -> S	Substitution	IR6 CDS	782
123913	123913	1	SNP (transition)	C -> T	CAG -> CAA		None	IR6 CDS	759
124708	124707	0	Insertion	C			Frame Shift	ORF68 CDS	1044
124751	124751	1	SNP (transition)	T -> C	ACC -> GCC	T -> A	Substitution	ORF68 CDS	1000
124997	124997	1	SNP (transition)	A -> G	TGG -> CGG	W -> R	Substitution	ORF68 CDS	754
124997	124997	1	SNP (transition)	A -> G	TGG -> CGG	W -> R	Substitution	truncated virion membrane protein CDS	754
125038	125038	1	SNP (transversion)	G -> T	CCG -> CAG	P -> Q	Substitution	ORF68 CDS	713
125038	125038	1	SNP (transversion)	G -> T	CCG -> CAG	P -> Q	Substitution	truncated virion membrane protein CDS	713
125041	125041	1	SNP (transversion)	A -> C	CTG -> CGG	L -> R	Substitution	ORF68 CDS	710
125041	125041	1	SNP (transversion)	A -> C	CTG -> CGG	L -> R	Substitution	truncated virion membrane protein CDS	710
125415	125415	1	SNP (transition)	A -> G	CTT -> CTC		None	ORF68 CDS	336
125415	125415	1	SNP (transition)	A -> G	CTT -> CTC		None	truncated virion membrane protein CDS	336
127176	127176	1	SNP (transition)	C -> T	GCC -> GCT		None	envelope glycoprotein G CDS	21
129144	129144	1	SNP (transition)	G -> A	ACG -> ACA		None	envelope glycoprotein CDS	573
129159	129159	1	SNP (transition)	G -> A	ACG -> ACA		None	envelope glycoprotein CDS	588
129174	129174	1	SNP (transition)	G -> A	ACG -> ACA		None	envelope glycoprotein CDS	603
129189	129189	1	SNP (transition)	G -> A	ACG -> ACA		None	envelope glycoprotein CDS	618
129325	129327	2	Substitution	ACC -> GCA	ACC -> GCA	T -> A	Substitution	envelope glycoprotein CDS	754
129342	129342	1	SNP (transition)	C -> T	ACC -> ACT		None	envelope glycoprotein CDS	771
129345	129345	1	SNP (transition)	C -> T	ACC -> ACT		None	envelope glycoprotein CDS	774
129346	129346	1	SNP (transversion)	A -> T	ACT -> TCT	T -> S	Substitution	envelope glycoprotein CDS	775
129348	129348	1	SNP (transition)	T -> C	ACT -> ACC		None	envelope glycoprotein CDS	777
129349	129351	2	Substitution	GCG -> TCT	GCG -> TCT	A -> S	Substitution	envelope glycoprotein CDS	778
129354	129354	1	SNP (transversion)	T -> A	GCT -> GCA		None	envelope glycoprotein CDS	783
129372	129372	1	SNP (transition)	C -> T	ACC -> ACT		None	envelope glycoprotein CDS	801
129381	129381	1	SNP (transversion)	G -> T	GCG -> GCT		None	envelope glycoprotein CDS	810
132945	132945	1	SNP (transition)	T -> C	GTC -> GCC	V -> A	Substitution	envelope glycoprotein I CDS	365
137276	137276	1	SNP (transversion)	T -> G
137279	137279	1	SNP (transversion)	C -> A
137320	137320	1	SNP (transition)	T -> C
137566	137566	1	SNP (transition)	A -> G
137610	137609	0	Insertion	G
138404	138404	1	SNP (transition)	G -> A	CAG -> CAA		None	IR6 CDS	759
138427	138427	1	SNP (transition)	T -> C	TTT -> TCT	F -> S	Substitution	IR6 CDS	782
138688	138688	1	SNP (transition)	C -> T
138692	138695	4	Substitution	TACC -> CTTT
138697	138697	1	SNP (transition)	C -> T
138699	138699	1	SNP (transition)	C -> T
138701	138703	3	Insertion	CCC -> TTTG
138704	138703	0	Insertion	A
138704	138703	0	Insertion (tandem repeat)	(C)5 -> (C)6
138704	138703	0	Insertion	CA
138704	138703	0	Insertion (tandem repeat)	(C)5 -> (C)6
138704	138703	0	Insertion	G
138704	138703	0	Insertion	TA
138705	138706	2	Substitution	CG -> TA
138712	138712	1	SNP (transition)	C -> T
138714	138714	1	SNP (transition)	T -> C
138716	138716	1	SNP (transversion)	C -> A
138718	138719	2	Substitution	CT -> TC
138721	138726	6	Deletion	CCGCTC
138731	138731	1	SNP (transversion)	C -> A
138732	138732	1	SNP (transversion)	C -> G
138735	138735	1	SNP (transversion)	T -> G
138736	138736	1	SNP (transversion)	C -> G
138737	138737	1	SNP (transversion)	G -> C
138739	138739	1	SNP (transition)	C -> T
138740	138740	1	SNP (transition)	C -> T
138769	138769	1	SNP (transition)	C -> T
138856	138857	2	Deletion (tandem repeat)	(CC)5 -> (CC)4
139878	139885	8	Deletion	CCTCCCCC
139970	139970	1	SNP (transition)	G -> A
140257	140257	1	SNP (transition)	G -> A
140951	140951	1	SNP (transversion)	C -> A	GTG -> GTT		None	putative host range determinant protein CDS	285
141155	141235	81	Deletion	GAGGGGGCTGGTGGACGGCGTCCCCCGCTGGGCCATGCGGCAGGATCCGTCGCACGCCCCGCACGGCTGTCCGTGGGGCAT	ATG,CCC,CAC,GGA,CAG,CCG,TGC,GGG,GCG,TGC,GAC,GGA,TCC,TGC,CGC,ATG,GCC,CAG,CGG,GGG,ACG,CCG,TCC,ACC,AGC,CCC,CTC ->	MPHGQPCGACDGSCRMAQRGTPSTSPL ->	Start Codon Loss	putative host range determinant protein CDS	1
141236	141325	90	Deletion	GGCTGGGCCGGGGTCGCCGGAGCTGGGCTGGGCCGGGGTCGCCGGAGCTGGGCTGGGCCGGGGTCGCCGGAGCTGGGCTGGGCCGGGGTC
141877	141876	0	Insertion (tandem repeat)	(C)5 -> (C)6
141961	142054	94	Deletion	GTAACCGTATTTTAGCGCCCCCCCCCCCCCATAGCCGCATACCGTAACCCAGCCATGCTATCTGTTGCGCTCAAAAATTTTTGCCCCCCCCACC
142358	142358	1	SNP (transition)	C -> T
142369	142376	8	Deletion	GGGGGTGT
143206	143205	0	Insertion (tandem repeat)	(G)7 -> (G)8
143579	143579	1	SNP (transition)	A -> G
143896	143896	1	SNP (transition)	C -> T
144084	144084	1	SNP (transversion)	A -> C	GGA -> GGC		None	transcriptional regulator CDS	66
144252	144252	1	SNP (transition)	A -> G	GGA -> GGG		None	transcriptional regulator CDS	234
144841	144841	1	SNP (transversion)	G -> T	GCT -> TCT	A -> S	Substitution	transcriptional regulator CDS	823
145960	145960	1	SNP (transversion)	T -> A	TCC -> ACC	S -> T	Substitution	transcriptional regulator CDS	1942
147369	147369	1	SNP (transversion)	A -> C	CGA -> CGC		None	transcriptional regulator CDS	3351
147466	147466	1	SNP (transversion)	A -> C	AAC -> CAC	N -> H	Substitution	transcriptional regulator CDS	3448
148811	149074	264	Deletion	ACTGGGCGGGTTGATGGGCGGGTTGATGGGCGGGTTGATGGGCGGGTTGATGGGCGGGTTGATGGGCGGGTTGATGGGCGGGTTGATGGGCGGGTTGATGGGCGGGTTGATGGGCGGGTTGATGGGCGGGTTGATGGGCGGGTTGATGGTTCCTGCTCCTCCCCTTCCTGCTCCTCCCCTTCCTGCTCCTCCCCTTCCTGCTCCTCCCCTTCCTGCTCCTCCCCTTCCTGCTCCTCCCCTTCCTGCTCCTCCCCTTCCTGCTCC
149126	149175	50	Deletion	TCCTGCTCCTCCCCTTCCTGCTCCTCCCCTTCCTGCTCCTCCCCTTCCTG
149264	149266	3	Substitution	CCT -> GAA
149367	149409	43	Deletion	TTTGGCCCCCCCCCTTAGACCACGCCCCCCTATTCAAATGCGG -> C
149412	149413	2	Substitution	GT -> AA
149415	149415	1	SNP (transition)	A -> G
149417	149417	1	SNP (transversion)	A -> C
149417	149417	1	SNP (transition)	A -> G
149419	149419	1	SNP (transversion)	G -> C
149420	149420	1	SNP (transition)	C -> T
149421	149421	1	SNP (transversion)	G -> C
149422	149422	1	SNP (transversion)	G -> C
149423	149423	1	SNP (transversion)	G -> C

## Sheet: ST5-LS100106
Minimum	Maximum	Length	Polymorphism Type	Change	Codon Change	Amino Acid Change	Protein Effect	CDS	CDS Position
127	143	17	Deletion (tandem repeat)	(AGGCCACGCCCACTGGG)12 -> (AGGCCACGCCCACTGGG)11
225	224	0	Insertion (tandem repeat)	(AGGCCACGCCCACTGGG)12 -> (AGGCCACGCCCACTGGG)13
580	615	36	Deletion (tandem repeat)	(TGGGGCTCACTGCTATGC)19 -> (TGGGGCTCACTGCTATGC)17
633	632	0	Insertion (tandem repeat)	(TGGGGCTCACTGCTATGC)19 -> (TGGGGCTCACTGCTATGC)21
876	876	1	SNP (transition)	C -> T
5517	5517	1	SNP (transversion)	A -> C	GTC -> GGC	V -> G	Substitution	unknown CDS	341
5585	5585	1	SNP (transition)	C -> T	GCG -> GCA		None	unknown CDS	273
5893	5892	0	Insertion (tandem repeat)	(TG)2 -> (TG)3
5898	5898	1	SNP (transition)	C -> T
6142	6142	1	SNP (transition)	C -> T	AAG -> AAA		None	glycoprotein K CDS	882
6330	6330	1	SNP (transition)	A -> G	TTG -> CTG		None	glycoprotein K CDS	694
6805	6805	1	SNP (transition)	G -> A	AGC -> AGT		None	glycoprotein K CDS	219
7437	7437	1	SNP (transition)	G -> A	TCT -> TTT	S -> F	Substitution	primase CDS	2846
10620	10620	1	SNP (transition)	A -> G	AAC -> GAC	N -> D	Substitution	unknown CDS	340
11158	11158	1	SNP (transition)	G -> A	TCC -> TCT		None	deoxyuridine triphosphatase CDS	939
11761	11761	1	SNP (transversion)	G -> T	CGC -> CGA		None	deoxyuridine triphosphatase CDS	336
13094	13094	1	SNP (transversion)	A -> C	AAG -> CAG	K -> Q	Substitution	tegument protein CDS	565
13277	13277	1	SNP (transversion)	G -> T	GCT -> TCT	A -> S	Substitution	tegument protein CDS	748
15178	15178	1	SNP (transversion)	C -> G
15383	15383	1	SNP (transversion)	C -> A	CGC -> CGA		None	tegument protein CDS	84
16213	16213	1	SNP (transition)	T -> C	TTA -> TCA	L -> S	Substitution	tegument protein CDS	914
16512	16512	1	SNP (transition)	G -> A	GCA -> ACA	A -> T	Substitution	tegument protein CDS	1213
16677	16677	1	SNP (transition)	A -> G	ACC -> GCC	T -> A	Substitution	tegument protein CDS	1378
17110	17110	1	SNP (transversion)	C -> G	GCT -> GGT	A -> G	Substitution	tegument protein CDS	1811
17209	17209	1	SNP (transition)	C -> T	GCA -> GTA	A -> V	Substitution	tegument protein CDS	1910
17646	17646	1	SNP (transition)	C -> T	CTA -> TTA		None	tegument protein CDS	2347
19746	19746	1	SNP (transition)	A -> G	AAT -> GAT	N -> D	Substitution	tegument protein CDS	1681
21491	21491	1	SNP (transition)	A -> G	GTT -> GTC		None	glycoprotein C CDS	1353
22271	22271	1	SNP (transition)	C -> T	ACG -> ACA		None	glycoprotein C CDS	573
23249	23249	1	SNP (transition)	A -> G	ATT -> ATC		None	putative integral membrane protein CDS	978
27258	27259	2	Substitution	GG -> AA	TCG,GAT -> TCA,AAT	SD -> SN	Substitution	tegument protein CDS	1005
28116	28116	1	SNP (transition)	A -> G	TTG -> CTG		None	small subunit of ribonucleotide reductase CDS	736
29981	29981	1	SNP (transition)	C -> T	GGT -> AGT	G -> S	Substitution	large subunit of ribonucleotide reductase CDS	1288
31502	31501	0	Insertion	G
31620	31620	1	SNP (transition)	G -> A	CCC -> TCC	P -> S	Substitution	capsid protein CDS	1288
31692	31692	1	SNP (transition)	A -> G	TTG -> CTG		None	capsid protein CDS	1216
32059	32059	1	SNP (transition)	G -> A	AGC -> AGT		None	capsid protein CDS	849
39071	39071	1	SNP (transition)	T -> C	ATT -> ATC		None	very large tegument protein CDS	2493
44334	44334	1	SNP (transition)	A -> G	AGC -> GGC	S -> G	Substitution	very large tegument protein CDS	7756
44872	44873	2	Substitution	CC -> GG	GCC -> GGG	A -> G	Substitution	very large tegument protein CDS	8294
44874	44875	2	Substitution	CC -> GT	CCC -> GTC	P -> V	Substitution	very large tegument protein CDS	8296
44877	44879	2	Substitution	GCC -> TCT	GCC -> TCT	A -> S	Substitution	very large tegument protein CDS	8299
44880	44880	1	SNP (transition)	G -> A	GCG -> ACG	A -> T	Substitution	very large tegument protein CDS	8302
44885	44886	2	Substitution	CC -> TT	GCC,CCG -> GCT,TCG	AP -> AS	Substitution	very large tegument protein CDS	8307
44887	44887	1	SNP (transition)	C -> T	CCG -> CTG	P -> L	Substitution	very large tegument protein CDS	8309
44887	44888	2	Substitution	CG -> GC	CCG -> CGC	P -> R	Substitution	very large tegument protein CDS	8309
44892	44897	5	Substitution	AAATCT -> GGGGCC	AAA,TCT -> GGG,GCC	KS -> GA	Substitution	very large tegument protein CDS	8314
44905	44906	2	Substitution	CC -> AA	GCC -> GAA	A -> E	Substitution	very large tegument protein CDS	8327
44907	44908	2	Substitution	CC -> GA	CCC -> GAC	P -> D	Substitution	very large tegument protein CDS	8329
44910	44912	3	Substitution	GCC -> CAA	GCC -> CAA	A -> Q	Substitution	very large tegument protein CDS	8332
44913	44913	1	SNP (transition)	G -> A	GCG -> ACG	A -> T	Substitution	very large tegument protein CDS	8335
44915	44921	6	Substitution	GGCCCCG -> AAAATCA	GCG,GCC,CCG -> GCA,AAA,TCA	AAP -> AKS	Substitution	very large tegument protein CDS	8337
44927	44952	25	Deletion	ATCTGCGGCGGCCCCCGCCGCGGCCC -> CGG			Frame Shift	very large tegument protein CDS	8349
44956	44958	3	Substitution	CCA -> GGG	GCC,AAA -> GGG,GAA	AK -> GE	Substitution	very large tegument protein CDS	8378
44974	44975	2	Substitution	CC -> TG	CCC -> CTG	P -> L	Substitution	very large tegument protein CDS	8396
45047	45047	1	SNP (transition)	T -> C	GCT -> GCC		None	very large tegument protein CDS	8469
45048	45050	3	Substitution	GAA -> CCC	GAA -> CCC	E -> P	Substitution	very large tegument protein CDS	8470
45052	45052	1	SNP (transition)	T -> C	GTC -> GCC	V -> A	Substitution	very large tegument protein CDS	8474
45054	45056	2	Substitution	CCA -> GCG	CCA -> GCG	P -> A	Substitution	very large tegument protein CDS	8476
45057	45059	3	Substitution	AAG -> GCC	AAG -> GCC	K -> A	Substitution	very large tegument protein CDS	8479
45068	45068	1	SNP (transition)	G -> A	AAG -> AAA		None	very large tegument protein CDS	8490
45074	45077	3	Substitution	GGCC -> AACA	CAG,GCC -> CAA,ACA	QA -> QT	Substitution	very large tegument protein CDS	8496
45080	45080	1	SNP (transition)	G -> A	AAG -> AAA		None	very large tegument protein CDS	8502
45081	45082	2	Substitution	GA -> TC	GAC -> TCC	D -> S	Substitution	very large tegument protein CDS	8503
45083	45083	1	SNP (transversion)	C -> A	GAC -> GAA	D -> E	Substitution	very large tegument protein CDS	8505
45084	45084	1	SNP (transversion)	C -> G	CAG -> GAG	Q -> E	Substitution	very large tegument protein CDS	8506
45084	45085	2	Substitution	CA -> AC	CAG -> ACG	Q -> T	Substitution	very large tegument protein CDS	8506
45086	45086	1	SNP (transversion)	G -> T	CAG -> CAT	Q -> H	Substitution	very large tegument protein CDS	8508
45089	45089	1	SNP (transition)	C -> T	GCC -> GCT		None	very large tegument protein CDS	8511
45090	45092	2	Substitution	AAG -> GAA	AAG -> GAA	K -> E	Substitution	very large tegument protein CDS	8512
45094	45094	1	SNP (transversion)	A -> T	GAC -> GTC	D -> V	Substitution	very large tegument protein CDS	8516
45101	45101	1	SNP (transversion)	C -> A	GCC -> GCA		None	very large tegument protein CDS	8523
45105	45107	3	Deletion	GAC	GAC ->	D ->	Deletion	very large tegument protein CDS	8527
45109	45109	1	SNP (transversion)	A -> C	CAG -> CCG	Q -> P	Substitution	very large tegument protein CDS	8531
45255	45255	1	SNP (transition)	T -> C	TTG -> CTG		None	very large tegument protein CDS	8677
47847	47847	1	SNP (transversion)	T -> A	TCA -> TCT		None	membrane associated phosphoprotein CDS	318
49041	49041	1	SNP (transition)	T -> C	CTT -> CTC		None	DNA packaging protein CDS	345
49989	49989	1	SNP (transition)	C -> T	GCC -> GCT		None	DNA packaging protein CDS	1293
50586	50586	1	SNP (transversion)	A -> C	AAG -> ACG	K -> T	Substitution	unknown CDS	35
52151	52151	1	SNP (transition)	T -> C	AAG -> GAG	K -> E	Substitution	DNA polymerase CDS	2968
53135	53135	1	SNP (transversion)	T -> G	AGT -> CGT	S -> R	Substitution	DNA polymerase CDS	1984
54195	54195	1	SNP (transition)	A -> G	TTT -> TTC		None	DNA polymerase CDS	924
55378	55378	1	SNP (transition)	A -> G
55655	55655	1	SNP (transition)	G -> A	AGC -> AAC	S -> N	Substitution	ssDNA binding protein CDS	269
58401	58401	1	SNP (transversion)	C -> A	CGC -> CGA		None	ssDNA binding protein CDS	3015
59301	59301	1	SNP (transition)	T -> C	TTG -> TCG	L -> S	Substitution	DNA packaging protein CDS	125
62709	62709	1	SNP (transition)	A -> G	TCA -> TCG		None	envelope glycoprotein B CDS	1344
64667	64667	1	SNP (transversion)	G -> T	CAG -> CAT	Q -> H	Substitution	unknown CDS	156
64708	64708	1	SNP (transition)	G -> A	GGT -> GAT	G -> D	Substitution	unknown CDS	197
64814	64814	1	SNP (transversion)	C -> A	GCC -> GCA		None	unknown CDS	303
67161	67161	1	SNP (transversion)	C -> A	TTG -> TTT	L -> F	Substitution	unknown CDS	1749
67696	67696	1	SNP (transition)	C -> T	AGA -> AAA	R -> K	Substitution	unknown CDS	1214
68771	68771	1	SNP (transversion)	G -> T	CGC -> AGC	R -> S	Substitution	unknown CDS	139
70274	70274	1	SNP (transversion)	G -> T	TCG -> TCT		None	thymidine kinase CDS	432
72443	72443	1	SNP (transition)	T -> C	TTA -> TCA	L -> S	Substitution	envelope glycoprotein H CDS	1319
73858	73858	1	Deletion	G
73885	73890	6	Deletion (tandem repeat)	(GCG)4 -> (GCG)2
73917	73922	6	Deletion (tandem repeat)	(GCG)4 -> (GCG)2
73954	73954	1	Deletion	G
73981	73986	6	Deletion (tandem repeat)	(GCG)4 -> (GCG)2
74013	74018	6	Deletion (tandem repeat)	(GCG)4 -> (GCG)2
74045	74050	6	Deletion (tandem repeat)	(GCG)4 -> (GCG)2
74815	74815	1	SNP (transition)	A -> G	GTA -> GCA	V -> A	Substitution	tegument protein CDS	1343
74829	74829	1	SNP (transition)	A -> G	AGT -> AGC		None	tegument protein CDS	1329
74941	74941	1	SNP (transition)	T -> C	TAT -> TGT	Y -> C	Substitution	tegument protein CDS	1217
75571	75571	1	SNP (transition)	T -> C	CAT -> CGT	H -> R	Substitution	tegument protein CDS	587
75660	75660	1	SNP (transition)	A -> G	ACT -> ACC		None	tegument protein CDS	498
76703	76703	1	SNP (transition)	T -> C
77127	77127	1	SNP (transversion)	T -> G	CTT -> CTG		None	integral membrane protein CDS	402
78892	78892	1	SNP (transition)	A -> G	GCA -> GCG		None	major capsid protein CDS	1257
81459	81459	1	SNP (transition)	G -> A	AGG -> AAG	R -> K	Substitution	major capsid protein CDS	3824
84465	84465	1	SNP (transition)	G -> A	AGT -> AAT	S -> N	Substitution	putative product ORF45 CDS	53
84803	84803	1	SNP (transition)	C -> T	CTG -> TTG		None	putative product ORF45 CDS	391
85276	85276	1	SNP (transition)	T -> C	GGT -> GGC		None	putative product ORF45 CDS	864
86903	86903	1	SNP (transversion)	G -> C	GTG -> GTC		None	tegument protein CDS	351
90811	90811	1	SNP (transition)	C -> T	CTG -> TTG		None	tegument protein CDS	1510
92166	92166	1	SNP (transition)	T -> C	TCG -> CCG	S -> P	Substitution	deoxyribonuclease CDS	1099
95394	95394	1	SNP (transition)	G -> A	GAC -> AAC	D -> N	Substitution	origin binding protein CDS	1072
103442	103442	1	SNP (transversion)	A -> C	ACA -> ACC		None	component of DNA helicase-primase complex CDS	1137
104012	104012	1	SNP (transition)	G -> A	GGG -> GGA		None	component of DNA helicase-primase complex CDS	1707
104716	104716	1	SNP (transition)	G -> A	AGG -> AAG	R -> K	Substitution	component of DNA helicase-primase complex CDS	2411
106751	106751	1	SNP (transition)	G -> A	CGC -> CGT		None	unknown CDS	297
107935	107935	1	SNP (transition)	T -> C	GAA -> GAG		None	uracil-DNA glycosylase CDS	141
108682	108682	1	SNP (transition)	T -> C	CAA -> CGA	Q -> R	Substitution	envelope glycoprotein H CDS	53
108745	108745	1	SNP (transversion)	G -> T
109144	109144	1	SNP (transition)	A -> G
109256	109256	1	SNP (transition)	G -> A
109319	109319	1	SNP (transition)	A -> G
109423	109423	1	SNP (transition)	G -> A
109747	109747	1	SNP (transition)	G -> A
109757	109757	1	SNP (transition)	A -> G
110244	110244	1	SNP (transversion)	T -> A
110472	110472	1	SNP (transition)	A -> G	TTG -> CTG		None	transcriptional regulator CDS	1480
111238	111238	1	SNP (transition)	C -> T	ACG -> ACA		None	transcriptional regulator CDS	714
112344	112403	60	Deletion	CCCTAGCCCCCTGCCCTAGCCCCCTGCCCTAGCCCCCTGCCCTAGCCCCCTGCCCTAGCC
112484	112483	0	Insertion (tandem repeat)	(CC)4 -> (CC)5
112794	112794	1	SNP (transversion)	A -> C
112892	112892	1	SNP (transversion)	A -> C
112937	112936	0	Insertion (tandem repeat)	(G)9 -> (G)10
112946	112946	1	SNP (transition)	C -> T
113051	113053	3	Substitution	AGG -> TTC
113143	113488	346	Deletion	-AGGAAGGGGAGGAGCAGGAAGGGGAGGAGCAGGAAGGGGAGGAGCAGGAAGGGGAGGAGCAGGAAGGGGAGGAGCAGGAAGGGGAGGAGCAGGAAGGGGAGGAGCAGGAAGGGGAGGAGCAGGAAGGGGAGGAGCAGGAAGGGGAGGAGCAGGAAGGGGAGGAGCAGGAAGGGGAGGAGCAGGAAGGGGAGGAGCAGGAAGGGGAGGAGCAGGAACCATCAACCCGCCCATCAACCCGCCCATCAACCCGCCCATCAACCCGCCCATCAACCCGCCCATCAACCCGCCCATCAACCCGCCCATCAACCCGCCCATCAACCCGCCCATCAACCCGCCCATCAACCCG
114851	114851	1	SNP (transversion)	T -> G	AAC -> CAC	N -> H	Substitution	transcriptional regulator CDS	3448
114948	114948	1	SNP (transversion)	T -> G	CGA -> CGC		None	transcriptional regulator CDS	3351
116357	116357	1	SNP (transversion)	A -> T	TCC -> ACC	S -> T	Substitution	transcriptional regulator CDS	1942
117476	117476	1	SNP (transversion)	C -> A	GCT -> TCT	A -> S	Substitution	transcriptional regulator CDS	823
118065	118065	1	SNP (transition)	T -> C	GGA -> GGG		None	transcriptional regulator CDS	234
118233	118233	1	SNP (transversion)	T -> G	GGA -> GGC		None	transcriptional regulator CDS	66
118421	118421	1	SNP (transition)	G -> A
118738	118738	1	SNP (transition)	T -> C
119105	119104	0	Insertion (tandem repeat)	(C)7 -> (C)8
119959	119959	1	SNP (transition)	G -> A
120264	120288	25	Deletion	GTGGGGGGGGCAAAAATTTTTGAGC
120330	120333	4	Deletion (tandem repeat)	(GG)6 -> (GG)4
120437	120436	0	Insertion (tandem repeat)	(G)5 -> (G)6
120989	120989	1	SNP (transition)	G -> A
120990	120990	1	SNP (transversion)	G -> C
120991	120991	1	SNP (transversion)	C -> G
120995	120995	1	SNP (transversion)	C -> A
120996	121081	86	Deletion	CCGGCCCAGCCCAGCTCCGGCGACCCCGGCCCAGCCCAGCTCCGGCGACCCCGGCCCAGCCCAGCTCCGGCGACCCCGGCCCAGCC
121082	121155	74	Deletion	ATGCCCCACGGACAGCCGTGCGGGGCGTGCGACGGATCCTGCCGCATGGCCCAGCGGGGGACGCCGTCCACCAG	ATG,CCC,CAC,GGA,CAG,CCG,TGC,GGG,GCG,TGC,GAC,GGA,TCC,TGC,CGC,ATG,GCC,CAG,CGG,GGG,ACG,CCG,TCC,ACC,AGC ->	MPHGQPCGACDGSCRMAQRGTPSTS ->	Start Codon Loss	putative host range determinant protein CDS	1
121156	121156	1	SNP (transversion)	C -> G	AGC -> AGG	S -> R	Substitution	putative host range determinant protein CDS	75
121366	121366	1	SNP (transversion)	G -> T	GTG -> GTT		None	putative host range determinant protein CDS	285
122060	122060	1	SNP (transition)	C -> T
122347	122347	1	SNP (transition)	C -> T
122418	122427	10	Deletion	AGGGTGGGGT
122429	122429	1	SNP (transversion)	G -> T
123452	123453	2	Deletion (tandem repeat)	(GG)5 -> (GG)4
123548	123548	1	SNP (transition)	G -> A
123890	123890	1	SNP (transition)	A -> G	TTT -> TCT	F -> S	Substitution	IR6 CDS	782
123913	123913	1	SNP (transition)	C -> T	CAG -> CAA		None	IR6 CDS	759
124708	124707	0	Insertion	+C			Frame Shift	ORF68 CDS	1044
124751	124751	1	SNP (transition)	T -> C	ACC -> GCC	T -> A	Substitution	ORF68 CDS	1000
124997	124997	1	SNP (transition)	A -> G	TGG -> CGG	W -> R	Substitution	truncated virion membrane protein CDS	754
124997	124997	1	SNP (transition)	A -> G	TGG -> CGG	W -> R	Substitution	ORF68 CDS	754
125038	125038	1	SNP (transversion)	G -> T	CCG -> CAG	P -> Q	Substitution	truncated virion membrane protein CDS	713
125038	125038	1	SNP (transversion)	G -> T	CCG -> CAG	P -> Q	Substitution	ORF68 CDS	713
125041	125041	1	SNP (transversion)	A -> C	CTG -> CGG	L -> R	Substitution	truncated virion membrane protein CDS	710
125041	125041	1	SNP (transversion)	A -> C	CTG -> CGG	L -> R	Substitution	ORF68 CDS	710
125415	125415	1	SNP (transition)	A -> G	CTT -> CTC		None	truncated virion membrane protein CDS	336
125415	125415	1	SNP (transition)	A -> G	CTT -> CTC		None	ORF68 CDS	336
127176	127176	1	SNP (transition)	C -> T	GCC -> GCT		None	envelope glycoprotein G CDS	21
129144	129144	1	SNP (transition)	G -> A	ACG -> ACA		None	envelope glycoprotein CDS	573
129159	129159	1	SNP (transition)	G -> A	ACG -> ACA		None	envelope glycoprotein CDS	588
129174	129174	1	SNP (transition)	G -> A	ACG -> ACA		None	envelope glycoprotein CDS	603
129189	129189	1	SNP (transition)	G -> A	ACG -> ACA		None	envelope glycoprotein CDS	618
129325	129327	2	Substitution	ACC -> GCA	ACC -> GCA	T -> A	Substitution	envelope glycoprotein CDS	754
129342	129342	1	SNP (transition)	C -> T	ACC -> ACT		None	envelope glycoprotein CDS	771
129345	129345	1	SNP (transition)	C -> T	ACC -> ACT		None	envelope glycoprotein CDS	774
129346	129346	1	SNP (transversion)	A -> T	ACT -> TCT	T -> S	Substitution	envelope glycoprotein CDS	775
129348	129348	1	SNP (transition)	T -> C	ACT -> ACC		None	envelope glycoprotein CDS	777
129349	129351	2	Substitution	GCG -> TCT	GCG -> TCT	A -> S	Substitution	envelope glycoprotein CDS	778
129354	129354	1	SNP (transversion)	T -> A	GCT -> GCA		None	envelope glycoprotein CDS	783
129372	129372	1	SNP (transition)	C -> T	ACC -> ACT		None	envelope glycoprotein CDS	801
129381	129381	1	SNP (transversion)	G -> T	GCG -> GCT		None	envelope glycoprotein CDS	810
132945	132945	1	SNP (transition)	T -> C	GTC -> GCC	V -> A	Substitution	envelope glycoprotein I CDS	365
137276	137276	1	SNP (transversion)	T -> G
137279	137279	1	SNP (transversion)	C -> A
137320	137320	1	SNP (transition)	T -> C
137566	137566	1	SNP (transition)	A -> G
137610	137609	0	Insertion	G
138404	138404	1	SNP (transition)	G -> A	CAG -> CAA		None	IR6 CDS	759
138427	138427	1	SNP (transition)	T -> C	TTT -> TCT	F -> S	Substitution	IR6 CDS	782
138688	138688	1	SNP (transition)	C -> T
138692	138695	4	Substitution	TACC -> CTTT
138697	138697	1	SNP (transition)	C -> T
138699	138699	1	SNP (transition)	C -> T
138701	>138703	>3	Insertion	CCC -> TTTG
138704	138703	0	Insertion	A
138704	138703	0	Insertion (tandem repeat)	(C)5 -> (C)6
138704	138703	0	Insertion	CA
138704	138703	0	Insertion (tandem repeat)	(C)5 -> (C)6
138704	138703	0	Insertion	G
138704	138703	0	Insertion	TA
138705	138706	2	Substitution	CG -> TA
138712	138712	1	SNP (transition)	C -> T
138714	138714	1	SNP (transition)	T -> C
138716	138716	1	SNP (transversion)	C -> A
138718	138719	2	Substitution	CT -> TC
138721	138726	6	Deletion	CCGCTC
138731	138731	1	SNP (transversion)	C -> A
138732	138732	1	SNP (transversion)	C -> G
138735	138735	1	SNP (transversion)	T -> G
138736	138736	1	SNP (transversion)	C -> G
138737	138737	1	SNP (transversion)	G -> C
138739	138739	1	SNP (transition)	C -> T
138740	138740	1	SNP (transition)	C -> T
138769	138769	1	SNP (transition)	C -> T
138856	138857	2	Deletion (tandem repeat)	(CC)5 -> (CC)4
139878	139885	8	Deletion	CCTCCCCC
139970	139970	1	SNP (transition)	G -> A
140257	140257	1	SNP (transition)	G -> A
140951	140951	1	SNP (transversion)	C -> A	GTG -> GTT		None	putative host range determinant protein CDS	285
141155	141235	81	Deletion	GAGGGGGCTGGTGGACGGCGTCCCCCGCTGGGCCATGCGGCAGGATCCGTCGCACGCCCCGCACGGCTGTCCGTGGGGCAT	ATG,CCC,CAC,GGA,CAG,CCG,TGC,GGG,GCG,TGC,GAC,GGA,TCC,TGC,CGC,ATG,GCC,CAG,CGG,GGG,ACG,CCG,TCC,ACC,AGC,CCC,CTC ->	MPHGQPCGACDGSCRMAQRGTPSTSPL ->	Start Codon Loss	putative host range determinant protein CDS	1
141236	141325	90	Deletion	GGCTGGGCCGGGGTCGCCGGAGCTGGGCTGGGCCGGGGTCGCCGGAGCTGGGCTGGGCCGGGGTCGCCGGAGCTGGGCTGGGCCGGGGTC
141877	141876	0	Insertion (tandem repeat)	(C)5 -> (C)6
141961	142054	94	Deletion	GTAACCGTATTTTAGCGCCCCCCCCCCCCCATAGCCGCATACCGTAACCCAGCCATGCTATCTGTTGCGCTCAAAAATTTTTGCCCCCCCCACC
142358	142358	1	SNP (transition)	C -> T
142369	142376	8	Deletion	GGGGGTGT
143206	143205	0	Insertion (tandem repeat)	(G)7 -> (G)8
143579	143579	1	SNP (transition)	A -> G
143896	143896	1	SNP (transition)	C -> T
144084	144084	1	SNP (transversion)	A -> C	GGA -> GGC		None	transcriptional regulator CDS	66
144252	144252	1	SNP (transition)	A -> G	GGA -> GGG		None	transcriptional regulator CDS	234
144841	144841	1	SNP (transversion)	G -> T	GCT -> TCT	A -> S	Substitution	transcriptional regulator CDS	823
145960	145960	1	SNP (transversion)	T -> A	TCC -> ACC	S -> T	Substitution	transcriptional regulator CDS	1942
147369	147369	1	SNP (transversion)	A -> C	CGA -> CGC		None	transcriptional regulator CDS	3351
147466	147466	1	SNP (transversion)	A -> C	AAC -> CAC	N -> H	Substitution	transcriptional regulator CDS	3448
148811	149074	264	Deletion	ACTGGGCGGGTTGATGGGCGGGTTGATGGGCGGGTTGATGGGCGGGTTGATGGGCGGGTTGATGGGCGGGTTGATGGGCGGGTTGATGGGCGGGTTGATGGGCGGGTTGATGGGCGGGTTGATGGGCGGGTTGATGGGCGGGTTGATGGTTCCTGCTCCTCCCCTTCCTGCTCCTCCCCTTCCTGCTCCTCCCCTTCCTGCTCCTCCCCTTCCTGCTCCTCCCCTTCCTGCTCCTCCCCTTCCTGCTCCTCCCCTTCCTGCTCC
149126	149175	50	Deletion	TCCTGCTCCTCCCCTTCCTGCTCCTCCCCTTCCTGCTCCTCCCCTTCCTG
149264	149266	3	Substitution	CCT -> GAA
149367	149409	43	Deletion	TTTGGCCCCCCCCCTTAGACCACGCCCCCCTATTCAAATGCGG -> C
149412	149413	2	Substitution	GT -> AA
149415	149415	1	SNP (transition)	A -> G
149417	149417	1	SNP (transversion)	A -> C
149417	149417	1	SNP (transition)	A -> G
149419	149419	1	SNP (transversion)	G -> C
149420	149420	1	SNP (transition)	C -> T
149421	149421	1	SNP (transversion)	G -> C
149422	149422	1	SNP (transversion)	G -> C
149423	149423	1	SNP (transversion)	G -> C

## Sheet: ST6-LS110097
Minimum	Maximum	Length	Polymorphism Type	Change	Codon Change	Amino Acid Change	Protein Effect	CDS	CDS Position
127	143	17	Deletion (tandem repeat)	(AGGCCACGCCCACTGGG)12 -> (AGGCCACGCCCACTGGG)11
225	224	0	Insertion (tandem repeat)	(AGGCCACGCCCACTGGG)12 -> (AGGCCACGCCCACTGGG)13
580	615	36	Deletion (tandem repeat)	(TGGGGCTCACTGCTATGC)19 -> (TGGGGCTCACTGCTATGC)17
633	632	0	Insertion (tandem repeat)	(TGGGGCTCACTGCTATGC)19 -> (TGGGGCTCACTGCTATGC)21
876	876	1	SNP (transition)	C -> T
5517	5517	1	SNP (transversion)	A -> C	GTC -> GGC	V -> G	Substitution	unknown CDS	341
5585	5585	1	SNP (transition)	C -> T	GCG -> GCA		None	unknown CDS	273
5893	5892	0	Insertion (tandem repeat)	(TG)2 -> (TG)3
5898	5898	1	SNP (transition)	C -> T
6142	6142	1	SNP (transition)	C -> T	AAG -> AAA		None	glycoprotein K CDS	882
6330	6330	1	SNP (transition)	A -> G	TTG -> CTG		None	glycoprotein K CDS	694
6805	6805	1	SNP (transition)	G -> A	AGC -> AGT		None	glycoprotein K CDS	219
7437	7437	1	SNP (transition)	G -> A	TCT -> TTT	S -> F	Substitution	primase CDS	2846
10620	10620	1	SNP (transition)	A -> G	AAC -> GAC	N -> D	Substitution	unknown CDS	340
11158	11158	1	SNP (transition)	G -> A	TCC -> TCT		None	deoxyuridine triphosphatase CDS	939
11761	11761	1	SNP (transversion)	G -> T	CGC -> CGA		None	deoxyuridine triphosphatase CDS	336
13094	13094	1	SNP (transversion)	A -> C	AAG -> CAG	K -> Q	Substitution	tegument protein CDS	565
13277	13277	1	SNP (transversion)	G -> T	GCT -> TCT	A -> S	Substitution	tegument protein CDS	748
15178	15178	1	SNP (transversion)	C -> G
15383	15383	1	SNP (transversion)	C -> A	CGC -> CGA		None	tegument protein CDS	84
16213	16213	1	SNP (transition)	T -> C	TTA -> TCA	L -> S	Substitution	tegument protein CDS	914
16512	16512	1	SNP (transition)	G -> A	GCA -> ACA	A -> T	Substitution	tegument protein CDS	1213
16677	16677	1	SNP (transition)	A -> G	ACC -> GCC	T -> A	Substitution	tegument protein CDS	1378
17110	17110	1	SNP (transversion)	C -> G	GCT -> GGT	A -> G	Substitution	tegument protein CDS	1811
17209	17209	1	SNP (transition)	C -> T	GCA -> GTA	A -> V	Substitution	tegument protein CDS	1910
17646	17646	1	SNP (transition)	C -> T	CTA -> TTA		None	tegument protein CDS	2347
19746	19746	1	SNP (transition)	A -> G	AAT -> GAT	N -> D	Substitution	tegument protein CDS	1681
21491	21491	1	SNP (transition)	A -> G	GTT -> GTC		None	glycoprotein C CDS	1353
22271	22271	1	SNP (transition)	C -> T	ACG -> ACA		None	glycoprotein C CDS	573
23249	23249	1	SNP (transition)	A -> G	ATT -> ATC		None	putative integral membrane protein CDS	978
27258	27259	2	Substitution	GG -> AA	TCG,GAT -> TCA,AAT	SD -> SN	Substitution	tegument protein CDS	1005
28116	28116	1	SNP (transition)	A -> G	TTG -> CTG		None	small subunit of ribonucleotide reductase CDS	736
29981	29981	1	SNP (transition)	C -> T	GGT -> AGT	G -> S	Substitution	large subunit of ribonucleotide reductase CDS	1288
31502	31501	0	Insertion	G
31620	31620	1	SNP (transition)	G -> A	CCC -> TCC	P -> S	Substitution	capsid protein CDS	1288
31692	31692	1	SNP (transition)	A -> G	TTG -> CTG		None	capsid protein CDS	1216
32059	32059	1	SNP (transition)	G -> A	AGC -> AGT		None	capsid protein CDS	849
39071	39071	1	SNP (transition)	T -> C	ATT -> ATC		None	very large tegument protein CDS	2493
44334	44334	1	SNP (transition)	A -> G	AGC -> GGC	S -> G	Substitution	very large tegument protein CDS	7756
44872	44873	2	Substitution	CC -> GG	GCC -> GGG	A -> G	Substitution	very large tegument protein CDS	8294
44874	44875	2	Substitution	CC -> GT	CCC -> GTC	P -> V	Substitution	very large tegument protein CDS	8296
44877	44879	2	Substitution	GCC -> TCT	GCC -> TCT	A -> S	Substitution	very large tegument protein CDS	8299
44880	44880	1	SNP (transition)	G -> A	GCG -> ACG	A -> T	Substitution	very large tegument protein CDS	8302
44885	44886	2	Substitution	CC -> TT	GCC,CCG -> GCT,TCG	AP -> AS	Substitution	very large tegument protein CDS	8307
44887	44887	1	SNP (transition)	C -> T	CCG -> CTG	P -> L	Substitution	very large tegument protein CDS	8309
44887	44888	2	Substitution	CG -> GC	CCG -> CGC	P -> R	Substitution	very large tegument protein CDS	8309
44892	44897	5	Substitution	AAATCT -> GGGGCC	AAA,TCT -> GGG,GCC	KS -> GA	Substitution	very large tegument protein CDS	8314
44905	44906	2	Substitution	CC -> AA	GCC -> GAA	A -> E	Substitution	very large tegument protein CDS	8327
44907	44908	2	Substitution	CC -> GA	CCC -> GAC	P -> D	Substitution	very large tegument protein CDS	8329
44910	44912	3	Substitution	GCC -> CAA	GCC -> CAA	A -> Q	Substitution	very large tegument protein CDS	8332
44913	44913	1	SNP (transition)	G -> A	GCG -> ACG	A -> T	Substitution	very large tegument protein CDS	8335
44915	44921	6	Substitution	GGCCCCG -> AAAATCA	GCG,GCC,CCG -> GCA,AAA,TCA	AAP -> AKS	Substitution	very large tegument protein CDS	8337
44927	44952	25	Deletion	ATCTGCGGCGGCCCCCGCCGCGGCCC -> CGG			Frame Shift	very large tegument protein CDS	8349
44956	44958	3	Substitution	CCA -> GGG	GCC,AAA -> GGG,GAA	AK -> GE	Substitution	very large tegument protein CDS	8378
44974	44975	2	Substitution	CC -> TG	CCC -> CTG	P -> L	Substitution	very large tegument protein CDS	8396
45047	45047	1	SNP (transition)	T -> C	GCT -> GCC		None	very large tegument protein CDS	8469
45048	45050	3	Substitution	GAA -> CCC	GAA -> CCC	E -> P	Substitution	very large tegument protein CDS	8470
45052	45052	1	SNP (transition)	T -> C	GTC -> GCC	V -> A	Substitution	very large tegument protein CDS	8474
45054	45056	2	Substitution	CCA -> GCG	CCA -> GCG	P -> A	Substitution	very large tegument protein CDS	8476
45057	45059	3	Substitution	AAG -> GCC	AAG -> GCC	K -> A	Substitution	very large tegument protein CDS	8479
45068	45068	1	SNP (transition)	G -> A	AAG -> AAA		None	very large tegument protein CDS	8490
45074	45077	3	Substitution	GGCC -> AACA	CAG,GCC -> CAA,ACA	QA -> QT	Substitution	very large tegument protein CDS	8496
45080	45080	1	SNP (transition)	G -> A	AAG -> AAA		None	very large tegument protein CDS	8502
45081	45082	2	Substitution	GA -> TC	GAC -> TCC	D -> S	Substitution	very large tegument protein CDS	8503
45083	45083	1	SNP (transversion)	C -> A	GAC -> GAA	D -> E	Substitution	very large tegument protein CDS	8505
45084	45084	1	SNP (transversion)	C -> G	CAG -> GAG	Q -> E	Substitution	very large tegument protein CDS	8506
45084	45085	2	Substitution	CA -> AC	CAG -> ACG	Q -> T	Substitution	very large tegument protein CDS	8506
45086	45086	1	SNP (transversion)	G -> T	CAG -> CAT	Q -> H	Substitution	very large tegument protein CDS	8508
45089	45089	1	SNP (transition)	C -> T	GCC -> GCT		None	very large tegument protein CDS	8511
45090	45092	2	Substitution	AAG -> GAA	AAG -> GAA	K -> E	Substitution	very large tegument protein CDS	8512
45094	45094	1	SNP (transversion)	A -> T	GAC -> GTC	D -> V	Substitution	very large tegument protein CDS	8516
45101	45101	1	SNP (transversion)	C -> A	GCC -> GCA		None	very large tegument protein CDS	8523
45105	45107	3	Deletion	GAC	GAC ->	D ->	Deletion	very large tegument protein CDS	8527
45109	45109	1	SNP (transversion)	A -> C	CAG -> CCG	Q -> P	Substitution	very large tegument protein CDS	8531
45255	45255	1	SNP (transition)	T -> C	TTG -> CTG		None	very large tegument protein CDS	8677
47847	47847	1	SNP (transversion)	T -> A	TCA -> TCT		None	membrane associated phosphoprotein CDS	318
49041	49041	1	SNP (transition)	T -> C	CTT -> CTC		None	DNA packaging protein CDS	345
49989	49989	1	SNP (transition)	C -> T	GCC -> GCT		None	DNA packaging protein CDS	1293
50586	50586	1	SNP (transversion)	A -> C	AAG -> ACG	K -> T	Substitution	unknown CDS	35
52151	52151	1	SNP (transition)	T -> C	AAG -> GAG	K -> E	Substitution	DNA polymerase CDS	2968
53135	53135	1	SNP (transversion)	T -> G	AGT -> CGT	S -> R	Substitution	DNA polymerase CDS	1984
54195	54195	1	SNP (transition)	A -> G	TTT -> TTC		None	DNA polymerase CDS	924
55378	55378	1	SNP (transition)	A -> G
55655	55655	1	SNP (transition)	G -> A	AGC -> AAC	S -> N	Substitution	ssDNA binding protein CDS	269
58401	58401	1	SNP (transversion)	C -> A	CGC -> CGA		None	ssDNA binding protein CDS	3015
59301	59301	1	SNP (transition)	T -> C	TTG -> TCG	L -> S	Substitution	DNA packaging protein CDS	125
62709	62709	1	SNP (transition)	A -> G	TCA -> TCG		None	envelope glycoprotein B CDS	1344
64667	64667	1	SNP (transversion)	G -> T	CAG -> CAT	Q -> H	Substitution	unknown CDS	156
64708	64708	1	SNP (transition)	G -> A	GGT -> GAT	G -> D	Substitution	unknown CDS	197
64814	64814	1	SNP (transversion)	C -> A	GCC -> GCA		None	unknown CDS	303
67161	67161	1	SNP (transversion)	C -> A	TTG -> TTT	L -> F	Substitution	unknown CDS	1749
67696	67696	1	SNP (transition)	C -> T	AGA -> AAA	R -> K	Substitution	unknown CDS	1214
68771	68771	1	SNP (transversion)	G -> T	CGC -> AGC	R -> S	Substitution	unknown CDS	139
70274	70274	1	SNP (transversion)	G -> T	TCG -> TCT		None	thymidine kinase CDS	432
72443	72443	1	SNP (transition)	T -> C	TTA -> TCA	L -> S	Substitution	envelope glycoprotein H CDS	1319
73858	73858	1	Deletion	G
73885	73890	6	Deletion (tandem repeat)	(GCG)4 -> (GCG)2
73917	73922	6	Deletion (tandem repeat)	(GCG)4 -> (GCG)2
73954	73954	1	Deletion	G
73981	73986	6	Deletion (tandem repeat)	(GCG)4 -> (GCG)2
74013	74018	6	Deletion (tandem repeat)	(GCG)4 -> (GCG)2
74045	74050	6	Deletion (tandem repeat)	(GCG)4 -> (GCG)2
74815	74815	1	SNP (transition)	A -> G	GTA -> GCA	V -> A	Substitution	tegument protein CDS	1343
74829	74829	1	SNP (transition)	A -> G	AGT -> AGC		None	tegument protein CDS	1329
74941	74941	1	SNP (transition)	T -> C	TAT -> TGT	Y -> C	Substitution	tegument protein CDS	1217
75571	75571	1	SNP (transition)	T -> C	CAT -> CGT	H -> R	Substitution	tegument protein CDS	587
75660	75660	1	SNP (transition)	A -> G	ACT -> ACC		None	tegument protein CDS	498
76703	76703	1	SNP (transition)	T -> C
77127	77127	1	SNP (transversion)	T -> G	CTT -> CTG		None	integral membrane protein CDS	402
78892	78892	1	SNP (transition)	A -> G	GCA -> GCG		None	major capsid protein CDS	1257
81459	81459	1	SNP (transition)	G -> A	AGG -> AAG	R -> K	Substitution	major capsid protein CDS	3824
84465	84465	1	SNP (transition)	G -> A	AGT -> AAT	S -> N	Substitution	putative product ORF45 CDS	53
84803	84803	1	SNP (transition)	C -> T	CTG -> TTG		None	putative product ORF45 CDS	391
85276	85276	1	SNP (transition)	T -> C	GGT -> GGC		None	putative product ORF45 CDS	864
86903	86903	1	SNP (transversion)	G -> C	GTG -> GTC		None	tegument protein CDS	351
90811	90811	1	SNP (transition)	C -> T	CTG -> TTG		None	tegument protein CDS	1510
92166	92166	1	SNP (transition)	T -> C	TCG -> CCG	S -> P	Substitution	deoxyribonuclease CDS	1099
95394	95394	1	SNP (transition)	G -> A	GAC -> AAC	D -> N	Substitution	origin binding protein CDS	1072
103442	103442	1	SNP (transversion)	A -> C	ACA -> ACC		None	component of DNA helicase-primase complex CDS	1137
104012	104012	1	SNP (transition)	G -> A	GGG -> GGA		None	component of DNA helicase-primase complex CDS	1707
104716	104716	1	SNP (transition)	G -> A	AGG -> AAG	R -> K	Substitution	component of DNA helicase-primase complex CDS	2411
106751	106751	1	SNP (transition)	G -> A	CGC -> CGT		None	unknown CDS	297
107935	107935	1	SNP (transition)	T -> C	GAA -> GAG		None	uracil-DNA glycosylase CDS	141
108682	108682	1	SNP (transition)	T -> C	CAA -> CGA	Q -> R	Substitution	envelope glycoprotein H CDS	53
108745	108745	1	SNP (transversion)	G -> T
109144	109144	1	SNP (transition)	A -> G
109256	109256	1	SNP (transition)	G -> A
109319	109319	1	SNP (transition)	A -> G
109423	109423	1	SNP (transition)	G -> A
109747	109747	1	SNP (transition)	G -> A
109757	109757	1	SNP (transition)	A -> G
110244	110244	1	SNP (transversion)	T -> A
110472	110472	1	SNP (transition)	A -> G	TTG -> CTG		None	transcriptional regulator CDS	1480
111238	111238	1	SNP (transition)	C -> T	ACG -> ACA		None	transcriptional regulator CDS	714
112344	112403	60	Deletion	CCCTAGCCCCCTGCCCTAGCCCCCTGCCCTAGCCCCCTGCCCTAGCCCCCTGCCCTAGCC
112484	112483	0	Insertion (tandem repeat)	(CC)4 -> (CC)5
112794	112794	1	SNP (transversion)	A -> C
112892	112892	1	SNP (transversion)	A -> C
112937	112936	0	Insertion (tandem repeat)	(G)9 -> (G)10
112946	112946	1	SNP (transition)	C -> T
113051	113053	3	Substitution	AGG -> TTC
113143	113488	346	Deletion	-AGGAAGGGGAGGAGCAGGAAGGGGAGGAGCAGGAAGGGGAGGAGCAGGAAGGGGAGGAGCAGGAAGGGGAGGAGCAGGAAGGGGAGGAGCAGGAAGGGGAGGAGCAGGAAGGGGAGGAGCAGGAAGGGGAGGAGCAGGAAGGGGAGGAGCAGGAAGGGGAGGAGCAGGAAGGGGAGGAGCAGGAAGGGGAGGAGCAGGAAGGGGAGGAGCAGGAACCATCAACCCGCCCATCAACCCGCCCATCAACCCGCCCATCAACCCGCCCATCAACCCGCCCATCAACCCGCCCATCAACCCGCCCATCAACCCGCCCATCAACCCGCCCATCAACCCGCCCATCAACCCG
114851	114851	1	SNP (transversion)	T -> G	AAC -> CAC	N -> H	Substitution	transcriptional regulator CDS	3448
114948	114948	1	SNP (transversion)	T -> G	CGA -> CGC		None	transcriptional regulator CDS	3351
116357	116357	1	SNP (transversion)	A -> T	TCC -> ACC	S -> T	Substitution	transcriptional regulator CDS	1942
117476	117476	1	SNP (transversion)	C -> A	GCT -> TCT	A -> S	Substitution	transcriptional regulator CDS	823
118065	118065	1	SNP (transition)	T -> C	GGA -> GGG		None	transcriptional regulator CDS	234
118233	118233	1	SNP (transversion)	T -> G	GGA -> GGC		None	transcriptional regulator CDS	66
118421	118421	1	SNP (transition)	G -> A
118738	118738	1	SNP (transition)	T -> C
119105	119104	0	Insertion (tandem repeat)	(C)7 -> (C)8
119959	119959	1	SNP (transition)	G -> A
120264	120288	25	Deletion	GTGGGGGGGGCAAAAATTTTTGAGC
120330	120333	4	Deletion (tandem repeat)	(GG)6 -> (GG)4
120437	120436	0	Insertion (tandem repeat)	(G)5 -> (G)6
120989	120989	1	SNP (transition)	G -> A
120990	120990	1	SNP (transversion)	G -> C
120991	120991	1	SNP (transversion)	C -> G
120995	120995	1	SNP (transversion)	C -> A
120996	121081	86	Deletion	CCGGCCCAGCCCAGCTCCGGCGACCCCGGCCCAGCCCAGCTCCGGCGACCCCGGCCCAGCCCAGCTCCGGCGACCCCGGCCCAGCC
121082	121155	74	Deletion	ATGCCCCACGGACAGCCGTGCGGGGCGTGCGACGGATCCTGCCGCATGGCCCAGCGGGGGACGCCGTCCACCAG	ATG,CCC,CAC,GGA,CAG,CCG,TGC,GGG,GCG,TGC,GAC,GGA,TCC,TGC,CGC,ATG,GCC,CAG,CGG,GGG,ACG,CCG,TCC,ACC,AGC ->	MPHGQPCGACDGSCRMAQRGTPSTS ->	Start Codon Loss	putative host range determinant protein CDS	1
121156	121156	1	SNP (transversion)	C -> G	AGC -> AGG	S -> R	Substitution	putative host range determinant protein CDS	75
121366	121366	1	SNP (transversion)	G -> T	GTG -> GTT		None	putative host range determinant protein CDS	285
122060	122060	1	SNP (transition)	C -> T
122347	122347	1	SNP (transition)	C -> T
122418	122427	10	Deletion	AGGGTGGGGT
122429	122429	1	SNP (transversion)	G -> T
123452	123453	2	Deletion (tandem repeat)	(GG)5 -> (GG)4
123548	123548	1	SNP (transition)	G -> A
123890	123890	1	SNP (transition)	A -> G	TTT -> TCT	F -> S	Substitution	IR6 CDS	782
123913	123913	1	SNP (transition)	C -> T	CAG -> CAA		None	IR6 CDS	759
124708	124707	0	Insertion	+C			Frame Shift	ORF68 CDS	1044
124751	124751	1	SNP (transition)	T -> C	ACC -> GCC	T -> A	Substitution	ORF68 CDS	1000
124997	124997	1	SNP (transition)	A -> G	TGG -> CGG	W -> R	Substitution	ORF68 CDS	754
124997	124997	1	SNP (transition)	A -> G	TGG -> CGG	W -> R	Substitution	truncated virion membrane protein CDS	754
125038	125038	1	SNP (transversion)	G -> T	CCG -> CAG	P -> Q	Substitution	ORF68 CDS	713
125038	125038	1	SNP (transversion)	G -> T	CCG -> CAG	P -> Q	Substitution	truncated virion membrane protein CDS	713
125041	125041	1	SNP (transversion)	A -> C	CTG -> CGG	L -> R	Substitution	ORF68 CDS	710
125041	125041	1	SNP (transversion)	A -> C	CTG -> CGG	L -> R	Substitution	truncated virion membrane protein CDS	710
125415	125415	1	SNP (transition)	A -> G	CTT -> CTC		None	ORF68 CDS	336
125415	125415	1	SNP (transition)	A -> G	CTT -> CTC		None	truncated virion membrane protein CDS	336
127176	127176	1	SNP (transition)	C -> T	GCC -> GCT		None	envelope glycoprotein G CDS	21
129144	129144	1	SNP (transition)	G -> A	ACG -> ACA		None	envelope glycoprotein CDS	573
129159	129159	1	SNP (transition)	G -> A	ACG -> ACA		None	envelope glycoprotein CDS	588
129174	129174	1	SNP (transition)	G -> A	ACG -> ACA		None	envelope glycoprotein CDS	603
129189	129189	1	SNP (transition)	G -> A	ACG -> ACA		None	envelope glycoprotein CDS	618
129325	129327	2	Substitution	ACC -> GCA	ACC -> GCA	T -> A	Substitution	envelope glycoprotein CDS	754
129342	129342	1	SNP (transition)	C -> T	ACC -> ACT		None	envelope glycoprotein CDS	771
129345	129345	1	SNP (transition)	C -> T	ACC -> ACT		None	envelope glycoprotein CDS	774
129346	129346	1	SNP (transversion)	A -> T	ACT -> TCT	T -> S	Substitution	envelope glycoprotein CDS	775
129348	129348	1	SNP (transition)	T -> C	ACT -> ACC		None	envelope glycoprotein CDS	777
129349	129351	2	Substitution	GCG -> TCT	GCG -> TCT	A -> S	Substitution	envelope glycoprotein CDS	778
129354	129354	1	SNP (transversion)	T -> A	GCT -> GCA		None	envelope glycoprotein CDS	783
129372	129372	1	SNP (transition)	C -> T	ACC -> ACT		None	envelope glycoprotein CDS	801
129381	129381	1	SNP (transversion)	G -> T	GCG -> GCT		None	envelope glycoprotein CDS	810
132945	132945	1	SNP (transition)	T -> C	GTC -> GCC	V -> A	Substitution	envelope glycoprotein I CDS	365
137276	137276	1	SNP (transversion)	T -> G
137279	137279	1	SNP (transversion)	C -> A
137320	137320	1	SNP (transition)	T -> C
137566	137566	1	SNP (transition)	A -> G
137610	137609	0	Insertion	G
138404	138404	1	SNP (transition)	G -> A	CAG -> CAA		None	IR6 CDS	759
138427	138427	1	SNP (transition)	T -> C	TTT -> TCT	F -> S	Substitution	IR6 CDS	782
138688	138688	1	SNP (transition)	C -> T
138692	138695	4	Substitution	TACC -> CTTT
138697	138697	1	SNP (transition)	C -> T
138699	138699	1	SNP (transition)	C -> T
138701	>138703	>3	Insertion	CCC -> TTTG
138704	138703	0	Insertion	A
138704	138703	0	Insertion (tandem repeat)	(C)5 -> (C)6
138704	138703	0	Insertion	CA
138704	138703	0	Insertion (tandem repeat)	(C)5 -> (C)6
138704	138703	0	Insertion	G
138704	138703	0	Insertion	TA
138705	138706	2	Substitution	CG -> TA
138712	138712	1	SNP (transition)	C -> T
138714	138714	1	SNP (transition)	T -> C
138716	138716	1	SNP (transversion)	C -> A
138718	138719	2	Substitution	CT -> TC
138721	138726	6	Deletion	CCGCTC
138731	138731	1	SNP (transversion)	C -> A
138732	138732	1	SNP (transversion)	C -> G
138735	138735	1	SNP (transversion)	T -> G
138736	138736	1	SNP (transversion)	C -> G
138737	138737	1	SNP (transversion)	G -> C
138739	138739	1	SNP (transition)	C -> T
138740	138740	1	SNP (transition)	C -> T
138769	138769	1	SNP (transition)	C -> T
138856	138857	2	Deletion (tandem repeat)	(CC)5 -> (CC)4
139878	139885	8	Deletion	CCTCCCCC
139970	139970	1	SNP (transition)	G -> A
140257	140257	1	SNP (transition)	G -> A
140951	140951	1	SNP (transversion)	C -> A	GTG -> GTT		None	putative host range determinant protein CDS	285
141155	141235	81	Deletion	GAGGGGGCTGGTGGACGGCGTCCCCCGCTGGGCCATGCGGCAGGATCCGTCGCACGCCCCGCACGGCTGTCCGTGGGGCAT	ATG,CCC,CAC,GGA,CAG,CCG,TGC,GGG,GCG,TGC,GAC,GGA,TCC,TGC,CGC,ATG,GCC,CAG,CGG,GGG,ACG,CCG,TCC,ACC,AGC,CCC,CTC ->	MPHGQPCGACDGSCRMAQRGTPSTSPL ->	Start Codon Loss	putative host range determinant protein CDS	1
141236	141325	90	Deletion	GGCTGGGCCGGGGTCGCCGGAGCTGGGCTGGGCCGGGGTCGCCGGAGCTGGGCTGGGCCGGGGTCGCCGGAGCTGGGCTGGGCCGGGGTC
141877	141876	0	Insertion (tandem repeat)	(C)5 -> (C)6
141961	142054	94	Deletion	GTAACCGTATTTTAGCGCCCCCCCCCCCCCATAGCCGCATACCGTAACCCAGCCATGCTATCTGTTGCGCTCAAAAATTTTTGCCCCCCCCACC
142358	142358	1	SNP (transition)	C -> T
142369	142376	8	Deletion	GGGGGTGT
143206	143205	0	Insertion (tandem repeat)	(G)7 -> (G)8
143579	143579	1	SNP (transition)	A -> G
143896	143896	1	SNP (transition)	C -> T
144084	144084	1	SNP (transversion)	A -> C	GGA -> GGC		None	transcriptional regulator CDS	66
144252	144252	1	SNP (transition)	A -> G	GGA -> GGG		None	transcriptional regulator CDS	234
144841	144841	1	SNP (transversion)	G -> T	GCT -> TCT	A -> S	Substitution	transcriptional regulator CDS	823
145960	145960	1	SNP (transversion)	T -> A	TCC -> ACC	S -> T	Substitution	transcriptional regulator CDS	1942
147369	147369	1	SNP (transversion)	A -> C	CGA -> CGC		None	transcriptional regulator CDS	3351
147466	147466	1	SNP (transversion)	A -> C	AAC -> CAC	N -> H	Substitution	transcriptional regulator CDS	3448
148811	149074	264	Deletion	ACTGGGCGGGTTGATGGGCGGGTTGATGGGCGGGTTGATGGGCGGGTTGATGGGCGGGTTGATGGGCGGGTTGATGGGCGGGTTGATGGGCGGGTTGATGGGCGGGTTGATGGGCGGGTTGATGGGCGGGTTGATGGGCGGGTTGATGGTTCCTGCTCCTCCCCTTCCTGCTCCTCCCCTTCCTGCTCCTCCCCTTCCTGCTCCTCCCCTTCCTGCTCCTCCCCTTCCTGCTCCTCCCCTTCCTGCTCCTCCCCTTCCTGCTCC
149126	149175	50	Deletion	TCCTGCTCCTCCCCTTCCTGCTCCTCCCCTTCCTGCTCCTCCCCTTCCTG
149264	149266	3	Substitution	CCT -> GAA
149367	149409	43	Deletion	TTTGGCCCCCCCCCTTAGACCACGCCCCCCTATTCAAATGCGG -> C
149412	149413	2	Substitution	GT -> AA
149415	149415	1	SNP (transition)	A -> G
149417	149417	1	SNP (transversion)	A -> C
149417	149417	1	SNP (transition)	A -> G
149419	149419	1	SNP (transversion)	G -> C
149420	149420	1	SNP (transition)	C -> T
149421	149421	1	SNP (transversion)	G -> C
149422	149422	1	SNP (transversion)	G -> C
149423	149423	1	SNP (transversion)	G -> C

## Sheet: ST7-LS110114
Minimum	Maximum	Length	Polymorphism Type	Change	Codon Change	Amino Acid Change	Protein Effect	CDS	CDS Position
525	525	1	SNP (transition)	T -> C
526	526	1	SNP (transition)	G -> A
527	527	1	SNP (transversion)	C -> G
2096	2096	1	SNP (transition)	G -> A	TTC -> TTT		None	unknown CDS	450
5893	5892	0	Insertion (tandem repeat)	(TG)2 -> (TG)3
5898	5898	1	SNP (transition)	C -> T
6142	6142	1	SNP (transition)	C -> T	AAG -> AAA		None	glycoprotein K CDS	882
6330	6330	1	SNP (transition)	A -> G	TTG -> CTG		None	glycoprotein K CDS	694
8280	8280	1	SNP (transversion)	A -> C	CTC -> CGC	L -> R	Substitution	primase CDS	2003
10620	10620	1	SNP (transition)	A -> G	AAC -> GAC	N -> D	Substitution	unknown CDS	340
11158	11158	1	SNP (transition)	G -> A	TCC -> TCT		None	deoxyuridine triphosphatase CDS	939
13094	13094	1	SNP (transversion)	A -> C	AAG -> CAG	K -> Q	Substitution	tegument protein CDS	565
15178	15178	1	SNP (transversion)	C -> G
15383	15383	1	SNP (transversion)	C -> A	CGC -> CGA		None	tegument protein CDS	84
19862	19862	1	SNP (transition)	C -> T	GTC -> GTT		None	tegument protein CDS	1797
21073	21073	1	SNP (transition)	T -> C	CCA -> CCG		None	tegument/envelope protein CDS	66
21509	21509	1	SNP (transition)	G -> A	GTC -> GTT		None	glycoprotein C CDS	1335
22682	22682	1	SNP (transversion)	G -> T	GGC -> GGA		None	glycoprotein C CDS	162
27686	27686	1	SNP (transition)	A -> G	GAT -> GGT	D -> G	Substitution	tegument protein CDS	1433
28116	28116	1	SNP (transition)	A -> G	TTG -> CTG		None	small subunit of ribonucleotide reductase CDS	736
29134	29134	1	SNP (transition)	C -> T	AGA -> AAA	R -> K	Substitution	large subunit of ribonucleotide reductase CDS	2135
30411	30411	1	SNP (transition)	C -> T	ATG -> ATA	M -> I	Substitution	large subunit of ribonucleotide reductase CDS	858
30915	30915	1	SNP (transition)	G -> A	CTC -> CTT		None	large subunit of ribonucleotide reductase CDS	354
31502	31501	0	Insertion	G
31620	31620	1	SNP (transition)	G -> A	CCC -> TCC	P -> S	Substitution	capsid protein CDS	1288
31692	31692	1	SNP (transition)	A -> G	TTG -> CTG		None	capsid protein CDS	1216
39824	39824	1	SNP (transition)	T -> C	GTT -> GTC		None	very large tegument protein CDS	3246
44334	44334	1	SNP (transition)	A -> G	AGC -> GGC	S -> G	Substitution	very large tegument protein CDS	7756
44741	44741	1	SNP (transversion)	G -> T	ACG -> ACT		None	very large tegument protein CDS	8163
44872	44874	3	Substitution	CCC -> GGG	GCC,CCC -> GGG,GCC	AP -> GA	Substitution	very large tegument protein CDS	8294
44882	44882	1	SNP (transition)	G -> A	GCG -> GCA		None	very large tegument protein CDS	8304
44884	44887	4	Substitution	CCCC -> ATTT	GCC,CCG -> GAT,TTG	AP -> DL	Substitution	very large tegument protein CDS	8306
44892	44897	5	Substitution	AAATCT -> GGGGCC	AAA,TCT -> GGG,GCC	KS -> GA	Substitution	very large tegument protein CDS	8314
44901	44930	30	Deletion	GCGGCCCCCGCCGCGGCCCCGGCCAAATCT	GCG,GCC,CCC,GCC,GCG,GCC,CCG,GCC,AAA,TCT ->	AAPAAAPAKS ->	Deletion	very large tegument protein CDS	8323
44935	44935	1	SNP (transversion)	C -> G	GCG -> GGG	A -> G	Substitution	very large tegument protein CDS	8357
44938	44938	1	SNP (transition)	C -> T	GCC -> GTC	A -> V	Substitution	very large tegument protein CDS	8360
44940	44945	4	Substitution	CCCGCC -> TCTACG	CCC,GCC -> TCT,ACG	PA -> ST	Substitution	very large tegument protein CDS	8362
44948	44948	1	SNP (transition)	G -> A	GCG -> GCA		None	very large tegument protein CDS	8370
44950	44950	1	SNP (transversion)	C -> G	GCC -> GGC	A -> G	Substitution	very large tegument protein CDS	8372
44952	44960	9	Deletion	CCGGCCAAA	CCG,GCC,AAA ->	PAK ->	Deletion	very large tegument protein CDS	8374
44962	44963	2	Substitution	CT -> TC	TCT -> TTC	S -> F	Substitution	very large tegument protein CDS	8384
44964	44966	3	Substitution	GCG -> AAA	GCG -> AAA	A -> K	Substitution	very large tegument protein CDS	8386
44965	44965	1	SNP (transversion)	C -> G	GCG -> GGG	A -> G	Substitution	very large tegument protein CDS	8387
44967	44968	2	Substitution	GC -> TG	GCG -> TGG	A -> W	Substitution	very large tegument protein CDS	8389
44970	44972	2	Substitution	GCC -> TCT	GCC -> TCT	A -> S	Substitution	very large tegument protein CDS	8392
44973	44975	3	Substitution	CCC -> TTG	CCC -> TTG	P -> L	Substitution	very large tegument protein CDS	8395
44980	44980	1	SNP (transversion)	C -> G	GCG -> GGG	A -> G	Substitution	very large tegument protein CDS	8402
45255	45255	1	SNP (transition)	T -> C	TTG -> CTG		None	very large tegument protein CDS	8677
47189	47189	1	SNP (transition)	C -> T	CCG -> CCA		None	capsid protein CDS	57
50586	50586	1	SNP (transversion)	A -> C	AAG -> ACG	K -> T	Substitution	unknown CDS	35
52151	52151	1	SNP (transition)	T -> C	AAG -> GAG	K -> E	Substitution	DNA polymerase CDS	2968
52314	52314	1	SNP (transversion)	C -> A	CTG -> CTT		None	DNA polymerase CDS	2805
54195	54195	1	SNP (transition)	A -> G	TTT -> TTC		None	DNA polymerase CDS	924
55023	55023	1	SNP (transition)	C -> T	CAG -> CAA		None	DNA polymerase CDS	96
55378	55378	1	SNP (transition)	A -> G
55503	55503	1	SNP (transition)	C -> T	GTC -> GTT		None	ssDNA binding protein CDS	117
59301	59301	1	SNP (transition)	T -> C	TTG -> TCG	L -> S	Substitution	DNA packaging protein CDS	125
62709	62709	1	SNP (transition)	A -> G	TCA -> TCG		None	envelope glycoprotein B CDS	1344
63741	63741	1	SNP (transition)	C -> T	TAC -> TAT		None	envelope glycoprotein B CDS	2376
64708	64708	1	SNP (transition)	G -> A	GGT -> GAT	G -> D	Substitution	unknown CDS	197
65174	65174	1	SNP (transition)	C -> T	CAG -> CAA		None	capsid protein CDS	1854
65174	65174	1	SNP (transition)	C -> T	CAG -> CAA		None	major capsid scaffold protein CDS	903
67371	67371	1	SNP (transition)	C -> T	GAG -> GAA		None	unknown CDS	1539
68771	68771	1	SNP (transversion)	G -> T	CGC -> AGC	R -> S	Substitution	unknown CDS	139
70274	70274	1	SNP (transversion)	G -> T	TCG -> TCT		None	thymidine kinase CDS	432
72443	72443	1	SNP (transition)	T -> C	TTA -> TCA	L -> S	Substitution	envelope glycoprotein H CDS	1319
75571	75571	1	SNP (transition)	T -> C	CAT -> CGT	H -> R	Substitution	tegument protein CDS	587
75660	75660	1	SNP (transition)	A -> G	ACT -> ACC		None	tegument protein CDS	498
76703	76703	1	SNP (transition)	T -> C
77127	77128	2	Substitution	TA -> GG	CTT,AAC -> CTG,GAC	LN -> LD	Substitution	integral membrane protein CDS	402
81459	81459	1	SNP (transition)	G -> A	AGG -> AAG	R -> K	Substitution	major capsid protein CDS	3824
83179	83179	1	SNP (transition)	C -> T	GGC -> AGC	G -> S	Substitution	putative terminase CDS	2107
90132	90132	1	SNP (transversion)	C -> A	CTC -> CTA		None	tegument protein CDS	831
92166	92166	1	SNP (transition)	T -> C	TCG -> CCG	S -> P	Substitution	deoxyribonuclease CDS	1099
95157	95157	1	SNP (transition)	A -> G	ACT -> GCT	T -> A	Substitution	origin binding protein CDS	835
100176	100176	1	SNP (transition)	C -> T	CGA -> CAA	R -> Q	Substitution	minor capsid protein CDS	2147
100176	100176	1	SNP (transition)	C -> T	GAT -> AAT	D -> N	Substitution	unknown CDS	88
100917	100917	1	SNP (transition)	C -> T	AGA -> AAA	R -> K	Substitution	minor capsid protein CDS	1406
103442	103442	1	SNP (transversion)	A -> C	ACA -> ACC		None	component of DNA helicase-primase complex CDS	1137
103958	103958	1	SNP (transition)	G -> A	TCG -> TCA		None	component of DNA helicase-primase complex CDS	1653
107935	107935	1	SNP (transition)	T -> C	GAA -> GAG		None	uracil-DNA glycosylase CDS	141
108991	108991	1	SNP (transition)	A -> G
108992	108992	1	SNP (transversion)	A -> C
108996	108996	1	SNP (transversion)	G -> C
109144	109144	1	SNP (transition)	A -> G
109256	109256	1	SNP (transition)	G -> A
109319	109319	1	SNP (transition)	A -> G
109747	109747	1	SNP (transition)	G -> A
109757	109757	1	SNP (transition)	A -> G
110356	110356	1	SNP (transition)	T -> C	CAA -> CAG		None	transcriptional regulator CDS	1596
112352	112407	56	Deletion	CCCTGCCCTAGCCCCCTGCCCTAGCCCCCTGCCCTAGCCCCCTGCCCTAGCCCCCT
112484	112483	0	Insertion (tandem repeat)	(C)8 -> (C)9
112794	112794	1	SNP (transversion)	A -> C
112885	112885	1	Deletion (tandem repeat)	(C)7 -> (C)6
112929	112929	1	SNP (transition)	T -> C
112946	112946	1	SNP (transition)	C -> T
113081	113625	545	Deletion	AGGCGGTAGTGACGTAGCGGAAGGGGAGGAGCAGGAAGGGGAGGAGCAGGAAGGGGAGGAGCAGGAAGGGGAGGAGCAGGAAGGGGAGGAGCAGGAAGGGGAGGAGCAGGAAGGGGAGGAGCAGGAAGGGGAGGAGCAGGAAGGGGAGGAGCAGGAAGGGGAGGAGCAGGAAGGGGAGGAGCAGGAAGGGGAGGAGCAGGAAGGGGAGGAGCAGGAAGGGGAGGAGCAGGAAGGGGAGGAGCAGGAAGGGGAGGAGCAGGAAGGGGAGGAGCAGGAACCATCAACCCGCCCATCAACCCGCCCATCAACCCGCCCATCAACCCGCCCATCAACCCGCCCATCAACCCGCCCATCAACCCGCCCATCAACCCGCCCATCAACCCGCCCATCAACCCGCCC…
114948	114948	1	SNP (transversion)	T -> G	CGA -> CGC		None	transcriptional regulator CDS	3351
117957	117957	1	SNP (transversion)	G -> T	GCC -> GCA		None	transcriptional regulator CDS	342
118233	118233	1	SNP (transversion)	T -> G	GGA -> GGC		None	transcriptional regulator CDS	66
118737	118737	1	SNP (transition)	T -> C
119503	119503	1	SNP (transition)	G -> A
119938	119957	20	Deletion	TCCACACCCCCCCCATGCCC
120201	120200	0	Insertion (tandem repeat)	(G)8 -> (G)9
120262	120302	41	Deletion	GGGTGGGGGGGGCAAAAATTTTTGAGCGCAACAGATAGCAT
120305	120305	1	SNP (transversion)	C -> G
120306	120306	1	SNP (transversion)	T -> G
120327	120331	5	Deletion	GGGGG
120436	120435	0	Insertion (tandem repeat)	(G)5 -> (G)6
120568	120568	1	SNP (transversion)	C -> A
120814	120820	7	Deletion (tandem repeat)	(GGTGGTC)10 -> (GGTGGTC)9
120997	121081	85	Deletion	CGGCCCAGCCCAGCTCCGGCGACCCCGGCCCAGCCCAGCTCCGGCGACCCCGGCCCAGCCCAGCTCCGGCGACCCCGGCCCAGCC
121082	121154	73	Deletion	ATGCCCCACGGACAGCCGTGCGGGGCGTGCGACGGATCCTGCCGCATGGCCCAGCGGGGGACGCCGTCCACCA	ATG,CCC,CAC,GGA,CAG,CCG,TGC,GGG,GCG,TGC,GAC,GGA,TCC,TGC,CGC,ATG,GCC,CAG,CGG,GGG,ACG,CCG,TCC,ACC,AGC ->	MPHGQPCGACDGSCRMAQRGTPSTS ->	Start Codon Loss	putative host range determinant protein CDS	1
121265	121265	1	SNP (transition)	G -> A	GAC -> AAC	D -> N	Substitution	putative host range determinant protein CDS	184
122417	122443	27	Deletion	AAGGGTGGGGTGGGGGGGGGAGGAGGA
123452	123452	1	Deletion (tandem repeat)	(G)10 -> (G)9
123548	123548	1	SNP (transition)	G -> A
123575	123592	18	Deletion	GAGGCCGAGCGGGGGAGA
123594	123594	1	SNP (transition)	C -> T
123611	123636	26	Deletion	CGGGGGAGAGCGGTAGGGGAGGCCGA
123890	123890	1	SNP (transition)	A -> G	TTT -> TCT	F -> S	Substitution	IR6 CDS	782
124708	124707	0	Insertion	C			Frame Shift	ORF68 CDS	1044
124997	124997	1	SNP (transition)	A -> G	TGG -> CGG	W -> R	Substitution	ORF68 CDS	754
124997	124997	1	SNP (transition)	A -> G	TGG -> CGG	W -> R	Substitution	truncated virion membrane protein CDS	754
125032	125032	1	SNP (transversion)	C -> A	CGG -> CTG	R -> L	Substitution	ORF68 CDS	719
125032	125032	1	SNP (transversion)	C -> A	CGG -> CTG	R -> L	Substitution	truncated virion membrane protein CDS	719
125415	125415	1	SNP (transition)	A -> G	CTT -> CTC		None	ORF68 CDS	336
125415	125415	1	SNP (transition)	A -> G	CTT -> CTC		None	truncated virion membrane protein CDS	336
128664	128664	1	SNP (transition)	T -> C	TCT -> TCC		None	envelope glycoprotein CDS	93
129144	129144	1	SNP (transition)	G -> A	ACG -> ACA		None	envelope glycoprotein CDS	573
129159	129159	1	SNP (transition)	G -> A	ACG -> ACA		None	envelope glycoprotein CDS	588
129174	129174	1	SNP (transition)	G -> A	ACG -> ACA		None	envelope glycoprotein CDS	603
129189	129189	1	SNP (transition)	G -> A	ACG -> ACA		None	envelope glycoprotein CDS	618
129204	129204	1	SNP (transversion)	A -> C	ACA -> ACC		None	envelope glycoprotein CDS	633
129207	129207	1	SNP (transition)	A -> G	GCA -> GCG		None	envelope glycoprotein CDS	636
129210	129210	1	SNP (transversion)	A -> T	GCA -> GCT		None	envelope glycoprotein CDS	639
129213	129213	1	SNP (transversion)	G -> T	ACG -> ACT		None	envelope glycoprotein CDS	642
129216	129216	1	SNP (transition)	C -> T	ACC -> ACT		None	envelope glycoprotein CDS	645
129217	129219	2	Substitution	ACA -> TCC	ACA -> TCC	T -> S	Substitution	envelope glycoprotein CDS	646
129220	129222	2	Substitution	GCA -> TCT	GCA -> TCT	A -> S	Substitution	envelope glycoprotein CDS	649
129228	129228	1	SNP (transversion)	G -> C	ACG -> ACC		None	envelope glycoprotein CDS	657
129325	129327	2	Substitution	ACC -> GCA	ACC -> GCA	T -> A	Substitution	envelope glycoprotein CDS	754
129335	129334	0	Insertion	CGGCTACCACCACCG	GCG -> GCG,GCT,ACC,ACC,ACC,GCG	A -> AATTTA	Insertion	envelope glycoprotein CDS	764
129348	129348	1	SNP (transition)	T -> C	ACT -> ACC		None	envelope glycoprotein CDS	777
129420	129434	15	Deletion (tandem repeat)	(GCGGCTACCACCACC)13 -> (GCGGCTACCACCACC)12	ACC,ACC,GCG,GCT,ACC,ACC -> ACC	TTAATT -> T	Deletion	envelope glycoprotein CDS	849
132326	132326	1	SNP (transition)	C -> T	GTC -> GTT		None	envelope glycoprotein D CDS	1062
132945	132945	1	SNP (transition)	T -> C	GTC -> GCC	V -> A	Substitution	envelope glycoprotein I CDS	365
137171	137171	1	SNP (transition)	G -> A
137285	137285	1	SNP (transversion)	G -> T
137320	137320	1	SNP (transition)	T -> C
137610	137609	0	Insertion	G
138427	138427	1	SNP (transition)	T -> C	TTT -> TCT	F -> S	Substitution	IR6 CDS	782
138686	138738	53	Deletion	CTCCCCTACCGCTCTCCCCCGCTCGGCCTCCCCTACCGCTCTCCCCCGCTCGG
138740	138740	1	SNP (transition)	C -> T
138769	138769	1	SNP (transition)	C -> T
138856	138856	1	Deletion (tandem repeat)	(C)10 -> (C)9
139881	139883	3	Deletion (tandem repeat)	(CCC)3 -> (CCC)2
141052	141052	1	SNP (transition)	C -> T	GAC -> AAC	D -> N	Substitution	putative host range determinant protein CDS	184
141078	141078	1	SNP (transversion)	A -> C	GTG -> GGG	V -> G	Substitution	putative host range determinant protein CDS	158
141080	141079	0	Insertion	T			Frame Shift	putative host range determinant protein CDS	157
141084	141084	1	SNP (transversion)	A -> C	GTG -> GGG	V -> G	Substitution	putative host range determinant protein CDS	152
141108	141235	128	Deletion	CGTGGGGACGGGTCCCCCGCCGGGGGCGAGGGGGTCAGGGACGGGATGAGGGGGCTGGTGGACGGCGTCCCCCGCTGGGCCATGCGGCAGGATCCGTCGCACGCCCCGCACGGCTGTCCGTGGGGCAT	ATG,CCC,CAC,GGA,CAG,CCG,TGC,GGG,GCG,TGC,GAC,GGA,TCC,TGC,CGC,ATG,GCC,CAG,CGG,GGG,ACG,CCG,TCC,ACC,AGC,CCC,CTC,ATC,CCG,TCC,CTG,ACC,CCC,TCG,CCC,CCG,GCG,GGG,GAC,CCG,TCC,CCA,CGC ->	MPHGQPCGACDGSCRMAQRGTPSTSPLIPSLTPSPPAGDPSPR ->	Start Codon Loss	putative host range determinant protein CDS	1
141236	141277	42	Deletion	GGCTGGGCCGGGGTCGCCGGAGCTGGGCTGGGCCGGGGTCGC
141749	141749	1	SNP (transversion)	G -> T
141867	141885	19	Deletion	CACGCCCCCACCCCCATCT
141938	142051	114	Deletion	ACCTCGACGAGAGTATGTGCCGGGTAACCGTATTTTAGCGCCCCCCCCCCCCCATAGCCGCATACCGTAACCCAGCCATGCTATCTGTTGCGCTCAAAAATTTTTGCCCCCCCC
142109	142108	0	Insertion (tandem repeat)	(C)8 -> (C)9
142814	142814	1	SNP (transition)	C -> T
143580	143580	1	SNP (transition)	A -> G
144084	144084	1	SNP (transversion)	A -> C	GGA -> GGC		None	transcriptional regulator CDS	66
144360	144360	1	SNP (transversion)	C -> A	GCC -> GCA		None	transcriptional regulator CDS	342
147369	147369	1	SNP (transversion)	A -> C	CGA -> CGC		None	transcriptional regulator CDS	3351
148791	149310	520	Deletion	TGACCGCGTGGTCTTTGTTTACTGGGCGGGTTGATGGGCGGGTTGATGGGCGGGTTGATGGGCGGGTTGATGGGCGGGTTGATGGGCGGGTTGATGGGCGGGTTGATGGGCGGGTTGATGGGCGGGTTGATGGGCGGGTTGATGGGCGGGTTGATGGGCGGGTTGATGGTTCCTGCTCCTCCCCTTCCTGCTCCTCCCCTTCCTGCTCCTCCCCTTCCTGCTCCTCCCCTTCCTGCTCCTCCCCTTCCTGCTCCTCCCCTTCCTGCTCCTCCCCTTCCTGCTCCTCCCCTTCCTGCTCCTCCCCTTCCTGCTCCTCCCCTTCCTGCTCCTCCCCTTCCTGCTCCTCCCCTTCCTGCTCCTCCCCTTCCTGCTCCTCCCCTTCCTGCTCCTCCCCTTCCT…

## Sheet: ST8-LS110976
Minimum	Maximum	Length	Polymorphism Type	Change	Codon Change	Amino Acid Change	Protein Effect	CDS	CDS Position
534	534	1	SNP (transition)	T -> C
540	540	1	SNP (transversion)	C -> G
541	541	1	SNP (transversion)	T -> G
543	543	1	SNP (transversion)	T -> G
547	547	1	Deletion (tandem repeat)	(G)4 -> (G)3
549	549	1	SNP (transition)	G -> A
549	549	1	SNP (transversion)	G -> C
552	552	1	SNP (transition)	T -> C
556	556	1	SNP (transversion)	T -> A
559	559	1	SNP (transversion)	T -> G
561	561	1	SNP (transversion)	T -> G
564	564	1	SNP (transition)	T -> C
566	566	1	SNP (transversion)	G -> C
568	568	1	SNP (transversion)	G -> C
570	570	1	SNP (transition)	T -> C
577	577	1	SNP (transversion)	T -> G
578	578	1	SNP (transition)	A -> G
584	584	1	SNP (transversion)	G -> C
585	585	1	SNP (transition)	G -> A
2096	2096	1	SNP (transition)	G -> A	TTC -> TTT		None	unknown CDS	450
5896	5895	0	Insertion (tandem repeat)	(TG)2 -> (TG)3
5898	5898	1	SNP (transition)	C -> T
6142	6142	1	SNP (transition)	C -> T	AAG -> AAA		None	glycoprotein K CDS	882
6330	6330	1	SNP (transition)	A -> G	TTG -> CTG		None	glycoprotein K CDS	694
8280	8280	1	SNP (transversion)	A -> C	CTC -> CGC	L -> R	Substitution	primase CDS	2003
10620	10620	1	SNP (transition)	A -> G	AAC -> GAC	N -> D	Substitution	unknown CDS	340
11158	11158	1	SNP (transition)	G -> A	TCC -> TCT		None	deoxyuridine triphosphatase CDS	939
13094	13094	1	SNP (transversion)	A -> C	AAG -> CAG	K -> Q	Substitution	tegument protein CDS	565
15178	15178	1	SNP (transversion)	C -> G
15383	15383	1	SNP (transversion)	C -> A	CGC -> CGA		None	tegument protein CDS	84
19862	19862	1	SNP (transition)	C -> T	GTC -> GTT		None	tegument protein CDS	1797
21073	21073	1	SNP (transition)	T -> C	CCA -> CCG		None	tegument/envelope protein CDS	66
21509	21509	1	SNP (transition)	G -> A	GTC -> GTT		None	glycoprotein C CDS	1335
22682	22682	1	SNP (transversion)	G -> T	GGC -> GGA		None	glycoprotein C CDS	162
27686	27686	1	SNP (transition)	A -> G	GAT -> GGT	D -> G	Substitution	tegument protein CDS	1433
28116	28116	1	SNP (transition)	A -> G	TTG -> CTG		None	small subunit of ribonucleotide reductase CDS	736
29134	29134	1	SNP (transition)	C -> T	AGA -> AAA	R -> K	Substitution	large subunit of ribonucleotide reductase CDS	2135
30411	30411	1	SNP (transition)	C -> T	ATG -> ATA	M -> I	Substitution	large subunit of ribonucleotide reductase CDS	858
30915	30915	1	SNP (transition)	G -> A	CTC -> CTT		None	large subunit of ribonucleotide reductase CDS	354
31502	31501	0	Insertion	G
31620	31620	1	SNP (transition)	G -> A	CCC -> TCC	P -> S	Substitution	capsid protein CDS	1288
31692	31692	1	SNP (transition)	A -> G	TTG -> CTG		None	capsid protein CDS	1216
39824	39824	1	SNP (transition)	T -> C	GTT -> GTC		None	very large tegument protein CDS	3246
44334	44334	1	SNP (transition)	A -> G	AGC -> GGC	S -> G	Substitution	very large tegument protein CDS	7756
44741	44741	1	SNP (transversion)	G -> T	ACG -> ACT		None	very large tegument protein CDS	8163
44872	44873	2	Substitution	CC -> GG	GCC -> GGG	A -> G	Substitution	very large tegument protein CDS	8294
44874	44874	1	SNP (transversion)	C -> G	CCC -> GCC	P -> A	Substitution	very large tegument protein CDS	8296
44882	44882	1	SNP (transition)	G -> A	GCG -> GCA		None	very large tegument protein CDS	8304
44884	44892	9	Deletion	CCCCGGCCA -> ATT			Truncation	very large tegument protein CDS	8306
44904	44944	41	Deletion	GCCCCCGCCGCGGCCCCGGCCAAATCTGCGGCGGCCCCCGC			Frame Shift	very large tegument protein CDS	8326
45255	45255	1	SNP (transition)	T -> C	TTG -> CTG		None	very large tegument protein CDS	8677
47189	47189	1	SNP (transition)	C -> T	CCG -> CCA		None	capsid protein CDS	57
50586	50586	1	SNP (transversion)	A -> C	AAG -> ACG	K -> T	Substitution	unknown CDS	35
52151	52151	1	SNP (transition)	T -> C	AAG -> GAG	K -> E	Substitution	DNA polymerase CDS	2968
52314	52314	1	SNP (transversion)	C -> A	CTG -> CTT		None	DNA polymerase CDS	2805
54195	54195	1	SNP (transition)	A -> G	TTT -> TTC		None	DNA polymerase CDS	924
55023	55023	1	SNP (transition)	C -> T	CAG -> CAA		None	DNA polymerase CDS	96
55378	55378	1	SNP (transition)	A -> G
55503	55503	1	SNP (transition)	C -> T	GTC -> GTT		None	ssDNA binding protein CDS	117
59301	59301	1	SNP (transition)	T -> C	TTG -> TCG	L -> S	Substitution	DNA packaging protein CDS	125
62709	62709	1	SNP (transition)	A -> G	TCA -> TCG		None	envelope glycoprotein B CDS	1344
63741	63741	1	SNP (transition)	C -> T	TAC -> TAT		None	envelope glycoprotein B CDS	2376
64708	64708	1	SNP (transition)	G -> A	GGT -> GAT	G -> D	Substitution	unknown CDS	197
65174	65174	1	SNP (transition)	C -> T	CAG -> CAA		None	capsid protein CDS	1854
65174	65174	1	SNP (transition)	C -> T	CAG -> CAA		None	major capsid scaffold protein CDS	903
67371	67371	1	SNP (transition)	C -> T	GAG -> GAA		None	unknown CDS	1539
68771	68771	1	SNP (transversion)	G -> T	CGC -> AGC	R -> S	Substitution	unknown CDS	139
70274	70274	1	SNP (transversion)	G -> T	TCG -> TCT		None	thymidine kinase CDS	432
72443	72443	1	SNP (transition)	T -> C	TTA -> TCA	L -> S	Substitution	envelope glycoprotein H CDS	1319
73896	73895	0	Insertion (tandem repeat)	(GCGGGAGCGAGGGCTGCTGCGGCGGCGGCGCG)9 -> (GCGGGAGCGAGGGCTGCTGCGGCGGCGGCGCG)12
73911	74006	96	Deletion (tandem repeat)	(GCGGGAGCGAGGGCTGCTGCGGCGGCGGCGCG)9 -> (GCGGGAGCGAGGGCTGCTGCGGCGGCGGCGCG)6
75571	75571	1	SNP (transition)	T -> C	CAT -> CGT	H -> R	Substitution	tegument protein CDS	587
75660	75660	1	SNP (transition)	A -> G	ACT -> ACC		None	tegument protein CDS	498
76703	76703	1	SNP (transition)	T -> C
77127	77128	2	Substitution	TA -> GG	CTT,AAC -> CTG,GAC	LN -> LD	Substitution	integral membrane protein CDS	402
81459	81459	1	SNP (transition)	G -> A	AGG -> AAG	R -> K	Substitution	major capsid protein CDS	3824
83179	83179	1	SNP (transition)	C -> T	GGC -> AGC	G -> S	Substitution	putative terminase CDS	2107
90132	90132	1	SNP (transversion)	C -> A	CTC -> CTA		None	tegument protein CDS	831
92166	92166	1	SNP (transition)	T -> C	TCG -> CCG	S -> P	Substitution	deoxyribonuclease CDS	1099
95157	95157	1	SNP (transition)	A -> G	ACT -> GCT	T -> A	Substitution	origin binding protein CDS	835
100176	100176	1	SNP (transition)	C -> T	GAT -> AAT	D -> N	Substitution	unknown CDS	88
100176	100176	1	SNP (transition)	C -> T	CGA -> CAA	R -> Q	Substitution	minor capsid protein CDS	2147
100917	100917	1	SNP (transition)	C -> T	AGA -> AAA	R -> K	Substitution	minor capsid protein CDS	1406
103442	103442	1	SNP (transversion)	A -> C	ACA -> ACC		None	component of DNA helicase-primase complex CDS	1137
103958	103958	1	SNP (transition)	G -> A	TCG -> TCA		None	component of DNA helicase-primase complex CDS	1653
107935	107935	1	SNP (transition)	T -> C	GAA -> GAG		None	uracil-DNA glycosylase CDS	141
108991	108991	1	SNP (transition)	A -> G
108992	108992	1	SNP (transversion)	A -> C
109144	109144	1	SNP (transition)	A -> G
109256	109256	1	SNP (transition)	G -> A
109319	109319	1	SNP (transition)	A -> G
109747	109747	1	SNP (transition)	G -> A
109757	109757	1	SNP (transition)	A -> G
110356	110356	1	SNP (transition)	T -> C	CAA -> CAG		None	transcriptional regulator CDS	1596
112345	112407	63	Deletion	CCTAGCCCCCTGCCCTAGCCCCCTGCCCTAGCCCCCTGCCCTAGCCCCCTGCCCTAGCCCCCT
112484	112483	0	Insertion (tandem repeat)	(CC)4 -> (CC)5
112794	112794	1	SNP (transversion)	A -> C
112885	112885	1	Deletion (tandem repeat)	(C)7 -> (C)6
112929	112929	1	SNP (transition)	T -> C
112946	112946	1	SNP (transition)	C -> T
113045	113059	15	Deletion (tandem repeat)	(TGACGTAGGCGGTAG)3 -> (TGACGTAGGCGGTAG)2
113132	113667	536	Deletion	-AGGGGAGGAGCAGGAAGGGGAGGAGCAGGAAGGGGAGGAGCAGGAAGGGGAGGAGCAGGAAGGGGAGGAGCAGGAAGGGGAGGAGCAGGAAGGGGAGGAGCAGGAAGGGGAGGAGCAGGAAGGGGAGGAGCAGGAAGGGGAGGAGCAGGAAGGGGAGGAGCAGGAAGGGGAGGAGCAGGAAGGGGAGGAGCAGGAAGGGGAGGAGCAGGAAGGGGAGGAGCAGGAACCATCAACCCGCCCATCAACCCGCCCATCAACCCGCCCATCAACCCGCCCATCAACCCGCCCATCAACCCGCCCATCAACCCGCCCATCAACCCGCCCATCAACCCGCCCATCAACCCGCCCATCAACCCGCCCATCAACCCGCCCAGTAAACAAAGACCACGCGGTCAATC…
114948	114948	1	SNP (transversion)	T -> G	CGA -> CGC		None	transcriptional regulator CDS	3351
117957	117957	1	SNP (transversion)	G -> T	GCC -> GCA		None	transcriptional regulator CDS	342
118233	118233	1	SNP (transversion)	T -> G	GGA -> GGC		None	transcriptional regulator CDS	66
118737	118737	1	SNP (transition)	T -> C
119503	119503	1	SNP (transition)	G -> A
119866	119866	1	SNP (transition)	A -> G
119915	119931	17	Deletion	CCGGTACCCACCTTCCA
119944	119944	1	Deletion (tandem repeat)	(C)8 -> (C)7
120209	120208	0	Insertion (tandem repeat)	(G)8 -> (G)9
120263	120376	114	Deletion	GGTGGGGGGGGCAAAAATTTTTGAGCGCAACAGATAGCATGGCTGGGTTACGGTATGCGGCTATGGGGGGGGGGGGGCGCTAAAATACGGTTACCCGGCACATACTCTCGTCGA
120436	120435	0	Insertion (tandem repeat)	(G)5 -> (G)6
120568	120568	1	SNP (transversion)	C -> A
120819	120825	7	Deletion (tandem repeat)	(GGTGGTC)10 -> (GGTGGTC)9
120977	120982	6	Deletion	CAGCCC -> GTT
120984	120984	1	SNP (transversion)	G -> T
120989	120989	1	SNP (transition)	G -> A
120992	120992	1	SNP (transition)	G -> A
120995	121004	10	Deletion	CCCGGCCCAG
121144	121168	25	Deletion	GCCGTCCACCAGCCCCCTCATCCCG			Frame Shift	putative host range determinant protein CDS	63
121265	121265	1	SNP (transition)	G -> A	GAC -> AAC	D -> N	Substitution	putative host range determinant protein CDS	184
122422	122446	25	Deletion	TGGGGTGGGGGGGGGAGGAGGAACA
123452	123452	1	Deletion (tandem repeat)	(G)10 -> (G)9
123548	123548	1	SNP (transition)	G -> A
123563	123625	63	Deletion	AGAGCGGTAGGGGAGGCCGAGCGGGGGAGAGCGGTAGGGGAGGCCGAGCGGGGGAGAGCGGTA
123890	123890	1	SNP (transition)	A -> G	TTT -> TCT	F -> S	Substitution	IR6 CDS	782
124708	124707	0	Insertion	C			Frame Shift	ORF68 CDS	1044
124997	124997	1	SNP (transition)	A -> G	TGG -> CGG	W -> R	Substitution	ORF68 CDS	754
124997	124997	1	SNP (transition)	A -> G	TGG -> CGG	W -> R	Substitution	truncated virion membrane protein CDS	754
125032	125032	1	SNP (transversion)	C -> A	CGG -> CTG	R -> L	Substitution	ORF68 CDS	719
125032	125032	1	SNP (transversion)	C -> A	CGG -> CTG	R -> L	Substitution	truncated virion membrane protein CDS	719
125415	125415	1	SNP (transition)	A -> G	CTT -> CTC		None	ORF68 CDS	336
125415	125415	1	SNP (transition)	A -> G	CTT -> CTC		None	truncated virion membrane protein CDS	336
128664	128664	1	SNP (transition)	T -> C	TCT -> TCC		None	envelope glycoprotein CDS	93
129144	129144	1	SNP (transition)	G -> A	ACG -> ACA		None	envelope glycoprotein CDS	573
129159	129159	1	SNP (transition)	G -> A	ACG -> ACA		None	envelope glycoprotein CDS	588
129174	129174	1	SNP (transition)	G -> A	ACG -> ACA		None	envelope glycoprotein CDS	603
129189	129189	1	SNP (transversion)	G -> C	ACG -> ACC		None	envelope glycoprotein CDS	618
129192	129192	1	SNP (transition)	A -> G	GCA -> GCG		None	envelope glycoprotein CDS	621
129195	129195	1	SNP (transversion)	A -> T	GCA -> GCT		None	envelope glycoprotein CDS	624
129198	129198	1	SNP (transversion)	G -> T	ACG -> ACT		None	envelope glycoprotein CDS	627
129201	129207	5	Substitution	CACAGCA -> TTCCTCT	ACC,ACA,GCA -> ACT,TCC,TCT	TTA -> TSS	Substitution	envelope glycoprotein CDS	630
129213	129213	1	SNP (transversion)	G -> C	ACG -> ACC		None	envelope glycoprotein CDS	642
129217	129219	2	Substitution	ACA -> GCG	ACA -> GCG	T -> A	Substitution	envelope glycoprotein CDS	646
129222	129222	1	SNP (transversion)	A -> T	GCA -> GCT		None	envelope glycoprotein CDS	651
129223	129225	2	Substitution	GCA -> ACT	GCA -> ACT	A -> T	Substitution	envelope glycoprotein CDS	652
129325	129327	2	Substitution	ACC -> GCA	ACC -> GCA	T -> A	Substitution	envelope glycoprotein CDS	754
129348	129348	1	SNP (transition)	T -> C	ACT -> ACC		None	envelope glycoprotein CDS	777
132326	132326	1	SNP (transition)	C -> T	GTC -> GTT		None	envelope glycoprotein D CDS	1062
132945	132945	1	SNP (transition)	T -> C	GTC -> GCC	V -> A	Substitution	envelope glycoprotein I CDS	365
137171	137171	1	SNP (transition)	G -> A
137285	137285	1	SNP (transversion)	G -> T
137320	137320	1	SNP (transition)	T -> C
137610	137609	0	Insertion	G
138427	138427	1	SNP (transition)	T -> C	TTT -> TCT	F -> S	Substitution	IR6 CDS	782
138688	138740	53	Deletion	CCCCTACCGCTCTCCCCCGCTCGGCCTCCCCTACCGCTCTCCCCCGCTCGGCC
138749	138749	1	SNP (transversion)	C -> G
138750	138750	1	SNP (transversion)	G -> T
138751	138751	1	SNP (transition)	C -> T
138753	138753	1	SNP (transition)	C -> T
138755	138757	3	Substitution	CCC -> TTG
138760	138764	5	Substitution	GCTCG -> CAGTA
138767	138769	3	Substitution	CTC -> AGT
138771	138772	2	Substitution	CC -> TG
138774	138774	1	SNP (transversion)	T -> G
138778	138782	5	Deletion	TTTTT -> G
138856	138856	1	Deletion (tandem repeat)	(C)10 -> (C)9
139881	139883	3	Deletion (tandem repeat)	(CCC)3 -> (CCC)2
141052	141052	1	SNP (transition)	C -> T	GAC -> AAC	D -> N	Substitution	putative host range determinant protein CDS	184
141157	141235	79	Deletion	GGGGGCTGGTGGACGGCGTCCCCCGCTGGGCCATGCGGCAGGATCCGTCGCACGCCCCGCACGGCTGTCCGTGGGGCAT	ATG,CCC,CAC,GGA,CAG,CCG,TGC,GGG,GCG,TGC,GAC,GGA,TCC,TGC,CGC,ATG,GCC,CAG,CGG,GGG,ACG,CCG,TCC,ACC,AGC,CCC,CTC ->	MPHGQPCGACDGSCRMAQRGTPSTSPL ->	Start Codon Loss	putative host range determinant protein CDS	1
141236	141339	104	Deletion	GGCTGGGCCGGGGTCGCCGGAGCTGGGCTGGGCCGGGGTCGCCGGAGCTGGGCTGGGCCGGGGTCGCCGGAGCTGGGCTGGGCCGGGGTCGCCGGAGCTGGGCT
141749	141749	1	SNP (transversion)	G -> T
141877	141876	0	Insertion (tandem repeat)	(C)5 -> (C)6
141978	141982	5	Deletion	CCCCC
142021	142054	34	Deletion	TCTGTTGCGCTCAAAAATTTTTGCCCCCCCCACC
142109	142108	0	Insertion (tandem repeat)	(C)8 -> (C)9
142814	142814	1	SNP (transition)	C -> T
143580	143580	1	SNP (transition)	A -> G
144084	144084	1	SNP (transversion)	A -> C	GGA -> GGC		None	transcriptional regulator CDS	66
144360	144360	1	SNP (transversion)	C -> A	GCC -> GCA		None	transcriptional regulator CDS	342
147369	147369	1	SNP (transversion)	A -> C	CGA -> CGC		None	transcriptional regulator CDS	3351
148612	148661	50	Deletion	GCCCTCTGCTGACGCGAAGACAAGGCCCTCCCCGGACGACATGTGAGGAA
148811	149257	447	Deletion	ACTGGGCGGGTTGATGGGCGGGTTGATGGGCGGGTTGATGGGCGGGTTGATGGGCGGGTTGATGGGCGGGTTGATGGGCGGGTTGATGGGCGGGTTGATGGGCGGGTTGATGGGCGGGTTGATGGGCGGGTTGATGGGCGGGTTGATGGTTCCTGCTCCTCCCCTTCCTGCTCCTCCCCTTCCTGCTCCTCCCCTTCCTGCTCCTCCCCTTCCTGCTCCTCCCCTTCCTGCTCCTCCCCTTCCTGCTCCTCCCCTTCCTGCTCCTCCCCTTCCTGCTCCTCCCCTTCCTGCTCCTCCCCTTCCTGCTCCTCCCCTTCCTGCTCCTCCCCTTCCTGCTCCTCCCCTTCCTGCTCCTCCCCTTCCTGCTCCTCCCCTTCCTGCTCCTCCCCTTCCTGCTCC…
149371	149371	1	SNP (transition)	G -> A
149388	149388	1	SNP (transition)	A -> G
149430	149430	1	SNP (transversion)	G -> T

## Sheet: ST9-LS111457
Minimum	Maximum	Length	Polymorphism Type	Change	Codon Change	Amino Acid Change	Protein Effect	CDS	CDS Position
429	446	18	Deletion (tandem repeat)	(TGGGGCTCACTGCTATGC)19 -> (TGGGGCTCACTGCTATGC)18
570	570	1	SNP (transition)	T -> C
679	678	0	Insertion (tandem repeat)	(TGGGGCTCACTGCTATGC)19 -> (TGGGGCTCACTGCTATGC)20
2096	2096	1	SNP (transition)	G -> A	TTC -> TTT		None	unknown CDS	450
5893	5892	0	Insertion (tandem repeat)	(TG)2 -> (TG)3
5898	5898	1	SNP (transition)	C -> T
6142	6142	1	SNP (transition)	C -> T	AAG -> AAA		None	glycoprotein K CDS	882
6330	6330	1	SNP (transition)	A -> G	TTG -> CTG		None	glycoprotein K CDS	694
8280	8280	1	SNP (transversion)	A -> C	CTC -> CGC	L -> R	Substitution	primase CDS	2003
10620	10620	1	SNP (transition)	A -> G	AAC -> GAC	N -> D	Substitution	unknown CDS	340
11158	11158	1	SNP (transition)	G -> A	TCC -> TCT		None	deoxyuridine triphosphatase CDS	939
13094	13094	1	SNP (transversion)	A -> C	AAG -> CAG	K -> Q	Substitution	tegument protein CDS	565
15178	15178	1	SNP (transversion)	C -> G
15383	15383	1	SNP (transversion)	C -> A	CGC -> CGA		None	tegument protein CDS	84
19862	19862	1	SNP (transition)	C -> T	GTC -> GTT		None	tegument protein CDS	1797
21073	21073	1	SNP (transition)	T -> C	CCA -> CCG		None	tegument/envelope protein CDS	66
21509	21509	1	SNP (transition)	G -> A	GTC -> GTT		None	glycoprotein C CDS	1335
22682	22682	1	SNP (transversion)	G -> T	GGC -> GGA		None	glycoprotein C CDS	162
27686	27686	1	SNP (transition)	A -> G	GAT -> GGT	D -> G	Substitution	tegument protein CDS	1433
28116	28116	1	SNP (transition)	A -> G	TTG -> CTG		None	small subunit of ribonucleotide reductase CDS	736
29134	29134	1	SNP (transition)	C -> T	AGA -> AAA	R -> K	Substitution	large subunit of ribonucleotide reductase CDS	2135
30411	30411	1	SNP (transition)	C -> T	ATG -> ATA	M -> I	Substitution	large subunit of ribonucleotide reductase CDS	858
30915	30915	1	SNP (transition)	G -> A	CTC -> CTT		None	large subunit of ribonucleotide reductase CDS	354
31502	31501	0	Insertion	G
31620	31620	1	SNP (transition)	G -> A	CCC -> TCC	P -> S	Substitution	capsid protein CDS	1288
31692	31692	1	SNP (transition)	A -> G	TTG -> CTG		None	capsid protein CDS	1216
39824	39824	1	SNP (transition)	T -> C	GTT -> GTC		None	very large tegument protein CDS	3246
44334	44334	1	SNP (transition)	A -> G	AGC -> GGC	S -> G	Substitution	very large tegument protein CDS	7756
44741	44741	1	SNP (transversion)	G -> T	ACG -> ACT		None	very large tegument protein CDS	8163
44872	44873	2	Substitution	CC -> GG	GCC -> GGG	A -> G	Substitution	very large tegument protein CDS	8294
44874	44874	1	SNP (transversion)	C -> G	CCC -> GCC	P -> A	Substitution	very large tegument protein CDS	8296
44880	44880	1	SNP (transition)	G -> A	GCG -> ACG	A -> T	Substitution	very large tegument protein CDS	8302
44885	44885	1	SNP (transversion)	C -> A	GCC -> GCA		None	very large tegument protein CDS	8307
44885	44885	1	SNP (transition)	C -> T	GCC -> GCT		None	very large tegument protein CDS	8307
44886	44887	2	Substitution	CC -> TT	CCG -> TTG	P -> L	Substitution	very large tegument protein CDS	8308
44886	44888	3	Substitution	CCG -> GGC	CCG -> GGC	P -> G	Substitution	very large tegument protein CDS	8308
44891	44891	1	SNP (transition)	C -> T	GCC -> GCT		None	very large tegument protein CDS	8313
44892	44894	3	Substitution	AAA -> GGG	AAA -> GGG	K -> G	Substitution	very large tegument protein CDS	8314
44895	44986	92	Deletion	TCTGCGGCGGCCCCCGCCGCGGCCCCGGCCAAATCTGCGGCGGCCCCCGCCGCGGCCCCGGCCAAATCTGCGGCGGCCCCCGCCGCGGCCCC			Frame Shift	very large tegument protein CDS	8317
44987	44987	1	SNP (transversion)	G -> T	CCG -> CCT		None	very large tegument protein CDS	8409
44988	44988	1	SNP (transversion)	G -> C	GCC -> CCC	A -> P	Substitution	very large tegument protein CDS	8410
45255	45255	1	SNP (transition)	T -> C	TTG -> CTG		None	very large tegument protein CDS	8677
47189	47189	1	SNP (transition)	C -> T	CCG -> CCA		None	capsid protein CDS	57
50586	50586	1	SNP (transversion)	A -> C	AAG -> ACG	K -> T	Substitution	unknown CDS	35
52151	52151	1	SNP (transition)	T -> C	AAG -> GAG	K -> E	Substitution	DNA polymerase CDS	2968
52314	52314	1	SNP (transversion)	C -> A	CTG -> CTT		None	DNA polymerase CDS	2805
54195	54195	1	SNP (transition)	A -> G	TTT -> TTC		None	DNA polymerase CDS	924
55023	55023	1	SNP (transition)	C -> T	CAG -> CAA		None	DNA polymerase CDS	96
55378	55378	1	SNP (transition)	A -> G
55503	55503	1	SNP (transition)	C -> T	GTC -> GTT		None	ssDNA binding protein CDS	117
59301	59301	1	SNP (transition)	T -> C	TTG -> TCG	L -> S	Substitution	DNA packaging protein CDS	125
62709	62709	1	SNP (transition)	A -> G	TCA -> TCG		None	envelope glycoprotein B CDS	1344
63741	63741	1	SNP (transition)	C -> T	TAC -> TAT		None	envelope glycoprotein B CDS	2376
64708	64708	1	SNP (transition)	G -> A	GGT -> GAT	G -> D	Substitution	unknown CDS	197
65174	65174	1	SNP (transition)	C -> T	CAG -> CAA		None	capsid protein CDS	1854
65174	65174	1	SNP (transition)	C -> T	CAG -> CAA		None	major capsid scaffold protein CDS	903
67371	67371	1	SNP (transition)	C -> T	GAG -> GAA		None	unknown CDS	1539
68771	68771	1	SNP (transversion)	G -> T	CGC -> AGC	R -> S	Substitution	unknown CDS	139
70274	70274	1	SNP (transversion)	G -> T	TCG -> TCT		None	thymidine kinase CDS	432
72443	72443	1	SNP (transition)	T -> C	TTA -> TCA	L -> S	Substitution	envelope glycoprotein H CDS	1319
73849	73848	0	Insertion (tandem repeat)	(GCGGGAGCGAGGGCTGCTGCGGCGGCGGCGCG)9 -> (GCGGGAGCGAGGGCTGCTGCGGCGGCGGCGCG)10
73916	73947	32	Deletion (tandem repeat)	(GCGGGAGCGAGGGCTGCTGCGGCGGCGGCGCG)9 -> (GCGGGAGCGAGGGCTGCTGCGGCGGCGGCGCG)8
75571	75571	1	SNP (transition)	T -> C	CAT -> CGT	H -> R	Substitution	tegument protein CDS	587
75660	75660	1	SNP (transition)	A -> G	ACT -> ACC		None	tegument protein CDS	498
76703	76703	1	SNP (transition)	T -> C
77127	77128	2	Substitution	TA -> GG	CTT,AAC -> CTG,GAC	LN -> LD	Substitution	integral membrane protein CDS	402
81459	81459	1	SNP (transition)	G -> A	AGG -> AAG	R -> K	Substitution	major capsid protein CDS	3824
83179	83179	1	SNP (transition)	C -> T	GGC -> AGC	G -> S	Substitution	putative terminase CDS	2107
90132	90132	1	SNP (transversion)	C -> A	CTC -> CTA		None	tegument protein CDS	831
92166	92166	1	SNP (transition)	T -> C	TCG -> CCG	S -> P	Substitution	deoxyribonuclease CDS	1099
95157	95157	1	SNP (transition)	A -> G	ACT -> GCT	T -> A	Substitution	origin binding protein CDS	835
100176	100176	1	SNP (transition)	C -> T	CGA -> CAA	R -> Q	Substitution	minor capsid protein CDS	2147
100176	100176	1	SNP (transition)	C -> T	GAT -> AAT	D -> N	Substitution	unknown CDS	88
100917	100917	1	SNP (transition)	C -> T	AGA -> AAA	R -> K	Substitution	minor capsid protein CDS	1406
103442	103442	1	SNP (transversion)	A -> C	ACA -> ACC		None	component of DNA helicase-primase complex CDS	1137
103958	103958	1	SNP (transition)	G -> A	TCG -> TCA		None	component of DNA helicase-primase complex CDS	1653
107935	107935	1	SNP (transition)	T -> C	GAA -> GAG		None	uracil-DNA glycosylase CDS	141
108991	108991	1	SNP (transition)	A -> G
108992	108992	1	SNP (transversion)	A -> C
109144	109144	1	SNP (transition)	A -> G
109256	109256	1	SNP (transition)	G -> A
109319	109319	1	SNP (transition)	A -> G
109747	109747	1	SNP (transition)	G -> A
109757	109757	1	SNP (transition)	A -> G
110356	110356	1	SNP (transition)	T -> C	CAA -> CAG		None	transcriptional regulator CDS	1596
112353	112354	2	Substitution	CC -> TA
112356	112372	17	Deletion	GCCCTAGCCCCCTGCCC
112375	112376	2	Substitution	GC -> AA
112378	112378	1	SNP (transition)	C -> T
112381	112381	1	SNP (transversion)	T -> A
112383	112392	10	Deletion	CCCTAGCCCC -> TTTAT
112397	112397	1	SNP (transition)	C -> T
112401	112403	3	Deletion	GCC
112484	112483	0	Insertion (tandem repeat)	(C)8 -> (C)9
112794	112794	1	SNP (transversion)	A -> C
112885	112885	1	Deletion (tandem repeat)	(C)7 -> (C)6
112929	112929	1	SNP (transition)	T -> C
112946	112946	1	SNP (transition)	C -> T
113045	113059	15	Deletion (tandem repeat)	(TGACGTAGGCGGTAG)3 -> (TGACGTAGGCGGTAG)2
113139	113487	349	Deletion	-GAGCAGGAAGGGGAGGAGCAGGAAGGGGAGGAGCAGGAAGGGGAGGAGCAGGAAGGGGAGGAGCAGGAAGGGGAGGAGCAGGAAGGGGAGGAGCAGGAAGGGGAGGAGCAGGAAGGGGAGGAGCAGGAAGGGGAGGAGCAGGAAGGGGAGGAGCAGGAAGGGGAGGAGCAGGAAGGGGAGGAGCAGGAAGGGGAGGAGCAGGAAGGGGAGGAGCAGGAACCATCAACCCGCCCATCAACCCGCCCATCAACCCGCCCATCAACCCGCCCATCAACCCGCCCATCAACCCGCCCATCAACCCGCCCATCAACCCGCCCATCAACCCGCCCATCAACCCGCCCATCAACCC
114948	114948	1	SNP (transversion)	T -> G	CGA -> CGC		None	transcriptional regulator CDS	3351
117957	117957	1	SNP (transversion)	G -> T	GCC -> GCA		None	transcriptional regulator CDS	342
118233	118233	1	SNP (transversion)	T -> G	GGA -> GGC		None	transcriptional regulator CDS	66
118737	118737	1	SNP (transition)	T -> C
119503	119503	1	SNP (transition)	G -> A
119951	119967	17	Deletion	CATGCCCCGCCCACGGT
120201	120200	0	Insertion (tandem repeat)	(G)8 -> (G)9
120263	120369	107	Deletion	GGTGGGGGGGGCAAAAATTTTTGAGCGCAACAGATAGCATGGCTGGGTTACGGTATGCGGCTATGGGGGGGGGGGGGCGCTAAAATACGGTTACCCGGCACATACTC
120436	120435	0	Insertion (tandem repeat)	(G)5 -> (G)6
120568	120568	1	SNP (transversion)	C -> A
120987	121081	95	Deletion	CCGGCGACCCCGGCCCAGCCCAGCTCCGGCGACCCCGGCCCAGCCCAGCTCCGGCGACCCCGGCCCAGCCCAGCTCCGGCGACCCCGGCCCAGCC
121082	121157	76	Deletion	ATGCCCCACGGACAGCCGTGCGGGGCGTGCGACGGATCCTGCCGCATGGCCCAGCGGGGGACGCCGTCCACCAGCC	ATG,CCC,CAC,GGA,CAG,CCG,TGC,GGG,GCG,TGC,GAC,GGA,TCC,TGC,CGC,ATG,GCC,CAG,CGG,GGG,ACG,CCG,TCC,ACC,AGC,CCC ->	MPHGQPCGACDGSCRMAQRGTPSTSP ->	Start Codon Loss	putative host range determinant protein CDS	1
121265	121265	1	SNP (transition)	G -> A	GAC -> AAC	D -> N	Substitution	putative host range determinant protein CDS	184
122428	122430	3	Deletion (tandem repeat)	(GGG)3 -> (GGG)2
123452	123452	1	Deletion (tandem repeat)	(G)10 -> (G)9
123548	123548	1	SNP (transition)	G -> A
123570	123590	21	Deletion
123593	123594	2	Substitution	TAGGGGAGGCCGAGCGGGGGA
123596	123596	1	SNP (transversion)	G -> C
123599	123600	2	Substitution	GG -> CT
123603	123611	9	Deletion	AGGCCGAGC
123613	123616	4	Substitution	GGGG -> CAAA
123618	123618	1	SNP (transition)	G -> A
123620	123620	1	SNP (transition)	G -> A
123623	123625	3	Substitution	GTA -> TAG
123629	123629	1	SNP (transition)	G -> A
123890	123890	1	SNP (transition)	A -> G	TTT -> TCT	F -> S	Substitution	IR6 CDS	782
124708	124707	0	Insertion	+C			Frame Shift	ORF68 CDS	1044
124997	124997	1	SNP (transition)	A -> G	TGG -> CGG	W -> R	Substitution	ORF68 CDS	754
124997	124997	1	SNP (transition)	A -> G	TGG -> CGG	W -> R	Substitution	truncated virion membrane protein CDS	754
125032	125032	1	SNP (transversion)	C -> A	CGG -> CTG	R -> L	Substitution	ORF68 CDS	719
125032	125032	1	SNP (transversion)	C -> A	CGG -> CTG	R -> L	Substitution	truncated virion membrane protein CDS	719
125415	125415	1	SNP (transition)	A -> G	CTT -> CTC		None	ORF68 CDS	336
125415	125415	1	SNP (transition)	A -> G	CTT -> CTC		None	truncated virion membrane protein CDS	336
128664	128664	1	SNP (transition)	T -> C	TCT -> TCC		None	envelope glycoprotein CDS	93
129144	129144	1	SNP (transition)	G -> A	ACG -> ACA		None	envelope glycoprotein CDS	573
129159	129159	1	SNP (transition)	G -> A	ACG -> ACA		None	envelope glycoprotein CDS	588
129174	129174	1	SNP (transition)	G -> A	ACG -> ACA		None	envelope glycoprotein CDS	603
129189	129189	1	SNP (transition)	G -> A	ACG -> ACA		None	envelope glycoprotein CDS	618
129195	129195	1	SNP (transversion)	A -> T	GCA -> GCT		None	envelope glycoprotein CDS	624
129204	129204	1	SNP (transversion)	A -> C	ACA -> ACC		None	envelope glycoprotein CDS	633
129207	129207	1	SNP (transition)	A -> G	GCA -> GCG		None	envelope glycoprotein CDS	636
129325	129327	2	Substitution	ACC -> GCA	ACC -> GCA	T -> A	Substitution	envelope glycoprotein CDS	754
129348	129348	1	SNP (transition)	T -> C	ACT -> ACC		None	envelope glycoprotein CDS	777
132326	132326	1	SNP (transition)	C -> T	GTC -> GTT		None	envelope glycoprotein D CDS	1062
132945	132945	1	SNP (transition)	T -> C	GTC -> GCC	V -> A	Substitution	envelope glycoprotein I CDS	365
137171	137171	1	SNP (transition)	G -> A
137285	137285	1	SNP (transversion)	G -> T
137320	137320	1	SNP (transition)	T -> C
137610	137609	0	Insertion	G
138427	138427	1	SNP (transition)	T -> C	TTT -> TCT	F -> S	Substitution	IR6 CDS	782
138702	138738	37	Deletion	CCCCGCTCGGCCTCCCCTACCGCTCTCCCCCGCTCGG
138769	138769	1	SNP (transition)	C -> T
138856	138856	1	Deletion (tandem repeat)	(C)10 -> (C)9
139881	139883	3	Deletion (tandem repeat)	(CCC)3 -> (CCC)2
141052	141052	1	SNP (transition)	C -> T	GAC -> AAC	D -> N	Substitution	putative host range determinant protein CDS	184
141154	141235	82	Deletion	TGAGGGGGCTGGTGGACGGCGTCCCCCGCTGGGCCATGCGGCAGGATCCGTCGCACGCCCCGCACGGCTGTCCGTGGGGCAT	ATG,CCC,CAC,GGA,CAG,CCG,TGC,GGG,GCG,TGC,GAC,GGA,TCC,TGC,CGC,ATG,GCC,CAG,CGG,GGG,ACG,CCG,TCC,ACC,AGC,CCC,CTC,ATC ->	MPHGQPCGACDGSCRMAQRGTPSTSPLI ->	Start Codon Loss	putative host range determinant protein CDS	1
141236	141326	91	Deletion	GGCTGGGCCGGGGTCGCCGGAGCTGGGCTGGGCCGGGGTCGCCGGAGCTGGGCTGGGCCGGGGTCGCCGGAGCTGGGCTGGGCCGGGGTCG
141432	141438	7	Deletion (tandem repeat)	(CCGACCA)10 -> (CCGACCA)9
141749	141749	1	SNP (transversion)	G -> T
141877	141876	0	Insertion (tandem repeat)	(C)5 -> (C)6
141974	141974	1	SNP (transversion)	A -> C
141975	141975	1	SNP (transversion)	G -> T
141976	141976	1	SNP (transversion)	C -> A
141978	142051	74	Deletion	CCCCCCCCCCCCCATAGCCGCATACCGTAACCCAGCCATGCTATCTGTTGCGCTCAAAAATTTTTGCCCCCCCC
142109	142108	0	Insertion (tandem repeat)	(C)8 -> (C)9
142363	142410	48	Deletion	CATGGGGGGGGTGTGGACGTGGGTGGAAGGTGGGTACCGGGCATCTCC
142814	142814	1	SNP (transition)	C -> T
143580	143580	1	SNP (transition)	A -> G
144084	144084	1	SNP (transversion)	A -> C	GGA -> GGC		None	transcriptional regulator CDS	66
144360	144360	1	SNP (transversion)	C -> A	GCC -> GCA		None	transcriptional regulator CDS	342
147369	147369	1	SNP (transversion)	A -> C	CGA -> CGC		None	transcriptional regulator CDS	3351
148759	149211	453	Deletion	-TGTTTTTAATAAAGTTTTTTTTAAATTTTGATTGACCGCGTGGTCTTTGTTTACTGGGCGGGTTGATGGGCGGGTTGATGGGCGGGTTGATGGGCGGGTTGATGGGCGGGTTGATGGGCGGGTTGATGGGCGGGTTGATGGGCGGGTTGATGGGCGGGTTGATGGGCGGGTTGATGGGCGGGTTGATGGGCGGGTTGATGGTTCCTGCTCCTCCCCTTCCTGCTCCTCCCCTTCCTGCTCCTCCCCTTCCTGCTCCTCCCCTTCCTGCTCCTCCCCTTCCTGCTCCTCCCCTTCCTGCTCCTCCCCTTCCTGCTCCTCCCCTTCCTGCTCCTCCCCTTCCTGCTCCTCCCCTTCCTGCTCCTCCCCTTCCTGCTCCTCCCCTTCCTGCTCCTCCCCTT…
149220	149234	15	Deletion (tandem repeat)	(CTACGTCACTACCGC)3 -> (CTACGTCACTACCGC)2
149371	149371	1	SNP (transition)	G -> A

## Sheet: ST10-LS113812
Minimum	Maximum	Length	Polymorphism Type	Change	Codon Change	Amino Acid Change	Protein Effect	CDS	CDS Position
138	171	34	Deletion (tandem repeat)	(AGGCCACGCCCACTGGG)12 -> (AGGCCACGCCCACTGGG)10
233	232	0	Insertion (tandem repeat)	(AGGCCACGCCCACTGGG)12 -> (AGGCCACGCCCACTGGG)14
440	439	0	Insertion (tandem repeat)	(TGGGGCTCACTGCTATGC)19 -> (TGGGGCTCACTGCTATGC)20
469	486	18	Deletion (tandem repeat)	(TGGGGCTCACTGCTATGC)19 -> (TGGGGCTCACTGCTATGC)18
507	507	1	SNP (transition)	T -> C
508	509	2	Substitution	GC -> AG
1225	1225	1	SNP (transition)	T -> C
2162	2162	1	SNP (transition)	T -> C	CTA -> CTG		None	unknown CDS	384
2175	2175	1	SNP (transversion)	G -> T	GCT -> GAT	A -> D	Substitution	unknown CDS	371
5517	5517	1	SNP (transversion)	A -> C	GTC -> GGC	V -> G	Substitution	unknown CDS	341
5893	5892	0	Insertion (tandem repeat)	(TG)2 -> (TG)3
5898	5898	1	SNP (transition)	C -> T
6142	6142	1	SNP (transition)	C -> T	AAG -> AAA		None	glycoprotein K CDS	882
6330	6330	1	SNP (transition)	A -> G	TTG -> CTG		None	glycoprotein K CDS	694
10620	10620	1	SNP (transition)	A -> G	AAC -> GAC	N -> D	Substitution	unknown CDS	340
11158	11158	1	SNP (transition)	G -> A	TCC -> TCT		None	deoxyuridine triphosphatase CDS	939
13094	13094	1	SNP (transversion)	A -> C	AAG -> CAG	K -> Q	Substitution	tegument protein CDS	565
15178	15178	1	SNP (transversion)	C -> G
15383	15383	1	SNP (transversion)	C -> A	CGC -> CGA		None	tegument protein CDS	84
16213	16213	1	SNP (transition)	T -> C	TTA -> TCA	L -> S	Substitution	tegument protein CDS	914
16677	16677	1	SNP (transition)	A -> G	ACC -> GCC	T -> A	Substitution	tegument protein CDS	1378
20643	20643	1	SNP (transition)	T -> C	AAT -> GAT	N -> D	Substitution	tegument/envelope protein CDS	496
21491	21491	1	SNP (transition)	A -> G	GTT -> GTC		None	glycoprotein C CDS	1353
21592	21592	1	SNP (transition)	C -> T	GAC -> AAC	D -> N	Substitution	glycoprotein C CDS	1252
23249	23249	1	SNP (transition)	A -> G	ATT -> ATC		None	putative integral membrane protein CDS	978
27362	27362	1	SNP (transition)	C -> T	TCT -> TTT	S -> F	Substitution	tegument protein CDS	1109
28116	28116	1	SNP (transition)	A -> G	TTG -> CTG		None	small subunit of ribonucleotide reductase CDS	736
31502	31501	0	Insertion	G
31620	31620	1	SNP (transition)	G -> A	CCC -> TCC	P -> S	Substitution	capsid protein CDS	1288
31692	31692	1	SNP (transition)	A -> G	TTG -> CTG		None	capsid protein CDS	1216
33717	33717	1	SNP (transition)	C -> T	GTC -> GTT		None	tegument protein CDS	435
36880	36880	1	SNP (transversion)	A -> C	AAC -> ACC	N -> T	Substitution	very large tegument protein CDS	302
39071	39071	1	SNP (transition)	T -> C	ATT -> ATC		None	very large tegument protein CDS	2493
44334	44334	1	SNP (transition)	A -> G	AGC -> GGC	S -> G	Substitution	very large tegument protein CDS	7756
44872	44873	2	Substitution	CC -> GG	GCC -> GGG	A -> G	Substitution	very large tegument protein CDS	8294
44873	44873	1	SNP (transition)	C -> T	GCC -> GCT		None	very large tegument protein CDS	8295
44874	44875	2	Substitution	CC -> GT	CCC -> GTC	P -> V	Substitution	very large tegument protein CDS	8296
44877	44877	1	SNP (transversion)	G -> T	GCC -> TCC	A -> S	Substitution	very large tegument protein CDS	8299
44879	44879	1	SNP (transition)	C -> T	GCC -> GCT		None	very large tegument protein CDS	8301
44880	44880	1	SNP (transition)	G -> A	GCG -> ACG	A -> T	Substitution	very large tegument protein CDS	8302
44885	44888	4	Substitution	CCCG -> AGGC	GCC,CCG -> GCA,GGC	AP -> AG	Substitution	very large tegument protein CDS	8307
44889	44891	2	Substitution	GCC -> CCT	GCC -> CCT	A -> P	Substitution	very large tegument protein CDS	8311
44889	44889	1	SNP (transversion)	G -> T	GCC -> TCC	A -> S	Substitution	very large tegument protein CDS	8311
44890	44890	1	SNP (transition)	C -> T	GCC -> GTC	A -> V	Substitution	very large tegument protein CDS	8312
44892	44893	2	Substitution	AA -> GG	AAA -> GGA	K -> G	Substitution	very large tegument protein CDS	8314
44893	44893	1	SNP (transversion)	A -> T	AAA -> ATA	K -> I	Substitution	very large tegument protein CDS	8315
44894	44895	2	Substitution	AT -> GC	AAA,TCT -> AAG,CCT	KS -> KP	Substitution	very large tegument protein CDS	8316
44896	44897	2	Substitution	CT -> AC	TCT -> TAC	S -> Y	Substitution	very large tegument protein CDS	8318
44897	44897	1	SNP (transversion)	T -> G	TCT -> TCG		None	very large tegument protein CDS	8319
44898	44899	2	Substitution	GC -> AG	GCG -> AGG	A -> R	Substitution	very large tegument protein CDS	8320
44901	44930	30	Deletion	GCGGCCCCCGCCGCGGCCCCGGCCAAATCT	GCG,GCC,CCC,GCC,GCG,GCC,CCG,GCC,AAA,TCT ->	AAPAAAPAKS ->	Deletion	very large tegument protein CDS	8323
44932	44933	2	Substitution	CG -> AC	GCG -> GAC	A -> D	Substitution	very large tegument protein CDS	8354
44933	44933	1	SNP (transversion)	G -> T	GCG -> GCT		None	very large tegument protein CDS	8355
44934	44935	2	Substitution	GC -> AA	GCG -> AAG	A -> K	Substitution	very large tegument protein CDS	8356
44934	44935	2	Substitution	GC -> TT	GCG -> TTG	A -> L	Substitution	very large tegument protein CDS	8356
44938	44938	1	SNP (transversion)	C -> A	GCC -> GAC	A -> D	Substitution	very large tegument protein CDS	8360
44940	44941	2	Substitution	CC -> GA	CCC -> GAC	P -> D	Substitution	very large tegument protein CDS	8362
44941	44941	1	SNP (transversion)	C -> G	CCC -> CGC	P -> R	Substitution	very large tegument protein CDS	8363
44942	44942	1	SNP (transversion)	C -> G	CCC -> CCG		None	very large tegument protein CDS	8364
44946	44947	2	Substitution	GC -> AA	GCG -> AAG	A -> K	Substitution	very large tegument protein CDS	8368
44950	44950	1	SNP (transversion)	C -> A	GCC -> GAC	A -> D	Substitution	very large tegument protein CDS	8372
44953	44953	1	SNP (transversion)	C -> A	CCG -> CAG	P -> Q	Substitution	very large tegument protein CDS	8375
44996	44996	1	SNP (transition)	T -> C	TCT -> TCC		None	very large tegument protein CDS	8418
44997	44999	2	Substitution	GCG -> CCA	GCG -> CCA	A -> P	Substitution	very large tegument protein CDS	8419
45002	45002	1	SNP (transition)	G -> A	GCG -> GCA		None	very large tegument protein CDS	8424
45005	45005	1	SNP (transversion)	C -> A	GCC -> GCA		None	very large tegument protein CDS	8427
45006	45008	2	Substitution	CCC -> GCA	CCC -> GCA	P -> A	Substitution	very large tegument protein CDS	8428
45014	45014	1	SNP (transition)	G -> A	GCG -> GCA		None	very large tegument protein CDS	8436
45016	45017	2	Substitution	CC -> AA	GCC -> GAA	A -> E	Substitution	very large tegument protein CDS	8438
45020	45020	1	SNP (transversion)	G -> T	CCG -> CCT		None	very large tegument protein CDS	8442
45021	45021	1	SNP (transversion)	G -> C	GCC -> CCC	A -> P	Substitution	very large tegument protein CDS	8443
45028	45028	1	SNP (transversion)	A -> C	GAC -> GCC	D -> A	Substitution	very large tegument protein CDS	8450
45030	45032	3	Substitution	CAA -> GGC	CAA -> GGC	Q -> G	Substitution	very large tegument protein CDS	8452
45033	45034	2	Substitution	AC -> CA	ACA -> CAA	T -> Q	Substitution	very large tegument protein CDS	8455
45036	45036	1	SNP (transition)	A -> G	AAA -> GAA	K -> E	Substitution	very large tegument protein CDS	8458
45039	45039	1	SNP (transition)	T -> C	TCA -> CCA	S -> P	Substitution	very large tegument protein CDS	8461
45043	45044	2	Substitution	CT -> GC	GCT -> GGC	A -> G	Substitution	very large tegument protein CDS	8465
45046	45047	2	Substitution	CT -> AA	GCT -> GAA	A -> E	Substitution	very large tegument protein CDS	8468
45049	45049	1	SNP (transition)	A -> G	GAA -> GGA	E -> G	Substitution	very large tegument protein CDS	8471
45052	45052	1	SNP (transition)	T -> C	GTC -> GCC	V -> A	Substitution	very large tegument protein CDS	8474
45255	45255	1	SNP (transition)	T -> C	TTG -> CTG		None	very large tegument protein CDS	8677
45288	45288	1	SNP (transition)	A -> G	AAA -> GAA	K -> E	Substitution	very large tegument protein CDS	8710
45293	45293	1	SNP (transversion)	C -> A	AAC -> AAA	N -> K	Substitution	very large tegument protein CDS	8715
45296	45296	1	SNP (transition)	T -> C	ACT -> ACC		None	very large tegument protein CDS	8718
45299	45299	1	SNP (transition)	C -> T	CCC -> CCT		None	very large tegument protein CDS	8721
45302	45302	1	SNP (transition)	A -> G	CTA -> CTG		None	very large tegument protein CDS	8724
45305	45305	1	SNP (transition)	A -> G	CCA -> CCG		None	very large tegument protein CDS	8727
45319	45319	1	SNP (transition)	C -> T	ACT -> ATT	T -> I	Substitution	very large tegument protein CDS	8741
45873	45873	1	SNP (transition)	G -> A	GCC -> ACC	A -> T	Substitution	very large tegument protein CDS	9295
50586	50586	1	SNP (transversion)	A -> C	AAG -> ACG	K -> T	Substitution	unknown CDS	35
52151	52151	1	SNP (transition)	T -> C	AAG -> GAG	K -> E	Substitution	DNA polymerase CDS	2968
54195	54195	1	SNP (transition)	A -> G	TTT -> TTC		None	DNA polymerase CDS	924
55378	55378	1	SNP (transition)	A -> G
55655	55655	1	SNP (transition)	G -> A	AGC -> AAC	S -> N	Substitution	ssDNA binding protein CDS	269
56499	56499	1	SNP (transition)	A -> G	AGA -> AGG		None	ssDNA binding protein CDS	1113
59301	59301	1	SNP (transition)	T -> C	TTG -> TCG	L -> S	Substitution	DNA packaging protein CDS	125
59440	59440	1	SNP (transition)	A -> G	CTA -> CTG		None	DNA packaging protein CDS	264
60943	60943	1	SNP (transition)	C -> T	ATC -> ATT		None	DNA packaging protein CDS	1767
61408	61408	1	SNP (transversion)	C -> A	GCC -> GCA		None	DNA packaging protein CDS	2232
61408	61408	1	SNP (transversion)	C -> A	CAT -> AAT	H -> N	Substitution	envelope glycoprotein B CDS	43
62709	62709	1	SNP (transition)	A -> G	TCA -> TCG		None	envelope glycoprotein B CDS	1344
64291	64291	1	SNP (transition)	G -> A	GAT -> AAT	D -> N	Substitution	envelope glycoprotein B CDS	2926
64708	64708	1	SNP (transition)	G -> A	GGT -> GAT	G -> D	Substitution	unknown CDS	197
68771	68771	1	SNP (transversion)	G -> T	CGC -> AGC	R -> S	Substitution	unknown CDS	139
68977	68976	0	Insertion (tandem repeat)	(A)6 -> (A)7
69037	69037	1	SNP (transition)	A -> G	GTG -> GCG	V -> A	Substitution	unknown CDS	794
70208	70208	1	SNP (transition)	T -> C	GGT -> GGC		None	thymidine kinase CDS	366
70274	70274	1	SNP (transversion)	G -> T	TCG -> TCT		None	thymidine kinase CDS	432
72443	72443	1	SNP (transition)	T -> C	TTA -> TCA	L -> S	Substitution	envelope glycoprotein H CDS	1319
72693	72693	1	SNP (transversion)	C -> A	CCC -> CCA		None	envelope glycoprotein H CDS	1569
75571	75571	1	SNP (transition)	T -> C	CAT -> CGT	H -> R	Substitution	tegument protein CDS	587
75660	75660	1	SNP (transition)	A -> G	ACT -> ACC		None	tegument protein CDS	498
76548	76548	1	SNP (transition)	G -> A
76703	76703	1	SNP (transition)	T -> C
77037	77037	1	SNP (transition)	C -> T	GCC -> GCT		None	integral membrane protein CDS	312
77127	77127	1	SNP (transversion)	T -> G	CTT -> CTG		None	integral membrane protein CDS	402
78331	78331	1	SNP (transversion)	C -> A	CTC -> CTA		None	major capsid protein CDS	696
79075	79075	1	SNP (transition)	T -> C	CAT -> CAC		None	major capsid protein CDS	1440
81459	81459	1	SNP (transition)	G -> A	AGG -> AAG	R -> K	Substitution	major capsid protein CDS	3824
81976	81975	0	Insertion (tandem repeat)	(G)7 -> (G)8
84086	84086	1	SNP (transition)	T -> C	CTA -> CTG		None	putative terminase CDS	1200
84775	84775	1	SNP (transition)	C -> T	GAC -> GAT		None	putative product ORF45 CDS	363
85692	85692	1	SNP (transition)	G -> A	GGA -> GAA	G -> E	Substitution	putative product ORF45 CDS	1280
86971	86971	1	SNP (transition)	C -> T	TCT -> TTT	S -> F	Substitution	tegument protein CDS	419
86975	86975	1	SNP (transition)	C -> T	ATC -> ATT		None	tegument protein CDS	423
92166	92166	1	SNP (transition)	T -> C	TCG -> CCG	S -> P	Substitution	deoxyribonuclease CDS	1099
93249	93249	1	SNP (transition)	A -> G	GTC -> GCC	V -> A	Substitution	envelope glycoprotein M CDS	1157
99519	99519	1	SNP (transition)	G -> A	CTA -> TTA		None	unknown CDS	745
103442	103442	1	SNP (transversion)	A -> C	ACA -> ACC		None	component of DNA helicase-primase complex CDS	1137
104716	104716	1	SNP (transition)	G -> A	AGG -> AAG	R -> K	Substitution	component of DNA helicase-primase complex CDS	2411
107929	107929	1	SNP (transition)	C -> T	GGG -> GGA		None	uracil-DNA glycosylase CDS	147
107935	107935	1	SNP (transition)	T -> C	GAA -> GAG		None	uracil-DNA glycosylase CDS	141
109144	109144	1	SNP (transition)	A -> G
109256	109256	1	SNP (transition)	G -> A
109319	109319	1	SNP (transition)	A -> G
109747	109747	1	SNP (transition)	G -> A
109757	109757	1	SNP (transition)	A -> G
112352	112355	4	Substitution	CCCT -> AGGG
112357	112374	18	Deletion	CCCTAGCCCCCTGCCCTA
112376	112379	4	Substitution	CCCC -> GATG
112381	112381	1	SNP (transition)	T -> C
112384	112385	2	Substitution	CC -> TA
112387	112389	3	Substitution	AGC -> TTA
112392	112392	1	SNP (transversion)	C -> A
112394	112395	2	Substitution	TG -> CA
112397	112397	1	SNP (transversion)	C -> A
112399	112401	3	Substitution	TAG -> CCC
112407	112407	1	SNP (transversion)	T -> G
112484	112483	0	Insertion (tandem repeat)	(C)8 -> (C)9
112937	112936	0	Insertion (tandem repeat)	(GG)4 -> (GG)5
112946	112946	1	SNP (transition)	C -> T
112970	113474	505	Deletion	CGTCACCGGAAGGGGCGTGGCCGGAAGCGGAAGGGGAGGAGTCAATGACGTCACCGGAAGGGGAGGAGCAGGAAATGACGTAGGCGGTAGTGACGTAGGCGGTAGTGACGTAGGCGGTAGTGACGTAGCGGAAGGGGAGGAGCAGGAAGGGGAGGAGCAGGAAGGGGAGGAGCAGGAAGGGGAGGAGCAGGAAGGGGAGGAGCAGGAAGGGGAGGAGCAGGAAGGGGAGGAGCAGGAAGGGGAGGAGCAGGAAGGGGAGGAGCAGGAAGGGGAGGAGCAGGAAGGGGAGGAGCAGGAAGGGGAGGAGCAGGAAGGGGAGGAGCAGGAAGGGGAGGAGCAGGAAGGGGAGGAGCAGGAAGGGGAGGAGCAGGAAGGGGAGGAGCAGGAACCATCAACCCG…
114948	114948	1	SNP (transversion)	T -> G	CGA -> CGC		None	transcriptional regulator CDS	3351
116357	116357	1	SNP (transversion)	A -> T	TCC -> ACC	S -> T	Substitution	transcriptional regulator CDS	1942
118233	118233	1	SNP (transversion)	T -> G	GGA -> GGC		None	transcriptional regulator CDS	66
118510	118510	1	SNP (transition)	C -> T
118738	118738	1	SNP (transition)	T -> C
119909	119952	44	Deletion	AGATGCCCGGTACCCACCTTCCACCCACGTCCACACCCCCCCCA
119967	119966	0	Insertion (tandem repeat)	(T)7 -> (T)8
120256	120404	149	Deletion	TATTGAGGGTGGGGGGGGCAAAAATTTTTGAGCGCAACAGATAGCATGGCTGGGTTACGGTATGCGGCTATGGGGGGGGGGGGGCGCTAAAATACGGTTACCCGGCACATACTCTCGTCGAGGTATGGGCCGGGTCACGGTACCCACTA
120436	120435	0	Insertion (tandem repeat)	(G)5 -> (G)6
120988	121033	46	Deletion	CGGCGACCCCGGCCCAGCCCAGCTCCGGCGACCCCGGCCCAGCCCA
121123	121169	47	Deletion	CCGCATGGCCCAGCGGGGGACGCCGTCCACCAGCCCCCTCATCCCGT			Frame Shift	putative host range determinant protein CDS	42
122276	122278	3	Deletion (tandem repeat)	(GTT)4 -> (GTT)3
122415	122440	26	Deletion	GGAAGGGTGGGGTGGGGGGGGGAGGA
123060	123060	1	SNP (transition)	C -> T	TGC -> TGT		None	virion protein CDS	480
123452	123452	1	Deletion (tandem repeat)	(G)10 -> (G)9
123548	123548	1	SNP (transition)	G -> A
123577	123578	2	Substitution	GG -> AA
123580	123582	3	Substitution	CGA -> GCC
123585	123585	1	SNP (transversion)	G -> C
123586	123586	1	SNP (transversion)	G -> C
123587	123597	11	Deletion	GGGAGAGCGGT
123598	123598	1	SNP (transition)	A -> G
123599	123599	1	SNP (transversion)	G -> C
123600	123600	1	SNP (transition)	G -> A
123600	123600	1	SNP (transversion)	G -> C
123602	123602	1	SNP (transition)	G -> A
123603	123603	1	SNP (transversion)	A -> C
123603	123603	1	SNP (transition)	A -> G
123604	123604	1	SNP (transversion)	G -> T
123605	123605	1	SNP (transition)	G -> A
123606	123606	1	SNP (transversion)	C -> G
123607	123607	1	SNP (transition)	C -> T
123608	123608	1	SNP (transition)	G -> A
123609	123609	1	SNP (transversion)	A -> C
123609	123609	1	SNP (transversion)	A -> T
123611	123611	1	SNP (transversion)	C -> G
123611	123611	1	SNP (transition)	C -> T
123614	123614	1	SNP (transversion)	G -> C
123614	123614	1	SNP (transversion)	G -> T
123890	123890	1	SNP (transition)	A -> G	TTT -> TCT	F -> S	Substitution	IR6 CDS	782
124708	124707	0	Insertion	C			Frame Shift	ORF68 CDS	1044
124997	124997	1	SNP (transition)	A -> G	TGG -> CGG	W -> R	Substitution	ORF68 CDS	754
124997	124997	1	SNP (transition)	A -> G	TGG -> CGG	W -> R	Substitution	truncated virion membrane protein CDS	754
125122	125122	1	SNP (transition)	T -> C	CAT -> CGT	H -> R	Substitution	ORF68 CDS	629
125122	125122	1	SNP (transition)	T -> C	CAT -> CGT	H -> R	Substitution	truncated virion membrane protein CDS	629
125415	125415	1	SNP (transition)	A -> G	CTT -> CTC		None	ORF68 CDS	336
125415	125415	1	SNP (transition)	A -> G	CTT -> CTC		None	truncated virion membrane protein CDS	336
127563	127563	1	SNP (transition)	T -> C	ATT -> ATC		None	envelope glycoprotein G CDS	408
129144	129144	1	SNP (transition)	G -> A	ACG -> ACA		None	envelope glycoprotein CDS	573
129159	129159	1	SNP (transition)	G -> A	ACG -> ACA		None	envelope glycoprotein CDS	588
129174	129174	1	SNP (transition)	G -> A	ACG -> ACA		None	envelope glycoprotein CDS	603
129189	129189	1	SNP (transition)	G -> A	ACG -> ACA		None	envelope glycoprotein CDS	618
129325	129327	2	Substitution	ACC -> GCA	ACC -> GCA	T -> A	Substitution	envelope glycoprotein CDS	754
129335	129334	0	Insertion	CGGCTACCACCACCG	GCG -> GCG,GCT,ACC,ACC,ACC,GCG	A -> AATTTA	Insertion	envelope glycoprotein CDS	764
129348	129348	1	SNP (transition)	T -> C	ACT -> ACC		None	envelope glycoprotein CDS	777
129420	129434	15	Deletion (tandem repeat)	(GCGGCTACCACCACC)13 -> (GCGGCTACCACCACC)12	ACC,ACC,GCG,GCT,ACC,ACC -> ACC	TTAATT -> T	Deletion	envelope glycoprotein CDS	849
132945	132945	1	SNP (transition)	T -> C	GTC -> GCC	V -> A	Substitution	envelope glycoprotein I CDS	365
133440	133440	1	SNP (transition)	C -> T	ACA -> ATA	T -> I	Substitution	envelope glycoprotein I CDS	860
137195	137195	1	SNP (transition)	A -> G
137320	137320	1	SNP (transition)	T -> C
137610	137609	0	Insertion	G
138427	138427	1	SNP (transition)	T -> C	TTT -> TCT	F -> S	Substitution	IR6 CDS	782
138707	138748	42	Deletion	CTCGGCCTCCCCTACCGCTCTCCCCCGCTCGGCCTCCCCTAC
138769	138769	1	SNP (transition)	C -> T
138820	138861	42	Deletion	ACTACCACAACCACCTCACCCACCAATCCCTACCATCCCCCC
139257	139257	1	SNP (transition)	G -> A	TGC -> TGT		None	virion protein CDS	480
139875	139892	18	Deletion	CCTCCTCCCCCCCCCACC
140030	140032	3	Deletion (tandem repeat)	(AAC)4 -> (AAC)3
141155	141161	7	Deletion	GAGGGGG			Frame Shift	putative host range determinant protein CDS	75
141187	141217	31	Deletion	CCATGCGGCAGGATCCGTCGCACGCCCCGCA			Frame Shift	putative host range determinant protein CDS	19
141271	141271	1	SNP (transversion)	G -> C
141272	141272	1	SNP (transversion)	G -> T
141276	141276	1	SNP (transversion)	G -> C
141277	141277	1	SNP (transversion)	C -> G
141278	141278	1	SNP (transition)	C -> T
141281	141281	1	SNP (transition)	A -> G
141284	141285	2	Substitution	TG -> AT
141878	141877	0	Insertion (tandem repeat)	(C)5 -> (C)6
141978	141979	2	Deletion (tandem repeat)	(CC)6 -> (CC)5
142000	142000	1	SNP (transition)	T -> C
142011	142015	5	Deletion	AGCCA
142041	142054	14	Deletion	TTGCCCCCCCCACC
142333	142417	85	Deletion	GGTCGGCTCTCAAAAAAACCGTGGGCGGGGCATGGGGGGGGTGTGGACGTGGGTGGAAGGTGGGTACCGGGCATCTCCCCCCACA
143579	143579	1	SNP (transition)	A -> G
143807	143807	1	SNP (transition)	G -> A
144084	144084	1	SNP (transversion)	A -> C	GGA -> GGC		None	transcriptional regulator CDS	66
145960	145960	1	SNP (transversion)	T -> A	TCC -> ACC	S -> T	Substitution	transcriptional regulator CDS	1942
147369	147369	1	SNP (transversion)	A -> C	CGA -> CGC		None	transcriptional regulator CDS	3351

## Sheet: ST11-LS119764
Minimum	Maximum	Length	Polymorphism Type	Change	Codon Change	Amino Acid Change	Protein Effect	CDS	CDS Position
429	446	18	Deletion (tandem repeat)	(TGGGGCTCACTGCTATGC)19 -> (TGGGGCTCACTGCTATGC)18
679	678	0	Insertion (tandem repeat)	(TGGGGCTCACTGCTATGC)19 -> (TGGGGCTCACTGCTATGC)20
2096	2096	1	SNP (transition)	G -> A	TTC -> TTT		None	unknown CDS	450
5893	5892	0	Insertion (tandem repeat)	(TG)2 -> (TG)3
5898	5898	1	SNP (transition)	C -> T
6142	6142	1	SNP (transition)	C -> T	AAG -> AAA		None	glycoprotein K CDS	882
6330	6330	1	SNP (transition)	A -> G	TTG -> CTG		None	glycoprotein K CDS	694
8280	8280	1	SNP (transversion)	A -> C	CTC -> CGC	L -> R	Substitution	primase CDS	2003
10620	10620	1	SNP (transition)	A -> G	AAC -> GAC	N -> D	Substitution	unknown CDS	340
11158	11158	1	SNP (transition)	G -> A	TCC -> TCT		None	deoxyuridine triphosphatase CDS	939
13094	13094	1	SNP (transversion)	A -> C	AAG -> CAG	K -> Q	Substitution	tegument protein CDS	565
15178	15178	1	SNP (transversion)	C -> G
15383	15383	1	SNP (transversion)	C -> A	CGC -> CGA		None	tegument protein CDS	84
19862	19862	1	SNP (transition)	C -> T	GTC -> GTT		None	tegument protein CDS	1797
21073	21073	1	SNP (transition)	T -> C	CCA -> CCG		None	tegument/envelope protein CDS	66
21509	21509	1	SNP (transition)	G -> A	GTC -> GTT		None	glycoprotein C CDS	1335
22682	22682	1	SNP (transversion)	G -> T	GGC -> GGA		None	glycoprotein C CDS	162
27686	27686	1	SNP (transition)	A -> G	GAT -> GGT	D -> G	Substitution	tegument protein CDS	1433
28116	28116	1	SNP (transition)	A -> G	TTG -> CTG		None	small subunit of ribonucleotide reductase CDS	736
29134	29134	1	SNP (transition)	C -> T	AGA -> AAA	R -> K	Substitution	large subunit of ribonucleotide reductase CDS	2135
30411	30411	1	SNP (transition)	C -> T	ATG -> ATA	M -> I	Substitution	large subunit of ribonucleotide reductase CDS	858
30915	30915	1	SNP (transition)	G -> A	CTC -> CTT		None	large subunit of ribonucleotide reductase CDS	354
31502	31501	0	Insertion	G
31620	31620	1	SNP (transition)	G -> A	CCC -> TCC	P -> S	Substitution	capsid protein CDS	1288
31692	31692	1	SNP (transition)	A -> G	TTG -> CTG		None	capsid protein CDS	1216
39824	39824	1	SNP (transition)	T -> C	GTT -> GTC		None	very large tegument protein CDS	3246
44334	44334	1	SNP (transition)	A -> G	AGC -> GGC	S -> G	Substitution	very large tegument protein CDS	7756
44741	44741	1	SNP (transversion)	G -> T	ACG -> ACT		None	very large tegument protein CDS	8163
44872	44875	4	Substitution	CCCC -> GGGT	GCC,CCC -> GGG,GTC	AP -> GV	Substitution	very large tegument protein CDS	8294
44877	44880	3	Substitution	GCCG -> TCTA	GCC,GCG -> TCT,ACG	AA -> ST	Substitution	very large tegument protein CDS	8299
44885	44897	13	Substitution	CCCGGCCAAATCT -> AGGCTTTGGGGGC	GCC,CCG,GCC,AAA,TCT -> GCA,GGC,TTT,GGG,GGC	APAKS -> AGFGG	Substitution	very large tegument protein CDS	8307
44927	44945	19	Deletion	ATCTGCGGCGGCCCCCGCC			Frame Shift	very large tegument protein CDS	8349
44947	44947	1	SNP (transversion)	C -> G	GCG -> GGG	A -> G	Substitution	very large tegument protein CDS	8369
44949	44951	2	Substitution	GCC -> CCG	GCC -> CCG	A -> P	Substitution	very large tegument protein CDS	8371
44971	44972	2	Substitution	CC -> GG	GCC -> GGG	A -> G	Substitution	very large tegument protein CDS	8393
44973	44973	1	SNP (transversion)	C -> G	CCC -> GCC	P -> A	Substitution	very large tegument protein CDS	8395
45255	45255	1	SNP (transition)	T -> C	TTG -> CTG		None	very large tegument protein CDS	8677
47189	47189	1	SNP (transition)	C -> T	CCG -> CCA		None	capsid protein CDS	57
50586	50586	1	SNP (transversion)	A -> C	AAG -> ACG	K -> T	Substitution	unknown CDS	35
52151	52151	1	SNP (transition)	T -> C	AAG -> GAG	K -> E	Substitution	DNA polymerase CDS	2968
52314	52314	1	SNP (transversion)	C -> A	CTG -> CTT		None	DNA polymerase CDS	2805
54195	54195	1	SNP (transition)	A -> G	TTT -> TTC		None	DNA polymerase CDS	924
55023	55023	1	SNP (transition)	C -> T	CAG -> CAA		None	DNA polymerase CDS	96
55378	55378	1	SNP (transition)	A -> G
55503	55503	1	SNP (transition)	C -> T	GTC -> GTT		None	ssDNA binding protein CDS	117
59301	59301	1	SNP (transition)	T -> C	TTG -> TCG	L -> S	Substitution	DNA packaging protein CDS	125
62709	62709	1	SNP (transition)	A -> G	TCA -> TCG		None	envelope glycoprotein B CDS	1344
63741	63741	1	SNP (transition)	C -> T	TAC -> TAT		None	envelope glycoprotein B CDS	2376
64708	64708	1	SNP (transition)	G -> A	GGT -> GAT	G -> D	Substitution	unknown CDS	197
65174	65174	1	SNP (transition)	C -> T	CAG -> CAA		None	capsid protein CDS	1854
65174	65174	1	SNP (transition)	C -> T	CAG -> CAA		None	major capsid scaffold protein CDS	903
67371	67371	1	SNP (transition)	C -> T	GAG -> GAA		None	unknown CDS	1539
68771	68771	1	SNP (transversion)	G -> T	CGC -> AGC	R -> S	Substitution	unknown CDS	139
70274	70274	1	SNP (transversion)	G -> T	TCG -> TCT		None	thymidine kinase CDS	432
72443	72443	1	SNP (transition)	T -> C	TTA -> TCA	L -> S	Substitution	envelope glycoprotein H CDS	1319
73879	73974	96	Deletion (tandem repeat)	(GCGGGAGCGAGGGCTGCTGCGGCGGCGGCGCG)9 -> (GCGGGAGCGAGGGCTGCTGCGGCGGCGGCGCG)6
74007	74006	0	Insertion (tandem repeat)	(GCGGGAGCGAGGGCTGCTGCGGCGGCGGCGCG)9 -> (GCGGGAGCGAGGGCTGCTGCGGCGGCGGCGCG)12
75571	75571	1	SNP (transition)	T -> C	CAT -> CGT	H -> R	Substitution	tegument protein CDS	587
75660	75660	1	SNP (transition)	A -> G	ACT -> ACC		None	tegument protein CDS	498
76703	76703	1	SNP (transition)	T -> C
77127	77128	2	Substitution	TA -> GG	CTT,AAC -> CTG,GAC	LN -> LD	Substitution	integral membrane protein CDS	402
81459	81459	1	SNP (transition)	G -> A	AGG -> AAG	R -> K	Substitution	major capsid protein CDS	3824
83179	83179	1	SNP (transition)	C -> T	GGC -> AGC	G -> S	Substitution	putative terminase CDS	2107
90132	90132	1	SNP (transversion)	C -> A	CTC -> CTA		None	tegument protein CDS	831
92166	92166	1	SNP (transition)	T -> C	TCG -> CCG	S -> P	Substitution	deoxyribonuclease CDS	1099
95157	95157	1	SNP (transition)	A -> G	ACT -> GCT	T -> A	Substitution	origin binding protein CDS	835
100176	100176	1	SNP (transition)	C -> T	CGA -> CAA	R -> Q	Substitution	minor capsid protein CDS	2147
100176	100176	1	SNP (transition)	C -> T	GAT -> AAT	D -> N	Substitution	unknown CDS	88
100917	100917	1	SNP (transition)	C -> T	AGA -> AAA	R -> K	Substitution	minor capsid protein CDS	1406
103442	103442	1	SNP (transversion)	A -> C	ACA -> ACC		None	component of DNA helicase-primase complex CDS	1137
103958	103958	1	SNP (transition)	G -> A	TCG -> TCA		None	component of DNA helicase-primase complex CDS	1653
107840	107840	1	SNP (transition)	G -> A	ACG -> ATG	T -> M	Substitution	uracil-DNA glycosylase CDS	236
107853	107853	1	SNP (transition)	G -> A	CAC -> TAC	H -> Y	Substitution	uracil-DNA glycosylase CDS	223
107935	107935	1	SNP (transition)	T -> C	GAA -> GAG		None	uracil-DNA glycosylase CDS	141
108847	108847	1	SNP (transition)	G -> A
109144	109144	1	SNP (transition)	A -> G
109256	109256	1	SNP (transition)	G -> A
109319	109319	1	SNP (transition)	A -> G
109747	109747	1	SNP (transition)	G -> A
109757	109757	1	SNP (transition)	A -> G
110356	110356	1	SNP (transition)	T -> C	CAA -> CAG		None	transcriptional regulator CDS	1596
112352	112395	44	Deletion	CCCTGCCCTAGCCCCCTGCCCTAGCCCCCTGCCCTAGCCCCCTG
112484	112483	0	Insertion (tandem repeat)	(CC)4 -> (CC)5
112794	112794	1	SNP (transversion)	A -> C
112885	112885	1	Deletion (tandem repeat)	(C)7 -> (C)6
112929	112929	1	SNP (transition)	T -> C
112946	112946	1	SNP (transition)	C -> T
113049	113063	15	Deletion (tandem repeat)	(TGACGTAGGCGGTAG)3 -> (TGACGTAGGCGGTAG)2
113153	113464	312	Deletion	GGAGCAGGAAGGGGAGGAGCAGGAAGGGGAGGAGCAGGAAGGGGAGGAGCAGGAAGGGGAGGAGCAGGAAGGGGAGGAGCAGGAAGGGGAGGAGCAGGAAGGGGAGGAGCAGGAAGGGGAGGAGCAGGAAGGGGAGGAGCAGGAAGGGGAGGAGCAGGAAGGGGAGGAGCAGGAAGGGGAGGAGCAGGAAGGGGAGGAGCAGGAACCATCAACCCGCCCATCAACCCGCCCATCAACCCGCCCATCAACCCGCCCATCAACCCGCCCATCAACCCGCCCATCAACCCGCCCATCAACCCGCCCATCAACCCG
114948	114948	1	SNP (transversion)	T -> G	CGA -> CGC		None	transcriptional regulator CDS	3351
117957	117957	1	SNP (transversion)	G -> T	GCC -> GCA		None	transcriptional regulator CDS	342
118233	118233	1	SNP (transversion)	T -> G	GGA -> GGC		None	transcriptional regulator CDS	66
118737	118737	1	SNP (transition)	T -> C
119503	119503	1	SNP (transition)	G -> A
119927	119935	9	Deletion	TTCCACCCA
120201	120200	0	Insertion (tandem repeat)	(G)8 -> (G)9
120265	120301	37	Deletion	TGGGGGGGGCAAAAATTTTTGAGCGCAACAGATAGCA
120327	120331	5	Deletion	GGGGG
120436	120435	0	Insertion (tandem repeat)	(G)5 -> (G)6
120568	120568	1	SNP (transversion)	C -> A
120982	120982	1	SNP (transversion)	C -> A
120983	120983	1	SNP (transversion)	A -> T
120986	120986	1	SNP (transition)	T -> C
120989	120991	3	Substitution	GGC -> ACG
121018	121081	64	Deletion	ACCCCGGCCCAGCCCAGCTCCGGCGACCCCGGCCCAGCCCAGCTCCGGCGACCCCGGCCCAGCC
121082	121093	12	Deletion	ATGCCCCACGGA	ATG,CCC,CAC,GGA ->	MPHG ->	Start Codon Loss	putative host range determinant protein CDS	1
121094	121095	2	Substitution	CA -> AT	CAG -> ATG	Q -> M	Substitution	putative host range determinant protein CDS	13
121107	121161	55	Deletion	CGTGCGACGGATCCTGCCGCATGGCCCAGCGGGGGACGCCGTCCACCAGCCCCCT			Frame Shift	putative host range determinant protein CDS	26
121265	121265	1	SNP (transition)	G -> A	GAC -> AAC	D -> N	Substitution	putative host range determinant protein CDS	184
122422	122444	23	Deletion	TGGGGTGGGGGGGGGAGGAGGAA
123452	123452	1	Deletion (tandem repeat)	(G)10 -> (G)9
123548	123548	1	SNP (transition)	G -> A
123569	123621	53	Deletion	GTAGGGGAGGCCGAGCGGGGGAGAGCGGTAGGGGAGGCCGAGCGGGGGAGAGC
123890	123890	1	SNP (transition)	A -> G	TTT -> TCT	F -> S	Substitution	IR6 CDS	782
124708	124707	0	Insertion	C			Frame Shift	ORF68 CDS	1044
124997	124997	1	SNP (transition)	A -> G	TGG -> CGG	W -> R	Substitution	ORF68 CDS	754
124997	124997	1	SNP (transition)	A -> G	TGG -> CGG	W -> R	Substitution	truncated virion membrane protein CDS	754
125032	125032	1	SNP (transversion)	C -> A	CGG -> CTG	R -> L	Substitution	ORF68 CDS	719
125032	125032	1	SNP (transversion)	C -> A	CGG -> CTG	R -> L	Substitution	truncated virion membrane protein CDS	719
125415	125415	1	SNP (transition)	A -> G	CTT -> CTC		None	ORF68 CDS	336
125415	125415	1	SNP (transition)	A -> G	CTT -> CTC		None	truncated virion membrane protein CDS	336
128664	128664	1	SNP (transition)	T -> C	TCT -> TCC		None	envelope glycoprotein CDS	93
129144	129144	1	SNP (transition)	G -> A	ACG -> ACA		None	envelope glycoprotein CDS	573
129159	129159	1	SNP (transition)	G -> A	ACG -> ACA		None	envelope glycoprotein CDS	588
129174	129174	1	SNP (transition)	G -> A	ACG -> ACA		None	envelope glycoprotein CDS	603
129189	129189	1	SNP (transversion)	G -> C	ACG -> ACC		None	envelope glycoprotein CDS	618
129192	129192	1	SNP (transition)	A -> G	GCA -> GCG		None	envelope glycoprotein CDS	621
129195	129195	1	SNP (transversion)	A -> T	GCA -> GCT		None	envelope glycoprotein CDS	624
129198	129198	1	SNP (transversion)	G -> T	ACG -> ACT		None	envelope glycoprotein CDS	627
129201	129201	1	SNP (transversion)	C -> A	ACC -> ACA		None	envelope glycoprotein CDS	630
129201	129201	1	SNP (transition)	C -> T	ACC -> ACT		None	envelope glycoprotein CDS	630
129202	129204	2	Substitution	ACA -> TCC	ACA -> TCC	T -> S	Substitution	envelope glycoprotein CDS	631
129205	129205	1	SNP (transition)	G -> A	GCA -> ACA	A -> T	Substitution	envelope glycoprotein CDS	634
129205	129205	1	SNP (transversion)	G -> T	GCA -> TCA	A -> S	Substitution	envelope glycoprotein CDS	634
129207	129207	1	SNP (transversion)	A -> T	GCA -> GCT		None	envelope glycoprotein CDS	636
129209	129210	2	Substitution	CA -> AT	GCA -> GAT	A -> D	Substitution	envelope glycoprotein CDS	638
129213	129213	1	SNP (transversion)	G -> C	ACG -> ACC		None	envelope glycoprotein CDS	642
129325	129327	2	Substitution	ACC -> GCA	ACC -> GCA	T -> A	Substitution	envelope glycoprotein CDS	754
129348	129348	1	SNP (transition)	T -> C	ACT -> ACC		None	envelope glycoprotein CDS	777
132326	132326	1	SNP (transition)	C -> T	GTC -> GTT		None	envelope glycoprotein D CDS	1062
132945	132945	1	SNP (transition)	T -> C	GTC -> GCC	V -> A	Substitution	envelope glycoprotein I CDS	365
137171	137171	1	SNP (transition)	G -> A
137285	137285	1	SNP (transversion)	G -> T
137320	137320	1	SNP (transition)	T -> C
137610	137609	0	Insertion	G
138427	138427	1	SNP (transition)	T -> C	TTT -> TCT	F -> S	Substitution	IR6 CDS	782
138703	138764	62	Deletion	CCCGCTCGGCCTCCCCTACCGCTCTCCCCCGCTCGGCCTCCCCTACCGCTCTCCCCCGCTCG
138769	138769	1	SNP (transition)	C -> T
138856	138856	1	Deletion (tandem repeat)	(C)10 -> (C)9
139881	139883	3	Deletion (tandem repeat)	(CCC)3 -> (CCC)2
141052	141052	1	SNP (transition)	C -> T	GAC -> AAC	D -> N	Substitution	putative host range determinant protein CDS	184
141749	141749	1	SNP (transversion)	G -> T
141877	141876	0	Insertion (tandem repeat)	(C)5 -> (C)6
141978	141982	5	Deletion	CCCCC
142026	142054	29	Deletion	TGCGCTCAAAAATTTTTGCCCCCCCCACC
142109	142108	0	Insertion (tandem repeat)	(C)8 -> (C)9
142374	142376	3	Deletion	TGT
142814	142814	1	SNP (transition)	C -> T
143580	143580	1	SNP (transition)	A -> G
144084	144084	1	SNP (transversion)	A -> C	GGA -> GGC		None	transcriptional regulator CDS	66
144360	144360	1	SNP (transversion)	C -> A	GCC -> GCA		None	transcriptional regulator CDS	342
147369	147369	1	SNP (transversion)	A -> C	CGA -> CGC		None	transcriptional regulator CDS	3351
148811	149184	374	Deletion	ACTGGGCGGGTTGATGGGCGGGTTGATGGGCGGGTTGATGGGCGGGTTGATGGGCGGGTTGATGGGCGGGTTGATGGGCGGGTTGATGGGCGGGTTGATGGGCGGGTTGATGGGCGGGTTGATGGGCGGGTTGATGGGCGGGTTGATGGTTCCTGCTCCTCCCCTTCCTGCTCCTCCCCTTCCTGCTCCTCCCCTTCCTGCTCCTCCCCTTCCTGCTCCTCCCCTTCCTGCTCCTCCCCTTCCTGCTCCTCCCCTTCCTGCTCCTCCCCTTCCTGCTCCTCCCCTTCCTGCTCCTCCCCTTCCTGCTCCTCCCCTTCCTGCTCCTCCCCTTCCTGCTCCTCCCCTTCCTGCTCCTCCCCTTCCTGCTCCTCCCC
149220	149234	15	Deletion (tandem repeat)	(CTACGTCACTACCGC)3 -> (CTACGTCACTACCGC)2
149371	149371	1	SNP (transition)	G -> A

## Sheet: ST12-LS130922
Minimum	Maximum	Length	Polymorphism Type	Change	Codon Change	Amino Acid Change	Protein Effect	CDS	CDS Position
422	421	0	Insertion	GGGCTCACTGCTATGCTGGGGCTCACTGCTATGCTGGGGCTCACTGCTATGCTGGGGCTCACTGCTATGCTGGGGCTCACTGCTATGCTGGGCCCCTTGTTTGTTC
422	421	0	Insertion	A
422	421	0	Insertion (tandem repeat)	(G)4 -> (G)5
422	421	0	Insertion (tandem repeat)	(G)4 -> (G)5
422	421	0	Insertion	A
422	421	0	Insertion	C
422	421	0	Insertion	GCC
422	421	0	Insertion	C
422	421	0	Insertion (tandem repeat)	(G)4 -> (G)5
422	421	0	Insertion	A
422	421	0	Insertion	T
422	421	0	Insertion	A
422	421	0	Insertion	T
422	421	0	Insertion	A
422	421	0	Insertion	T
422	421	0	Insertion	A
422	421	0	Insertion	T
422	421	0	Insertion	C
422	421	0	Insertion (tandem repeat)	(G)4 -> (G)5
422	421	0	Insertion	C
422	421	0	Insertion (tandem repeat)	(G)4 -> (G)5
422	421	0	Insertion	T
422	421	0	Insertion	ATTGTCCTCTCAGCGCTACAGTGGGGCTCACTGCTATGCTGGGGCTCACTGCTATGCTGGGGCTCACTGCTATGCTG
432	629	198	Deletion (tandem repeat)	(TGGGGCTCACTGCTATGC)19 -> (TGGGGCTCACTGCTATGC)8
2785	2785	1	SNP (transition)	G -> A
4093	4093	1	SNP (transition)	G -> A	CCT -> CTT	P -> L	Substitution	unknown CDS	140
5320	5320	1	SNP (transition)	G -> A	CAC -> TAC	H -> Y	Substitution	unknown CDS	538
5475	5475	1	SNP (transition)	G -> A	TCA -> TTA	S -> L	Substitution	unknown CDS	383
5517	5517	1	SNP (transversion)	A -> C	GTC -> GGC	V -> G	Substitution	unknown CDS	341
5895	5894	0	Insertion (tandem repeat)	(TG)2 -> (TG)3
5898	5898	1	SNP (transition)	C -> T
6142	6142	1	SNP (transition)	C -> T	AAG -> AAA		None	glycoprotein K CDS	882
6330	6330	1	SNP (transition)	A -> G	TTG -> CTG		None	glycoprotein K CDS	694
6460	6460	1	SNP (transition)	G -> A	TGC -> TGT		None	glycoprotein K CDS	564
7589	7589	1	SNP (transition)	C -> T	TCG -> TCA		None	primase CDS	2694
7964	7964	1	SNP (transition)	T -> C	CCA -> CCG		None	primase CDS	2319
10620	10620	1	SNP (transition)	A -> G	AAC -> GAC	N -> D	Substitution	unknown CDS	340
11158	11158	1	SNP (transition)	G -> A	TCC -> TCT		None	deoxyuridine triphosphatase CDS	939
12685	12685	1	SNP (transition)	T -> C	AGT -> AGC		None	tegument protein CDS	156
13094	13094	1	SNP (transversion)	A -> C	AAG -> CAG	K -> Q	Substitution	tegument protein CDS	565
13233	13233	1	SNP (transversion)	G -> T	AGG -> ATG	R -> M	Substitution	tegument protein CDS	704
15178	15178	1	SNP (transversion)	C -> G
15383	15383	1	SNP (transversion)	C -> A	CGC -> CGA		None	tegument protein CDS	84
16213	16213	1	SNP (transition)	T -> C	TTA -> TCA	L -> S	Substitution	tegument protein CDS	914
18042	18042	1	SNP (transition)	G -> A
19948	19948	1	SNP (transition)	G -> A	AGA -> AAA	R -> K	Substitution	tegument protein CDS	1883
20140	20140	1	SNP (transition)	G -> A	AGC -> AAC	S -> N	Substitution	tegument protein CDS	2075
21491	21491	1	SNP (transition)	A -> G	GTT -> GTC		None	glycoprotein C CDS	1353
23120	23120	1	SNP (transversion)	C -> A	ACG -> ACT		None	putative integral membrane protein CDS	1107
23249	23249	1	SNP (transition)	A -> G	ATT -> ATC		None	putative integral membrane protein CDS	978
27335	27335	1	SNP (transition)	G -> A	TGT -> TAT	C -> Y	Substitution	tegument protein CDS	1082
28116	28116	1	SNP (transition)	A -> G	TTG -> CTG		None	small subunit of ribonucleotide reductase CDS	736
29202	29202	1	SNP (transition)	C -> T	GGG -> GGA		None	large subunit of ribonucleotide reductase CDS	2067
31502	31501	0	Insertion	G
31620	31620	1	SNP (transition)	G -> A	CCC -> TCC	P -> S	Substitution	capsid protein CDS	1288
31692	31692	1	SNP (transition)	A -> G	TTG -> CTG		None	capsid protein CDS	1216
32347	32347	1	SNP (transversion)	A -> C	TTT -> TTG	F -> L	Substitution	capsid protein CDS	561
36072	36072	1	SNP (transversion)	G -> T	CGG -> CGT		None	tegument protein CDS	2790
36575	36575	1	SNP (transition)	G -> A
38102	38102	1	SNP (transition)	G -> A	TCG -> TCA		None	very large tegument protein CDS	1524
39071	39071	1	SNP (transition)	T -> C	ATT -> ATC		None	very large tegument protein CDS	2493
41473	41473	1	SNP (transition)	A -> G	GAG -> GGG	E -> G	Substitution	very large tegument protein CDS	4895
41761	41761	1	SNP (transition)	C -> T	ACG -> ATG	T -> M	Substitution	very large tegument protein CDS	5183
43570	43570	1	SNP (transversion)	T -> A	ATA -> AAA	I -> K	Substitution	very large tegument protein CDS	6992
44334	44334	1	SNP (transition)	A -> G	AGC -> GGC	S -> G	Substitution	very large tegument protein CDS	7756
44872	44874	3	Substitution	CCC -> GGG	GCC,CCC -> GGG,GCC	AP -> GA	Substitution	very large tegument protein CDS	8294
44875	44875	1	SNP (transition)	C -> T	CCC -> CTC	P -> L	Substitution	very large tegument protein CDS	8297
44877	44879	2	Substitution	GCC -> TCT	GCC -> TCT	A -> S	Substitution	very large tegument protein CDS	8299
44880	44880	1	SNP (transition)	G -> A	GCG -> ACG	A -> T	Substitution	very large tegument protein CDS	8302
44885	44885	1	SNP (transversion)	C -> A	GCC -> GCA		None	very large tegument protein CDS	8307
44885	44885	1	SNP (transition)	C -> T	GCC -> GCT		None	very large tegument protein CDS	8307
44886	44887	2	Substitution	CC -> TT	CCG -> TTG	P -> L	Substitution	very large tegument protein CDS	8308
44886	44888	3	Substitution	CCG -> GGC	CCG -> GGC	P -> G	Substitution	very large tegument protein CDS	8308
44889	44891	3	Substitution	GCC -> TTT	GCC -> TTT	A -> F	Substitution	very large tegument protein CDS	8311
44892	44897	5	Substitution	AAATCT -> GGGGCC	AAA,TCT -> GGG,GCC	KS -> GA	Substitution	very large tegument protein CDS	8314
44902	44902	1	SNP (transition)	C -> T	GCG -> GTG	A -> V	Substitution	very large tegument protein CDS	8324
44905	44906	2	Substitution	CC -> TT	GCC -> GTT	A -> V	Substitution	very large tegument protein CDS	8327
44907	44907	1	SNP (transversion)	C -> G	CCC -> GCC	P -> A	Substitution	very large tegument protein CDS	8329
44915	44915	1	SNP (transition)	G -> A	GCG -> GCA		None	very large tegument protein CDS	8337
44915	44915	1	SNP (transversion)	G -> C	GCG -> GCC		None	very large tegument protein CDS	8337
44918	44918	1	SNP (transversion)	C -> G	GCC -> GCG		None	very large tegument protein CDS	8340
44919	44919	1	SNP (transition)	C -> T	CCG -> TCG	P -> S	Substitution	very large tegument protein CDS	8341
44920	44920	1	SNP (transition)	C -> T	CCG -> CTG	P -> L	Substitution	very large tegument protein CDS	8342
44937	44937	1	SNP (transition)	G -> A	GCC -> ACC	A -> T	Substitution	very large tegument protein CDS	8359
44961	44963	2	Substitution	TCT -> GCC	TCT -> GCC	S -> A	Substitution	very large tegument protein CDS	8383
44966	44966	1	SNP (transition)	G -> A	GCG -> GCA		None	very large tegument protein CDS	8388
44972	44972	1	SNP (transition)	C -> T	GCC -> GCT		None	very large tegument protein CDS	8394
44973	44973	1	SNP (transversion)	C -> A	CCC -> ACC	P -> T	Substitution	very large tegument protein CDS	8395
44980	44980	1	SNP (transversion)	C -> G	GCG -> GGG	A -> G	Substitution	very large tegument protein CDS	8402
45190	45190	1	SNP (transversion)	A -> C	AAG -> ACG	K -> T	Substitution	very large tegument protein CDS	8612
45255	45255	1	SNP (transition)	T -> C	TTG -> CTG		None	very large tegument protein CDS	8677
45288	45288	1	SNP (transition)	A -> G	AAA -> GAA	K -> E	Substitution	very large tegument protein CDS	8710
46711	46711	1	SNP (transition)	C -> T	GCA -> GTA	A -> V	Substitution	very large tegument protein CDS	10133
46793	46793	1	SNP (transition)	C -> T
47189	47189	1	SNP (transition)	C -> T	CCG -> CCA		None	capsid protein CDS	57
49657	49657	1	SNP (transition)	C -> T	CTG -> TTG		None	DNA packaging protein CDS	961
50586	50586	1	SNP (transversion)	A -> C	AAG -> ACG	K -> T	Substitution	unknown CDS	35
52151	52151	1	SNP (transition)	T -> C	AAG -> GAG	K -> E	Substitution	DNA polymerase CDS	2968
52245	52245	1	SNP (transition)	C -> T	CTG -> CTA		None	DNA polymerase CDS	2874
54195	54195	1	SNP (transition)	A -> G	TTT -> TTC		None	DNA polymerase CDS	924
55023	55023	1	SNP (transition)	C -> T	CAG -> CAA		None	DNA polymerase CDS	96
55378	55378	1	SNP (transition)	A -> G
59301	59301	1	SNP (transition)	T -> C	TTG -> TCG	L -> S	Substitution	DNA packaging protein CDS	125
59867	59867	1	SNP (transversion)	C -> A	CGG -> AGG		None	DNA packaging protein CDS	691
59983	59983	1	SNP (transition)	C -> T	GCC -> GCT		None	DNA packaging protein CDS	807
62709	62709	1	SNP (transition)	A -> G	TCA -> TCG		None	envelope glycoprotein B CDS	1344
64708	64708	1	SNP (transition)	G -> A	GGT -> GAT	G -> D	Substitution	unknown CDS	197
65174	65174	1	SNP (transition)	C -> T	CAG -> CAA		None	capsid protein CDS	1854
65174	65174	1	SNP (transition)	C -> T	CAG -> CAA		None	major capsid scaffold protein CDS	903
67371	67371	1	SNP (transition)	C -> T	GAG -> GAA		None	unknown CDS	1539
68197	68197	1	SNP (transition)	A -> G	GTG -> GCG	V -> A	Substitution	unknown CDS	713
68771	68771	1	SNP (transversion)	G -> T	CGC -> AGC	R -> S	Substitution	unknown CDS	139
70250	70250	1	SNP (transition)	T -> C	GTT -> GTC		None	thymidine kinase CDS	408
70274	70274	1	SNP (transversion)	G -> T	TCG -> TCT		None	thymidine kinase CDS	432
70876	70876	1	SNP (transition)	C -> T	ACC -> ATC	T -> I	Substitution	thymidine kinase CDS	1034
72443	72443	1	SNP (transition)	T -> C	TTA -> TCA	L -> S	Substitution	envelope glycoprotein H CDS	1319
75571	75571	1	SNP (transition)	T -> C	CAT -> CGT	H -> R	Substitution	tegument protein CDS	587
75660	75660	1	SNP (transition)	A -> G	ACT -> ACC		None	tegument protein CDS	498
76703	76703	1	SNP (transition)	T -> C
77127	77128	2	Substitution	TA -> GG	CTT,AAC -> CTG,GAC	LN -> LD	Substitution	integral membrane protein CDS	402
80575	80575	1	SNP (transition)	C -> T	GTC -> GTT		None	major capsid protein CDS	2940
80863	80863	1	SNP (transition)	C -> T	GGC -> GGT		None	major capsid protein CDS	3228
81459	81459	1	SNP (transition)	G -> A	AGG -> AAG	R -> K	Substitution	major capsid protein CDS	3824
82354	82354	1	SNP (transition)	G -> A	GTG -> GTA		None	capsid protein CDS	339
89910	89910	1	SNP (transversion)	A -> C	AAA -> AAC	K -> N	Substitution	tegument protein CDS	609
90132	90132	1	SNP (transversion)	C -> A	CTC -> CTA		None	tegument protein CDS	831
92166	92166	1	SNP (transition)	T -> C	TCG -> CCG	S -> P	Substitution	deoxyribonuclease CDS	1099
99763	99763	1	SNP (transition)	A -> G	TTT -> TTC		None	unknown CDS	501
100176	100176	1	SNP (transition)	C -> T	GAT -> AAT	D -> N	Substitution	unknown CDS	88
100176	100176	1	SNP (transition)	C -> T	CGA -> CAA	R -> Q	Substitution	minor capsid protein CDS	2147
100917	100917	1	SNP (transition)	C -> T	AGA -> AAA	R -> K	Substitution	minor capsid protein CDS	1406
103442	103442	1	SNP (transversion)	A -> C	ACA -> ACC		None	component of DNA helicase-primase complex CDS	1137
105543	105543	1	SNP (transversion)	G -> T	GAG -> GAT	E -> D	Substitution	unknown CDS	543
107935	107935	1	SNP (transition)	T -> C	GAA -> GAG		None	uracil-DNA glycosylase CDS	141
108776	108776	1	SNP (transition)	C -> T
109144	109144	1	SNP (transition)	A -> G
109256	109256	1	SNP (transition)	G -> A
109319	109319	1	SNP (transition)	A -> G
109747	109747	1	SNP (transition)	G -> A
109757	109757	1	SNP (transition)	A -> G
110356	110356	1	SNP (transition)	T -> C	CAA -> CAG		None	transcriptional regulator CDS	1596
112352	112407	56	Deletion	CCCTGCCCTAGCCCCCTGCCCTAGCCCCCTGCCCTAGCCCCCTGCCCTAGCCCCCT
112484	112483	0	Insertion (tandem repeat)	(C)8 -> (C)9
112794	112794	1	SNP (transversion)	A -> C
112929	112929	1	SNP (transition)	T -> C
112937	112936	0	Insertion (tandem repeat)	(G)9 -> (G)10
112946	112946	1	SNP (transition)	C -> T
113098	113099	2	Substitution	CG -> GC
113101	113103	3	Substitution	AAG -> GTA
113105	113105	1	SNP (transversion)	G -> T
113108	113108	1	SNP (transversion)	G -> C
113110	113113	4	Substitution	AGCA -> TAGC
113161	113503	343	Deletion	AAGGGGAGGAGCAGGAAGGGGAGGAGCAGGAAGGGGAGGAGCAGGAAGGGGAGGAGCAGGAAGGGGAGGAGCAGGAAGGGGAGGAGCAGGAAGGGGAGGAGCAGGAAGGGGAGGAGCAGGAAGGGGAGGAGCAGGAAGGGGAGGAGCAGGAAGGGGAGGAGCAGGAAGGGGAGGAGCAGGAAGGGGAGGAGCAGGAACCATCAACCCGCCCATCAACCCGCCCATCAACCCGCCCATCAACCCGCCCATCAACCCGCCCATCAACCCGCCCATCAACCCGCCCATCAACCCGCCCATCAACCCGCCCATCAACCCGCCCATCAACCCGCCCATCAACCCGCCC
114948	114948	1	SNP (transversion)	T -> G	CGA -> CGC		None	transcriptional regulator CDS	3351
117957	117957	1	SNP (transversion)	G -> T	GCC -> GCA		None	transcriptional regulator CDS	342
118233	118233	1	SNP (transversion)	T -> G	GGA -> GGC		None	transcriptional regulator CDS	66
118737	118737	1	SNP (transition)	T -> C
119503	119503	1	SNP (transition)	G -> A
120151	120150	0	Insertion (tandem repeat)	(TT)4 -> (TT)5
120265	120301	37	Deletion	TGGGGGGGGCAAAAATTTTTGAGCGCAACAGATAGCA
120327	120330	4	Deletion (tandem repeat)	(GG)6 -> (GG)4
120436	120435	0	Insertion (tandem repeat)	(G)5 -> (G)6
121028	121028	1	SNP (transition)	A -> G
121265	121265	1	SNP (transition)	G -> A	GAC -> AAC	D -> N	Substitution	putative host range determinant protein CDS	184
121455	121455	1	SNP (transition)	G -> A	AGG -> AAG	R -> K	Substitution	putative host range determinant protein CDS	374
122428	122429	2	Deletion (tandem repeat)	(GG)4 -> (GG)3
123548	123548	1	SNP (transition)	G -> A
123567	123567	1	SNP (transition)	C -> T
123571	123571	1	SNP (transversion)	A -> T
123573	123573	1	SNP (transversion)	G -> T
123576	123577	2	Substitution	AG -> TA
123579	123579	1	SNP (transition)	C -> T
123581	123585	5	Substitution	GAGCG -> ATTGT
123587	123587	1	SNP (transition)	G -> A
123589	123589	1	SNP (transversion)	G -> T
123591	123591	1	SNP (transition)	G -> A
123593	123593	1	SNP (transversion)	G -> C
123595	123600	6	Substitution	GGTAGG -> AACGCA
123602	123604	3	Substitution	GAG -> ACT
123607	123609	3	Insertion	CGA -> TACT
123611	123611	1	SNP (transversion)	C -> G
123613	123616	4	Substitution	GGGG -> CAAA
123618	123618	1	SNP (transition)	G -> A
123620	123620	1	SNP (transition)	G -> A
123622	123625	4	Substitution	GGTA -> AAAG
123629	123629	1	SNP (transition)	G -> A
123890	123890	1	SNP (transition)	A -> G	TTT -> TCT	F -> S	Substitution	IR6 CDS	782
124708	124707	0	Insertion	C			Frame Shift	ORF68 CDS	1044
124997	124997	1	SNP (transition)	A -> G	TGG -> CGG	W -> R	Substitution	ORF68 CDS	754
124997	124997	1	SNP (transition)	A -> G	TGG -> CGG	W -> R	Substitution	truncated virion membrane protein CDS	754
125032	125032	1	SNP (transversion)	C -> A	CGG -> CTG	R -> L	Substitution	ORF68 CDS	719
125032	125032	1	SNP (transversion)	C -> A	CGG -> CTG	R -> L	Substitution	truncated virion membrane protein CDS	719
125415	125415	1	SNP (transition)	A -> G	CTT -> CTC		None	ORF68 CDS	336
125415	125415	1	SNP (transition)	A -> G	CTT -> CTC		None	truncated virion membrane protein CDS	336
126908	126908	1	SNP (transition)	C -> T	CCC -> CCT		None	serine-threonine protein kinase CDS	1023
129144	129144	1	SNP (transition)	G -> A	ACG -> ACA		None	envelope glycoprotein CDS	573
129159	129159	1	SNP (transition)	G -> A	ACG -> ACA		None	envelope glycoprotein CDS	588
129174	129174	1	SNP (transition)	G -> A	ACG -> ACA		None	envelope glycoprotein CDS	603
129189	129189	1	SNP (transition)	G -> A	ACG -> ACA		None	envelope glycoprotein CDS	618
129325	129327	2	Substitution	ACC -> GCA	ACC -> GCA	T -> A	Substitution	envelope glycoprotein CDS	754
129335	129334	0	Insertion	CGGCTACCACCACCG	GCG -> GCG,GCT,ACC,ACC,ACC,GCG	A -> AATTTA	Insertion	envelope glycoprotein CDS	764
129348	129348	1	SNP (transition)	T -> C	ACT -> ACC		None	envelope glycoprotein CDS	777
129420	129434	15	Deletion (tandem repeat)	(GCGGCTACCACCACC)13 -> (GCGGCTACCACCACC)12	ACC,ACC,GCG,GCT,ACC,ACC -> ACC	TTAATT -> T	Deletion	envelope glycoprotein CDS	849
132326	132326	1	SNP (transition)	C -> T	GTC -> GTT		None	envelope glycoprotein D CDS	1062
132945	132945	1	SNP (transition)	T -> C	GTC -> GCC	V -> A	Substitution	envelope glycoprotein I CDS	365
134576	134576	1	SNP (transition)	C -> T	GTC -> GTT		None	envelope glycoprotein E CDS	489
135462	135462	1	SNP (transition)	G -> A	GAC -> AAC	D -> N	Substitution	envelope glycoprotein E CDS	1375
137285	137285	1	SNP (transversion)	G -> T
137320	137320	1	SNP (transition)	T -> C
137610	137609	0	Insertion	G
138427	138427	1	SNP (transition)	T -> C	TTT -> TCT	F -> S	Substitution	IR6 CDS	782
138688	138688	1	SNP (transition)	C -> T
138691	138706	16	Deletion	CTACCGCTCTCCCCCG
138708	138708	1	SNP (transition)	T -> C
138710	138710	1	SNP (transversion)	G -> T
138769	138769	1	SNP (transition)	C -> T
139881	139883	3	Deletion (tandem repeat)	(CCC)3 -> (CCC)2
140862	140862	1	SNP (transition)	C -> T	AGG -> AAG	R -> K	Substitution	putative host range determinant protein CDS	374
141052	141052	1	SNP (transition)	C -> T	GAC -> AAC	D -> N	Substitution	putative host range determinant protein CDS	184
141183	141235	53	Deletion	TGGGCCATGCGGCAGGATCCGTCGCACGCCCCGCACGGCTGTCCGTGGGGCAT	ATG,CCC,CAC,GGA,CAG,CCG,TGC,GGG,GCG,TGC,GAC,GGA,TCC,TGC,CGC,ATG,GCC,CAG ->	MPHGQPCGACDGSCRMAQ ->	Start Codon Loss	putative host range determinant protein CDS	1
141236	141289	54	Deletion	GGCTGGGCCGGGGTCGCCGGAGCTGGGCTGGGCCGGGGTCGCCGGAGCTGGGCT
141877	141876	0	Insertion (tandem repeat)	(C)5 -> (C)6
141978	141981	4	Deletion (tandem repeat)	(CC)6 -> (CC)4
142028	142051	24	Deletion	CGCTCAAAAATTTTTGCCCCCCCC
142159	142158	0	Insertion (tandem repeat)	(AA)4 -> (AA)5
142814	142814	1	SNP (transition)	C -> T
143580	143580	1	SNP (transition)	A -> G
144084	144084	1	SNP (transversion)	A -> C	GGA -> GGC		None	transcriptional regulator CDS	66
144360	144360	1	SNP (transversion)	C -> A	GCC -> GCA		None	transcriptional regulator CDS	342
147369	147369	1	SNP (transversion)	A -> C	CGA -> CGC		None	transcriptional regulator CDS	3351
148816	148816	1	SNP (transversion)	G -> T
148818	148892	75	Deletion	GGGTTGATGGGCGGGTTGATGGGCGGGTTGATGGGCGGGTTGATGGGCGGGTTGATGGGCGGGTTGATGGGCGGG
148895	148896	2	Substitution	GA -> TG
148898	148900	3	Substitution	GGG -> TTA
148902	148902	1	SNP (transversion)	G -> T
148906	148908	3	Substitution	TGA -> CTT
148910	148926	17	Deletion	GGGCGGGTTGATGGGCG
148928	148928	1	SNP (transversion)	G -> T
148931	148932	2	Substitution	GA -> AC
148952	149073	122	Deletion	GTTGATGGTTCCTGCTCCTCCCCTTCCTGCTCCTCCCCTTCCTGCTCCTCCCCTTCCTGCTCCTCCCCTTCCTGCTCCTCCCCTTCCTGCTCCTCCCCTTCCTGCTCCTCCCCTTCCTGCTC
149112	149249	138	Deletion	CCTGCTCCTCCCCTTCCTGCTCCTCCCCTTCCTGCTCCTCCCCTTCCTGCTCCTCCCCTTCCTGCTCCTCCCCTTCCTGCTCCTCCCCTTCCTGCTCCTCCCCTTCCGCTACGTCACTACCGCCTACGTCACTACCGC
149284	149320	37	Deletion	TCCCCTTCCGGTGACGTCATTGACTCCTCCCCTTCCG
149371	149371	1	SNP (transition)	G -> A
149375	149390	16	Deletion	CCCCCCTTAGACCACG
149397	149397	1	SNP (transition)	T -> C

[truncated: 13 more sheets: ST13-LS140310, ST14-LS140325, ST15-LS143101, ST16-LS161221, ST17-LS161227, ST18-LS170109, ST19-LS170307, ST20-LS180416, ST21-LS213627, ST22-LS0433182, ST23-LS9719959, ST24-LS9816616, ST25-LS9922376]
