# Supplementary material for: Phylogenomic assessment of 23 equid alphaherpesvirus 1 isolates obtained from USA-based equids
Source: Virol J. 2023 Nov 29;20:278. doi: 10.1186/s12985-023-02248-z (PMC10688130; doi:10.1186/s12985-023-02248-z)
Supplement: Supplementary file 5 — Additional file 5: Table S27. Detailed results of recombination detection using an alignment containing all 137 EHV-1 isolates in RDP version 4.100 (33). Detection methods used (with default parameters) included R (RDP), G (GENECONV) (34), M (MaxChi) (35), C (Chimaera) (36) and S (Siscan) (37). [file 12985_2023_2248_MOESM5_ESM.xlsx]

## Sheet: Sheet1
			Detection Method
LS Recombinant isolate	Major Parent	Minor Parent	R	G	M	C	S
LS180416	LS113812	Unknown	Pos	Pos	Pos	Pos	Neg		R = RDP
LS180416	Unknown	LS170109	Pos	Pos	Pos	Pos	Neg		G = GENECONV
LS180416	MW396760	Unknown	Neg	Pos	Neg	Neg	Neg		M = MaxChi
LS180416	Unknown	MZ357402	Pos	Pos	Pos	Pos	Pos		C = Chimaera
LS180416	KF644579	KT324727	Pos	Neg	Pos	Neg	Pos		S = Siscan
LS140310	Unknown	LS9816616	Pos	Pos	Pos	Pos	Pos
LS140310	KT324727	KF644578	Neg	Neg	Pos	Neg	Neg
LS140310	LS080124	LS100106	Pos	Pos	Pos	Pos	Pos
LS161227	KT324724	Unknown	Pos	Pos	Pos	Pos	Pos
LS161227	Unknown	MT063054	Neg	Pos	Neg	Neg	Pos
LS113812	Unknown	MF975655	Pos	Pos	Pos	Pos	Neg
LS113812	MW396760	Unknown	Neg	Pos	Pos	Neg	Pos
LS113812	KF644579	Unknown	Pos	Pos	Neg	Neg	Neg
LS113812	Unknown	KF644570	Pos	Pos	Neg	Neg	Pos
LS170109	MW396760	Unknown	Neg	Pos	Pos	Neg	Neg
LS170109	Unknown	LS113812	Pos	Pos	Neg	Neg	Neg
LS170109	LS161227	Unknown	Neg	Pos	Neg	Neg	Neg
LS110114	MZ357402	Unknown	Pos	Pos	Pos	Pos	Pos
LS080124	MW396760	Unknown	Neg	Pos	Neg	Neg	Pos
LS080124	LS161227	Unknown	Pos	Pos	Neg	Neg	Neg
LS080124	LS170307	Unknown	Neg	Pos	Neg	Neg	Neg
LS213627	KF644578	Unknown	Pos	Pos	Pos	Pos	Pos
LS213627	LS9816616	Unknown	Pos	Pos	Neg	Neg	Neg
LS100106	KT324725	Unknown	Pos	Pos	Pos	Pos	Neg
LS111457	MZ357402	Unknown	Pos	Pos	Pos	Pos	Pos
LS111457	MW855962	Unknown	Neg	Pos	Neg	Neg	Neg
LS140325	Unknown	LS9816616	Pos	Pos	Pos	Pos	Pos
LS140325	LS080124	Unknown	Pos	Pos	Pos	Pos	Pos
LS140325	KT324727	Unknown	Pos	Pos	Neg	Neg	Neg
LS9719959	MZ357402	Unknown	Pos	Pos	Neg	Neg	Pos
LS130922	KT324726	Unknown	Neg	Pos	Neg	Neg	Neg
LS9922376	KT324727	Unknown	Neg	Neg	Pos	Neg	Neg
LS9816616	Unknown	MW396757	Neg	Pos	Neg	Neg	Neg
LS170307	Unknown	KT324731	Neg	Pos	Neg	Neg	Neg
